# Supplementary material
Source: publisher figshare collection journal article supplement (https://springernature.figshare.com/ndownloader/files/12358934)
Supplement: Supplementary file 1 [file 12358934]

## Sheet: Sheet1
Sample	BMP 18:1 18:1 Results	CE 14:0 Results	CE 15:0 Results	CE 16:0 Results	CE 16:1 Results	CE 16:2 Results	CE 17:0 Results	CE 17:1 Results	CE 18:0 Results	CE 18:1 Results	CE 18:2 Results	CE 18:2 +2O NH4 (A) Results	CE 18:2 +2O NH4 (B) Results	CE 18:2 +O NH4 Results	CE 18:3 Results	CE 20:1 Results	CE 20:2 Results	CE 20:3 Results	CE 20:4 Results	CE 20:5 Results	CE 22:0 Results	CE 22:1 Results	CE 22:4 Results	CE 22:5 Results	CE 22:6 Results	CE 24:0 Results	CE 24:1 Results	CE 24:4 Results	CE 24:5 Results	CE 24:6 Results	Cer 16:0 Results	Cer 18:0 Results	Cer 20:0 Results	Cer 22:0 Results	Cer 24:0 Results	Cer 24:1 Results	COH (161) Results	COH (95) Results	DG 30:0 -(14:0) Results	DG 30:0 -(16:0) Results	DG 30:1 -(14:0) Results	DG 30:1 -(16:1) Results	DG 32:0 -(14:0) Results	DG 32:0 -(16:0) Results	DG 32:0 -(18:0) Results	DG 32:1 -(14:0) Results	DG 32:1 -(16:0) Results	DG 32:1 -(16:1) Results	DG 32:1 -(18:1) Results
Name	Area	Area	Area	Area	Area	Area	Area	Area	Area	Area	Area	Area	Area	Area	Area	Area	Area	Area	Area	Area	Area	Area	Area	Area	Area	Area	Area	Area	Area	Area	Area	Area	Area	Area	Area	Area	Area	Area	Area	Area	Area	Area	Area	Area	Area	Area	Area	Area	Area
001 equil	2051.99	65		437.76	242	0.371765	57.119	65.8201	230.727	956.728	2712.99	120.079	441.608	429.343	562.481	75.7188	10		494.566	116.037	72.7763	76.5842	33	19		123.21	452.702	54.0451	36.6867		353.394				368.686			128.227	931.426	681.08	185.516	496.473	616.928	17664.2	626.865	242.498	516	1063	343
001 equil	2132.76	52		186.882	235			96.8208	286.591	554.169	441.571	55.6102	385.468	366.699	483.266	97.6953	51			49.3259	54.7201	116.94	5	16		107.894	118.361	46.6374	41.9114	0									649.996	547.697	56.7931	245.388	475.766	12076.7	464.677	220.37	295	413	126
001 equil	2049.46	31		175.565	141		17.2777	66.5533	409.307	521.22	507.11	38.2867	330.47	283.736	445.389	56.2656	28			41.5259	37.5954	79.4179	14	34		150.727	54.3454	55.643	53.4004	7									740.232	413.795	128.509	109.358	492.402	11825.8	526.441	129.435	187	252	602
001 equil	2096.35																																						604.003	429.402	109.38	208.864	388.987	11465.7	438.545	99.5483	227	311	353
002 equil	2015.06	93			156	0.486352	95.5658	70.5862	272.419	442.427	289.15	36.2198	379.596	341.624	459.148	91.9699	58			40.5988	10.2589	85.0585	0	80		122.148	58.4253	57.2622	55.8908	38							178.734		595.611	561.517	116.693	214.775	507.989	11516.2	498.825	184.16	197	379	330
003 equil	2167.5																																						728.172	463.54	92.1328	172.852	424.489	11026.5	402.759	172.514	200	292	407
004 tQC	2281.46	11701	5351.16	159832	100251	4634.09	6598.14	12470.7	13277.5	900415	4.99365e+06	161.215	688.377	2894.94	332869	421.477	3023	165530	2.24213e+06	319697	225.935	178.911	4145	28491	322830	195.959	335.911	221.304	446.706	702	6207.25	2042.09	2146.97	14549	50653.1	19510.2	14536.4	8745.36	1179.02	942.326	287.809	510.965	537.904	15602	650.133	1762.01	1422	1876	1755
005 tQC	2140.44	9858	5098.62	149506	114503	4248.14	6847.06	11887.6	13214.9	825165	4.71356e+06	270.75	703.87	2760.43	308879	529.361	3615	160611	2.04413e+06	347101	130.102	281.021	4074	29593	360919	188.873	238.194	201.599	401.668	644	7135.21	2101.7	1721.87	14625.6	56517.5	18078.7	14069.9	8347.37	1136.89	908.764	380.453	419.529	607.401	14713.5	499.538	1461.67	1602	1785	2019
006 tQC	2256.6	11542	5741.87	140199	116209	3855.13	7193.69	11996.9	13624.8	801904	5.33915e+06	169.128	673.995	2876.01	323243	458.211	2933	163589	2.09062e+06	312048	149.939	304.305	3425	30122	283327	213.562	333.044	202.528	317.43	731	5904.5	1952.89	1890.85	15006	50700.6	20639.8	16010.2	8293.38	1027.23	861.399	309.318	348.297	595.727	15524.4	548.855	1753.13	1552	1629	1851
007 tQC	2180.65	9856	5176.14	152384	92946	4238.1	6919.63	14584.7	12998.3	735814	5.21041e+06	216.72	637.661	2840.98	312926	632.216	3232	169710	1.88396e+06	309174	150.964	246.506	3701	28554	323934	173.241	246.971	213.334	388.297	578	6382.85	1909.03	1732.3	15133.2	49122.5	17898.5	16494.9	11139	1196.12	1150.27	294.527	316.115	538.784	14993.3	598.146	1485.11	1766	1819	2149
008 tQC	2109.65	8636	4313.42	161394	102154	4450.01	6964.1	12428.6	14383.5	1.01132e+06	4.84598e+06	204.372	698.283	2643.39	306780	637.86	2784	177126	1.77511e+06	308391	120.166	253.382	3310	26208	315726	234.055	261.97	237.218	477.288	610	6033.28	2114.04	1648.54	14422.1	50623.2	19119.7	13317.6	9519.81	1092.92	909.965	227.066	324.549	628.271	13632.3	568.583	1784.43	1802	2012	1645
009 tQC	2165.85	9858	6005.1	159177	100434	3485.58	5828.05	12567.1	11058.7	809772	5.61528e+06	189.362	697.138	2729.19	292680	606.918	3084	164223	1.68384e+06	308294	184.37	191.67	3270	29193	291494	169.689	235.241	220.846	416.406	441	5364.84	2029.37	1700.65	14833.1	48982.7	19078.5	14061.9	10392.7	1095.72	858.524	200.86	311.504	508.128	13691.1	458.924	1599.57	1674	2103	2315
010 tQC	2160.13	10218	5250.29	131201	100801	3990.69	6470.82	12643.7	14116.5	737694	5.20706e+06	105.707	688.629	2658.6	322977	667.186	2707	154969	1.8236e+06	303390	39.2734	346.37	3298	25258	288196	143.942	288.016	252.28	397.534	735	5349.97	1922.31	1929.41	14208.6	47659.4	18490.8	13102.3	10166.9	1180.83	869.906	192.001	397.638	565.913	13791.5	541.656	1658.5	1587	1769	2047
011 tQC	2262.26	10901	4883.57	153227	106320	4173.61	5893.56	11654.6	14162.5	868378	4.70725e+06	125.642	644.918	2812.66	295604	444.353	2435	155450	1.95709e+06	330832	119.726	223.467	3651	30580	285284	127.376	284.993	206.182	380.487	624	5883.63	2255.81	1964.28	14877.8	47948.3	18078.9	15182.2	9968.35	1062.22	796.344	212.591	324.362	653.717	14187.6	524.988	1694.6	1495	1905	1747
012 tQC	2143.66	9284	5121.6	140329	79536	3766.01	6214.74	10471.8	13412.1	844754	4.91574e+06	202.649	559.305	2725.48	308198	531.187	2910	149518	1.91282e+06	297503	88.7985	206.013	4830	25653	275431	204.625	338.984	251	539.48	852	5001.32	2007.26	1774.37	14296.3	49002.7	19876.1	14425.1	9599.27	1098.34	910.518	214.256	341.362	579.458	13831.2	614.508	1538.52	1529	1900	1862
013 tQC	2312.3	10632	5349.77	158021	95318	4051.83	6254.28	11647.3	13087	761029	4.49656e+06	186.499	668.508	2730.18	287652	711.007	2428	152289	1.81826e+06	317595	184.074	151.714	3686	24259	279979	202.759	232.686	183.328	686.6	674	5134.05	1961.66	1744.29	13758.6	47482.1	17267.3	14798.3	8783.7	998.235	1012.64	238.908	391.452	496.411	14009.4	554.225	1371.15	1410	1672	1667
014 #01-001 Extracted Blank	2041.19																																						823.108	409.381	155.687	266.679	425.512	10591.8	440.954	109.37	298	355	539
015 #01-002 Blank + ISTD	2005.59	30		344.587	184	2.83978		88.1409	235.351	718.36	1809.1	75.0834	362.428	359.93	490.22	143.501	17		364.616	74.5094	38.4547	99.9806	4	24		84.8683	32.1143	53.3548	35.2145	24									719.95	627.908	105.107	179.136	472.373	11064.3	384.648	196.683	315	340	281
016 #01-003 PQC	2260.42	9678	5826.23	216659	99494	4367.77	7575.16	12357.8	15978.4	1.00754e+06	4.48497e+06	147.338	595.559	2551.32	311399	505.829	2502	151663	1.7221e+06	306566	163.512	167.14	3595	27539	263983	242.989	143.901	262.254	407.032	420	5327.08	2004.24	1712.76	14539.9	45382	17829.6	14054.5	10465.1	1103.49	831.233	239.513	405.47	540.218	13851.2	516.904	1617.68	1604	1684	1992
017 #01-004 Blank + ISTD	2024.41	33		279.325	188	14.6455		143.855	292.784	508.372	2100.04	25.1118	339.765	299.982	522.031	134.192	14		468.679	73.3549	16.2578	53.0126	12	76	120.995	66.7129	54.2217	62.5095	37.5609	0				53.3192					579.014	491.223	94.2729	215.771	468.676	10475.9	476.292	175.939	289	330	417
018 #01-005 1-10-1	2141.34	7799	7383	237000	56261	2692.11	7017.86	11572.7	21089.2	835058	5.684e+06	162.057	536.011	3666.97	271271	726.122	3259	168547	1.79108e+06	312527	114.707	255.29	3285	23851	247008	221.594	210.206	331.093	619.728	590	7064.47	1716.69	2237.61	12698.4	33960	16963.6	14280.5	10933.7	625.095	662.352	108.996	157.886	443.985	11347.1	400.793	642.48	459	590	999
019 #01-006 1-100-3	2172.58	8479	5512.76	184201	74186	2063.45	6222.27	10064.5	21896.7	901763	4.9441e+06	275.174	550.311	2669.61	257736	919.471	3455	146833	1.75346e+06	296888	152.582	217.176	3591	19741	297140	178.85	251.571	283.661	375.701	518	4602.29	2039.16	1904.66	14756.6	49060.7	20423.8	10028.1	8919.49	872.563	705.623	211.128	372.038	515.408	11613.8	478.529	786.183	903	1212	915
020 #01-007 1-100-6	2213.1	6888	3983.27	147001	59712	2168.5	4693.48	8938.4	13761.1	681578	5.4401e+06	132.864	675.655	2314.23	236813	734.073	2508	104339	1.51881e+06	270946	150.147	261.083	2911	19086	274306	236.668	197.593	217.759	647.626	393	6478.06	2370.38	1938.54	15694.2	42646.5	21794.1	11325.8	8853.25	950.907	492.466	143.173	214.326	430.216	11186.7	542.691	862.004	946	906	1030
021 #01-008 1-100-12	2105.59	7920	4676.46	199792	103235	3123.49	4746.26	10479.1	17412.8	929601	4.67584e+06	174.979	659.518	2126.03	275359	596.421	3123	155472	1.62041e+06	313437	142.572	294.567	3278	23949	296060	164.796	290.058	229.244	523.393	468	7230.49	2144.51	2155.28	18288.4	55335.1	21534	12723.4	8613.21	817.903	522.329	191.415	349.981	475.606	12438.6	450.056	809.03	952	1306	1443
022 #01-009 1-102-60	2084.25	6194	3637.08	181486	46264	2838.34	4790.85	6981.96	17980.4	711729	4.63538e+06	133.036	471.417	2616.62	163188	996.97	3160	91938.2	1.62535e+06	813180	202.918	496.868	2877	23962	472862	272.961	406.225	167.823	401.803	362	6683.44	1597.67	1852.18	12478.1	33911.3	21266.7	14453.2	9061.18	888.14	717.044	118.711	250.782	598.115	12266.1	522.698	811.026	699	781	939
023 #01-010 1-102-3	2121.48	4500	2491.72	117359	36105	2122.88	3811.46	4521.24	13768.1	475985	4.10161e+06	116.072	710.369	2745.21	151093	792.04	2328	73864.2	1.10123e+06	308532	217.13	313.412	2351	15222	309257	205.101	447.519	127.423	356.778	408	5381.14	1243.76	1115.06	8772.11	27909.9	11569.8	11756.3	6818.31	770.012	538.59	69.9053	271.5	564.824	12224.5	494.233	688.939	544	736	1015
024 #01-011 1-102-1	2115.85	7265	3613.4	172764	57835	2214.57	4391.55	7464.75	18819.1	601188	4.13841e+06	150.743	587.906	2175.29	166868	617.219	2038	105706	1.22934e+06	478034	195.579	371.31	3236	16990	381384	226.557	325.621	236.142	458.936	471	5273.37	1338.41	1234.27	8755.26	32440.9	13920	12729.3	8514.27	911.109	832.96	115.541	174.415	512.521	14542	434.449	1000.01	1207	1410	1226
025 #01-012 1-102-6	2195.33	4909	4169.41	149020	34418	1800.45	4531.45	6461.39	10954.1	692918	4.0076e+06	271.841	657.722	2160.63	166335	688.031	2726	102552	992449	259798	115.002	284.896	2761	17613	260904	210.481	229.066	171.47	352.33	289	5279.19	1217.57	1147.16	9623.62	28034.6	13940.7	8784.13	7320.81	924.214	622.945	133.865	420.165	507.365	12395.5	439.875	621.126	883	1120	669
026 #01-013 1-102-12	2189.21	5901	2686.6	155498	38921	1966.35	3717.85	6065.99	12904.6	635594	4.41998e+06	145.454	647.61	2707.82	171505	637.636	2532	95550.1	1.20994e+06	216351	108.134	302.652	2543	18110	264796	174.996	332.042	241.717	404.37	251	5724.74	1387.47	1349.47	10506.6	36961.7	12674	11751.5	8493.96	1022.55	775.294	234.232	460.95	528.306	11976.4	435.315	1002.39	879	1474	1453
027 #01-014 1-104-3	2073.03	5201	3316.67	168247	35516	2334.15	4381.67	5496.94	14147.1	798798	5.4382e+06	165.406	635.353	2558.63	159036	1241.38	4008	107568	1.3637e+06	624824	213.055	751.123	3972	22711	467903	173.632	413.997	212.815	561.335	644	5031.08	1121.5	1217.05	9014.8	41710.5	17451	13909.5	8497.16	742.105	581.183	81.0344	183.346	391.648	11833.7	502.939	407.609	471	640	297
028 #01-015 1-104-1	2227.5	4775	4540.74	219707	61125	1775.79	7004.13	7776.82	17752.6	856656	4.43975e+06	266.36	583.868	2692.06	220962	950.421	3439	128739	1.73386e+06	192450	122.679	321.673	4517	22062	308925	186.748	223.196	181.268	433.668	387	5050.4	1501.48	1713.7	11561	42605.3	19580.1	12955.4	9336.6	920.049	775.34	120.142	283.142	550.356	12617.3	530.411	704.978	746	971	758
029 #01-016 1-104-6	2138.62	3895	3041.19	160978	39724	2200.81	3349.46	5981.04	13815.6	951170	5.03233e+06	250.252	652.67	2955.38	193226	1117.84	3918	103161	1.16604e+06	315959	95.1673	699.052	3290	18927	441284	209.121	420.107	245.534	528.944	458	5523.69	1709.26	1605.35	9990.39	34852.5	18822.7	13784.3	7814.25	746.881	770.292	159.455	241.535	563.965	12470.3	496.135	651.794	684	829	556
030 #01-017 1-104-12	2159.47	4824	3231.57	160930	50154	2141.17	4106.98	6878.8	20100.4	762210	5.20786e+06	313.836	646.709	2703.09	173708	736.683	3380	124162	1.3535e+06	179612	175.638	328.676	3625	25051	397413	200.85	321.615	316.721	598.775	451	5529.61	1706.1	1543.38	12851.5	42374.2	16907.2	13062.3	10428.1	633.191	711.578	164.855	252.695	520.812	12094.4	534.701	753.992	850	1118	767
031 #01-018 1-105-60	2286.46	5962	3422.8	139026	55327	1847.53	3367.51	7882.21	9059.67	836088	4.89251e+06	149.179	533.017	2752.69	239149	810.276	3663	83420	919919	167046	110.244	357.263	2732	16522	251079	186.813	376.571	174.582	301.013	204	5127.76	1667.83	2239.24	15661.8	49142	16417.9	13623.1	7217.62	801.199	817.427	144.211	200.824	406.009	11650.8	528.727	948.466	535	575	996
032 tQC	2182.64	8274	4640.32	152410	95778	3396.57	5576.19	11244.1	13361.3	808654	4.52485e+06	174.72	578.64	2531.36	269095	524.964	2825	148655	1.75986e+06	285430	125.127	310.718	3105	27549	278463	163.313	197.38	189.013	570.116	607	4423.34	2014.21	1891.84	12988.9	42897.3	17873.3	12113.5	8995.13	935.335	883.578	207.872	333.317	493.739	13507	585.823	1521.56	1496	1769	1629
033 #01-019 PQC	2148.65	10301	5737.24	228450	89268	3807.74	7853.88	12234.1	21096.7	728315	5.0956e+06	140.165	549.507	2670.47	278275	610.069	2478	147074	1.8951e+06	275143	225.249	254.093	3642	26967	275494	174.733	293.337	142.242	572.752	517	5034.42	2116.05	1873.88	14216.9	48786.8	19390.6	15029.9	7939.18	987.902	868.176	212.459	360.049	653.607	13462.6	472.327	1450.73	1435	1865	1564
034 #01-020 1-105-3	2114.96	7958	3362.56	144915	50754	2228.2	3828.05	8464.87	10943.8	671684	3.96419e+06	167.033	506.231	3214.89	192139	503.488	4609	123696	815229	241842	119.683	259.157	2313	20442	280326	110.216	331.851	163.739	505.063	616	5478.55	1270.44	1323.44	8079.39	28118.5	14616	10992.8	8753.24	975.574	811.669	172.419	279.996	632.492	12201.6	529.784	1397.9	887	1041	1894
035 #01-021 1-105-12	2055.9	10318	3835.08	155391	80477	3491.87	4874.59	9407.29	16325.5	873328	4.04687e+06	214.906	601.244	2478.87	214195	565.115	3420	118759	987127	204734	149.114	357.662	3674	19329	310186	203.018	228.231	343.76	535.841	399	5797.46	1941.58	1800.72	12594.8	48343.8	19763.8	12065.2	7953.58	899.392	792.511	155.229	304.207	486.776	12784.6	600.329	1110.77	1300	1442	1449
036 #01-022 1-105-1	2060.07	11619	4779.35	155970	55752	2034.09	5707.18	7729.04	12787.6	569272	4.54939e+06	156.214	522.575	3049.24	128837	628.685	2427	115248	911223	360772	67.5941	242.672	2682	21778	251584	185.39	195.426	204.538	487.76	457	4639.4	1154.12	1401.5	9796.72	32580.8	14063.2	11994.4	8656.78	2017.56	1435.74	564.692	543.861	754.889	10472.1	674.458	2763.58	502	844	3021
037 #01-023 1-106-3	2198.85	3552	2826.66	118628	55622	1686.2	4228.42	5344.95	8899.7	548878	3.22052e+06	97.5885	522.22	1672.29	137816	435.16	2540	83460.5	1.37549e+06	220493	124.364	226.963	2365	16394	329168	251.02	332.986	139.941	243.328	257	4515.16	1672.68	1826.12	9076.1	30891.2	17549.2	9996.79	7584.15	907.574	897.084	147.027	263.582	480.716	11694.8	448.416	1207.22	977	1145	1180
038 #01-024 1-106-6	2149.39	5083	2552.45	130907	52692	2189.08	4249.98	5190.68	12108.7	487781	3.37869e+06	129.406	566.267	1891.69	168886	706.381	2501	110106	1.44329e+06	290115	111.535	133.327	2760	15201	275864	270.544	245.038	192.011	237.587	305	3429.23	1618.16	1520.7	10773.5	33441.8	18710.5	11063.4	7145.55	991.947	745.389	164.06	261.614	484.148	11448.4	467.339	833.022	765	878	677
039 #01-025 1-106-12	2120.51	8821	2287.96	118227	70267	2911.03	2948.91	4993.36	9544.91	550499	3.35005e+06	228.102	691.996	2612.01	276735	389.058	3445	157322	1.63235e+06	400359	164.71	243.691	3424	19931	370918	268.985	226.417	143.286	421.465	1080	4871.2	1646.98	1644.26	11501	44111.9	17254.6	15248.9	7633.14	1929.86	1910.22	495.933	673.385	718.25	16702.1	690.87	2773.18	2037	2825	3366
040 #01-026 1-106-1	2112.11	5653	2392.02	110498	47230	2893.35	4887.61	5484.34	9577.27	437509	3.02301e+06	80.8972	588.297	1810.11	171309	519.684	2232	144672	1.32081e+06	365765	140.166	361.761	2620	16731	346932	228.191	264.988	247.195	466.726	547	6005.88	2865.26	2208.27	11790.8	40027.5	24079.4	11968.4	8440.94	1252.52	1056.22	308.976	651.457	598.46	15168.4	469.419	1936.37	2250	2841	2137
041 #01-027 1-107-3	2163.75	4409	3937.66	204865	58728	2211.48	4636.99	7696.39	18347.9	872687	5.16804e+06	176.82	648.148	2325.93	236976	1108.95	2913	110750	1.73916e+06	178685	91.5002	239.879	4543	24103	185553	204.553	254.507	382.9	301.401	453	5867.24	1847.11	1552.8	16425.8	49325.3	18956.2	13535.7	9070.11	763.309	601.338	106.385	264.804	483.421	10964.2	556.013	301.664	628	609	802
042 #01-028 1-107-12	2210.65	5415	4232.19	172769	70534	2876.81	6580.36	9323.67	21796.1	1.01125e+06	5.94932e+06	127.952	666.456	2864.65	252364	1232.2	4441	154658	2.12413e+06	259778	141.031	385.838	5782	30547	197238	208.71	294.752	453.809	624.8	629	6324.69	2191.08	2175.21	15687.1	54207.5	19387.8	15867	10658.4	760.059	638.25	133.581	215.1	495.404	11816.6	577.866	513.183	644	669	718
043 #01-029 1-107-1	2213.85	5044	3619.76	150694	77257	1878.85	4599.43	7958.45	18904.2	893696	5.2454e+06	165.381	793.257	3384.12	228538	816.616	3123	132243	2.02012e+06	229942	131.563	201.673	3821	24927	210341	173.796	308.002	277.46	507.066	399	6264.91	2514.98	2296.39	15380.4	50413.3	19375.1	17183.7	10954.8	781.579	715.777	116.979	203.754	425.743	11259.1	443.408	570.775	936	1132	636
044 #01-030 1-107-6	2265.29	5129	3810.57	142230	71746	1677.95	5257.47	7830.84	13766.2	766046	4.49222e+06	242.821	723.794	2512.74	193588	1107.74	3913	121131	2.13279e+06	206607	179.401	236.667	4932	24300	194078	213.902	335.519	413.749	579.21	525	7420.32	2266.55	2309.48	16664.5	50201.4	25309.4	13412.3	9361.06	784.012	770.561	190.271	341.756	612.5	11390.5	505.412	626.458	959	1141	543
045 #01-031 1-108-3	2129.49	3591	3507.43	157014	56470	1363.13	4013.67	7525.05	13860.9	705692	3.78945e+06	130.365	528.986	1943.13	112185	1001.56	2447	56141.9	1.05602e+06	317876	109.965	376.677	1833	13286	354354	164.748	166.255	255.57	271.263	234	4121.4	1620.12	1276.6	7885.05	30826.6	13155.9	11209	7313.07	857.271	434.863	130.379	316.347	454.639	10882.7	452.212	319.408	635	996	553
046 #01-032 1-108-6	1994.28	5090	2514.13	101806	55618	2503.41	3208.75	7542.72	13065.9	668784	4.56687e+06	155.833	694.165	2328.06	139321	705.78	2623	51956.1	845845	453142	61.9871	1033.33	1897	12348	310566	214.959	265.9	154.308	478.297	251	5282.04	1493.58	1128.94	10877.4	39658.1	18513.1	11057.7	8041.1	776.31	655.886	176.077	305.49	395.268	11782.7	419.144	734.252	1098	1215	876
047 #01-033 1-108-1	2135.17	3787	2183.23	140855	67218	1226.34	4524.94	6888.05	14546.6	597592	3.78449e+06	98.4286	575.888	1737.67	127647	611.208	1919	72970.7	958708	208488	92.213	292.768	1954	12001	326106	148.568	149.412	205.26	409.597	262	4224.94	1717.54	1205.88	9259.54	29867.9	17543.8	10233.8	8008.05	835.984	467.23	164.105	221.636	439.307	11693.1	468.678	530.439	877	864	636
048 tQC	2396.18	9079	5060.95	131916	89308	3420.09	5678.77	10897.1	9790.78	580314	4.67747e+06	181.538	567.646	2568.38	303217	595.398	2210	152648	1.71823e+06	267942	61.3747	230.419	3344	22854	277419	178.826	181.75	250.401	552.158	671	4823.67	1848.69	1782.62	11564.6	43466.8	17338	11759.2	7730.2	1072.8	906.951	258.707	353.658	552.57	13766.7	554.619	1287.76	1416	1587	1452
049 #01-034 PQC	2281.55	8999	4554.03	121769	91352	3928.59	6761.51	11344.2	8530.51	750254	5.24956e+06	260.749	549.547	2506.36	271669	581.219	2732	141190	1.32874e+06	237301	88.0055	229.338	2681	28721	259377	155.619	140.177	322.023	419.239	663	4948.25	1869.27	1824.72	14341.9	46814.9	16519.7	12172.6	9656.84	1185.25	1035.81	294.741	390.703	468.859	13084.9	513.601	1493.23	1562	1968	2107
050 #01-035 Blank + ISTD	2101.8	160		747.874	181			75.7297	401.679	1420.36	4918.04	28.7658	423.625	349.648	634.179	113.567	10		1319.3	203.153	25.641	87.5147	3	54	232.868	89.8336	56.1094	45.5129	45.3657	10		177.288	35.8595	78.4456	158.427	70.0044			673.09	618.445	91.7299	176.935	438.034	10601.8	506.22	101.804	178	304	306
051 #01-036 1-108-12	2203.19	4738	3361.84	133842	62523	2767.8	4118.87	8913.21	13141.1	714607	3.92421e+06	203.295	586.646	2432.19	152634	867.451	2865	75664.1	775595	489629	79.4123	356.631	2617	17087	332680	181.515	296.079	211.729	1002.74	500	5110.25	1926.31	2177.72	12118.7	44350.8	18717.1	11986.8	8404.11	918.748	631.809	167.669	297.961	563.75	12006.2	502.535	652.848	878	1252	794
052 #01-037 1-11-6	2254.82	10171	8725.92	177489	59775	3203.39	12095.2	16784.5	31951.5	1.06704e+06	5.88238e+06	93.7091	531.535	2797.02	389439	1519.21	3821	118028	1.47134e+06	435185	231.297	873.085	3667	19081	312542	310.982	400.63	495.224	898.607	674	5259.96	1869.3	1340.85	12544.5	39787.1	18968.9	14802	11973.2	680.875	574.635	128.504	189.89	506.271	10989.5	510.57	571.78	692	854	766
053 #01-038 1-11-3	2223.09	5194	6226.19	163800	69597	2984.69	8950.99	12424.3	24665.4	953956	5.66464e+06	173.945	607.957	2367.33	265651	1517.44	3800	126757	1.36807e+06	219367	166.505	378.153	3313	18489	204283	232.741	388.531	571.387	982.593	496	5123.72	1287.39	1018.91	7933.89	28869.4	10137.4	12822.2	9860.32	863.57	602.536	126.995	214.213	406.442	10900.8	471.428	388.842	373	684	412
054 #01-039 1-11-12	2251.8	6936	5016.55	171582	67714	3275.2	7637.85	11557.1	21701	972884	4.71366e+06	142.936	566.746	2546.05	334673	2407.65	4001	127007	1.50068e+06	345837	267.349	1147.12	3714	18363	244761	268.028	456.065	501.868	1038.93	590	5303.5	1546.31	1396.81	7866.77	29839.7	18608.3	13820.4	9298.72	908.104	558.146	151.86	277.229	475.731	11940	420.229	787.18	939	1104	842
055 #01-040 1-11-60	2172.53	6277	4405.44	129106	70188	1952.66	5275.08	12291.2	18476.8	948472	5.36392e+06	127.998	529.293	3132.11	303076	1132.75	3123	106032	1.53659e+06	244023	186.5	270.939	4015	20620	268962	262.552	280.461	376.371	390.185	468	7159.64	2108.88	2397.7	19746	54821.1	21200.1	15426.8	10632.5	739.788	667.25	184.735	236.791	447.451	11495.3	556.721	906.222	844	798	1265
056 #01-041 1-11-1	2294.01	6677	6862.04	184142	58238	2846.06	9808.86	11921.7	21118.1	811319	5.24676e+06	182.62	568.602	2985.07	303077	1411.92	4614	148336	1.50124e+06	302462	125.345	550.162	3568	21132	282185	239.68	419.861	344.414	726.811	513	5468.79	1571.92	1625.87	10499.9	36771.6	18197	13720.6	13360.2	783.813	677.058	135.04	250.178	407.587	12428.9	384.202	786.008	610	796	779
057 #01-042 1-12-1	2160.85	6103	3515.62	147461	71118	2574.31	4990.9	9872.25	13382.9	790452	3.45547e+06	183.603	541.721	4008.2	157866	526.736	3590	157257	1.49157e+06	145209	144.593	330.84	4989	22271	147459	228.373	304.645	705.872	539.473	818	5261.97	1900.61	1861.63	10120	35050.6	19124	11638.9	6803.44	953.592	818.214	195.493	374.647	528.601	12692.5	505.428	1031.18	1066	1280	1153
058 #01-043 1-12-3	2083.54	5553	3411.15	192315	65778	2037.4	4460.63	6399.9	14591.7	766787	4.14095e+06	110.932	530.63	2822.49	234559	796.706	3182	86602.9	1.4431e+06	155097	93.6869	195.045	4097	19027	145725	154.614	331.79	463.957	389.623	443	4384.11	1343.09	1460.75	10242	34417.2	17824.2	9169.2	7890.26	937.694	662.979	192.912	334.023	548.291	11822.6	540.506	464.454	727	1037	868
059 #01-044 1-12-12	2153.36	8265	2046.29	99079.4	62816	2065.48	2346.49	5701.84	9641.06	486466	3.59748e+06	122.958	545.564	3236.35	237431	545.633	3426	104448	1.09335e+06	192505	121.133	298.43	3082	19297	124734	220.292	239.046	284.085	522.742	504	5193.24	1768.6	1811.4	10904	36763.7	25720.2	9386.64	6916.59	1311.13	1254.55	474.702	644.289	462.666	14353.5	549.539	2392.34	2523	2376	2593
060 #01-045 1-13-1	2273.77	3864	3213.37	141031	72004	1692.24	3714.24	5219.56	9143.35	512669	3.41332e+06	134.744	558.493	1618.43	107881	531.657	1966	109253	1.42482e+06	295290	62.9486	281.066	2444	17467	284456	143.744	186.399	196.202	174.585	296	4195.42	1375.93	960.049	5146.46	17069.7	13227.6	9419.25	5405.95	901.889	693.508	179.562	219.872	455.633	11761.4	498.798	492.806	713	958	705
061 #01-046 1-13-6	2199.69	7402	4870.2	127827	58105	1623.02	4148.64	7528.63	12162.9	574654	3.06921e+06	117.776	471.851	1790.3	192477	461.856	2239	118771	1.13688e+06	262222	126.533	182.14	2052	14313	229976	174.188	186.401	188.87	234.022	413	4058.83	1801.55	1608.9	9370.07	28431	17580.2	9986.62	6270.07	693.631	616.157	160.76	270.237	588.498	11366.9	498.676	516.62	973	1013	779
062 #01-047 1-13-3	2074.48	5473	3060.25	125937	47043	1805.85	2426.83	5799.36	8751.35	502235	3.08545e+06	112.887	494.053	1617.95	119577	466.049	2016	88008.4	895568	192748	90.9831	225.238	1837	14282	219228	156.654	194.375	184.014	257.754	158	4054.68	1362.43	987.971	6525.28	20835.6	13156	8329.81	6644.13	675.691	536.007	129.494	258.775	483.856	10792	474.962	615.091	789	906	785
063 #01-048 1-13-12	2221.07	4894	3712.13	126026	52890	1538.91	3845.77	6249.03	7225.79	550597	3.6188e+06	144.912	527.231	1929.87	147057	314.561	2344	115531	1.28011e+06	270702	72.5617	343.055	2432	18445	245937	175.045	103.526	138.63	230.709	242	4801.25	1635.93	1279.2	7817.57	25668.4	15681.5	9901.07	5579.2	817.611	570.332	228.86	408.722	475.031	12757.3	418.93	752.227	1299	1520	1081
064 #01-049 1-14-1	2174.2	7859	2361.67	138259	67579	2279.01	3753.53	6599.57	13084.2	502582	3.72045e+06	106.966	642.973	3062.22	197608	443.545	3075	165420	1.36956e+06	301047	111.071	217.197	2671	19860	282288	211.736	227.802	232.503	352.28	475	5014.2	2053.74	1812.16	11232.4	35319.6	23337.3	10430.9	6294.31	1074.59	921.94	316.884	418.398	547.868	14327.9	471.983	1305.76	1861	2335	1777
065 tQC	2286.5	8916	4452.28	109531	90272	3244.81	6062.08	9453.97	11728.8	674323	4.12913e+06	216.732	535.26	2518.51	251655	336.422	2698	152529	1.49714e+06	282962	138.494	220.214	3187	24771	243508	151.834	200.325	183.333	343.16	614	5063.45	1703.49	1653.94	14509.3	44432.7	14953.2	14003.3	8853.31	1035.85	822.448	211.585	307.77	549.83	13802.7	551.134	1540.02	1440	2249	2037
066 #01-050 PQC	2131.91	7433	4703.02	127002	84805	3834.1	4698.77	10954.6	10126.7	688568	3.97655e+06	204.724	543.427	2449.25	312618	523.446	2954	132944	1.72589e+06	257311	94.7631	277.76	3256	26912	265333	180.873	305.153	173.911	313.615	610	5410.38	1931.65	1551.74	13203	43135.7	16146	13551.3	9011.34	1197.56	894.559	289.058	514.002	598.486	13685	371.382	1525.08	1687	1933	1688
067 #01-051 1-14-6	2170.24	4356	2546.04	125166	67392	2024.39	3366.1	5927.28	16008.1	758282	4.39687e+06	162.53	547.722	2593.05	194270	496.907	2240	92088.4	1.49522e+06	265465	165.406	188.36	3347	18943	369931	187.893	321.255	207.074	452.568	416	5970.06	2311.24	2219.46	16484.4	52148.9	19220.7	12668.2	8575.4	1222.68	934.551	289.286	454.329	628.046	14084.1	492.458	1618.37	2348	2774	2158
068 #01-052 1-14-12	2225.96	5187	2564.33	107449	69311	1636.21	3483.78	5277.69	9878.33	532413	3.73281e+06	144.903	535.197	3041.19	190375	439.654	2200	93893.9	1.09551e+06	166230	140.59	175.655	2430	15127	274878	169.688	243.427	189.624	366.493	175	6799.43	1792.48	1892.07	14116.6	54741.8	20539.3	11613.6	7888.5	1438.89	1398.74	357.757	550.652	660.727	15453.9	527.892	2744.2	2020	2751	2808
069 #01-053 1-14-3	2231.36	3106	2193.97	119893	59460	1368.65	1925.69	4573.3	4951.81	609615	2.98204e+06	162.573	539.572	3143.11	127217	497.815	2326	78173.4	1.13069e+06	128879	51.128	316.046	2971	16694	243497	119.914	208.74	147.39	304.581	156	4462.24	1300.68	1234.93	10068.2	30376.8	12503.8	9080.24	6355.17	652.49	623.809	150.799	253.583	452.802	11149.7	569.356	774.196	831	880	924
070 #01-054 1-16-1	2120.55	4353	3042.28	104113	91662	1832.85	4290.33	6912.86	9083.6	656533	3.67024e+06	125.365	510.999	2838.27	147656	496.787	1590	110030	1.48057e+06	308347	105.894	358.539	3211	21710	365546	182.265	188.653	224.302	264.05	366	5264.91	2247.19	1688.27	9308.89	27827.8	17849	11808.2	8697.07	940.548	826.709	280.068	391.536	466.283	12953.3	530.319	1355.68	1911	2408	1472
071 #01-055 1-16-3	2171.79	4478	3012.75	142496	69716	1707.57	3900.93	6951.15	18889.5	710574	4.00925e+06	110.909	498.315	3687.29	187331	776.382	2715	113760	1.25487e+06	181039	82.398	194.012	3479	17914	231891	182.007	180.296	200.017	274.624	331	5211.34	2316.45	2346.25	13909.9	33600.1	17904.9	11586.5	8299.32	995.259	611.938	171.353	337.169	460.57	12130.2	533.162	897.646	797	1245	740
072 #01-056 1-16-12	2155.36	3503	2238.7	119498	72150	1502.16	3945.03	6290.48	8432.14	674995	3.74325e+06	133.6	552.246	2730.41	139683	468.942	2148	77631.5	1.28468e+06	125283	131.763	260.238	3008	16949	189938	167.903	268.401	281.934	412.271	238	5245.25	1741.3	1900.14	12152.1	34452.1	19470.8	12583.8	7808.28	961.741	880.413	207.022	436.351	564.724	13374.2	564.692	733.688	1519	2053	1130
073 #01-057 1-16-6	2121.19	6920	3725.33	140053	89204	3251.4	3502.48	11859.7	14900.3	786982	3.23603e+06	107.53	495.672	2958.18	246997	588.899	2735	123628	1.3006e+06	223809	82.8035	254.697	2950	16323	171284	163.136	316.268	252.833	386.983	337	4887.81	1749.22	2017.72	12271.2	34287.8	21297.7	11071.1	7482.91	1052.97	774.452	295.86	382.152	532.147	13006.5	529.607	1460.32	1441	1740	1317
074 #01-058 1-17-3	2109.24	4085	1992.61	105374	49211	1658.6	3552.66	4390.41	10032.9	501084	3.88654e+06	112.678	475.475	1631.35	180393	621.897	2162	61462.7	851880	578719	148.01	577.676	1282	17003	351241	112.794	354.375	95.4338	669.317	436	4571.06	2026.78	1487.5	7755.05	23778.8	15532	10425.3	5947.73	1015.21	991.456	267.922	549.207	527.935	14082.1	559.829	1472.65	1801	2398	2043
075 #01-059 1-17-12	2169.08	3928	2210.27	115025	42754	1904.26	3319.25	5689.97	10715.5	581113	4.62933e+06	86.8514	590.88	2481.74	172946	607.248	3094	96513.1	794065	208268	121.189	201.299	1572	17827	277799	215.37	205.503	103.419	516.417	349	4971.02	2013.24	1903.48	11293.9	35609.3	14046.1	10463.6	6804.81	1761.19	1393.16	487.503	622.775	741.24	14755.4	718.148	2703.79	1587	2224	3120
076 #01-060 1-17-1	2124.48	5453	1773.09	97586.9	38229	1671.42	2271.17	3842.65	9402.78	443441	4.09349e+06	82.9823	555.147	1843.58	215637	640.88	2461	72286	711754	469399	103.228	221.543	1664	15485	258036	146.902	138.779	99.1075	658.162	315	3730.32	1179.63	1001.47	7276.19	20983.2	15466	10001.1	5939.61	1150.32	834.327	248.157	453.977	500.991	14157.3	563.369	1905.21	1374	1647	2573
077 #01-061 1-17-6	2126.98	4401	2381.15	95525.4	50037	1503.18	3376.87	4276.94	12885.8	562300	3.34221e+06	99.0207	527.393	1789.69	145139	530.716	2156	103609	1.00387e+06	217066	115.222	409.85	1908	13133	275081	160.13	219.728	199.139	446.418	332	4877.6	1505.04	1273.66	8136.05	23295.8	11801.5	10110.8	6469.92	1197.2	994.256	320.588	475.497	491.001	13765.4	461.397	1970.18	1867	2430	2027
078 #01-062 1-18-3	2139.97	8970	3720.19	146929	53158	2092.4	5623.08	8620.32	19286.8	859027	4.69079e+06	110.504	557.792	2549.8	300484	729.556	3122	134725	1.58855e+06	196670	160.395	254.796	3775	19794	154702	204.47	239.959	286.434	425.043	316	3972.03	1711.64	1534.22	13956.2	44109.1	17571.4	12202	9855.6	1152.4	726.317	187.656	330.782	538.077	12668.1	562.451	1276.37	678	1134	1483
079 #01-063 1-18-6	2114.99	5051	3116.34	128222	44396	1926.8	4145.06	7716.32	12459.2	677461	4.3194e+06	142.987	613.326	2693.38	269672	751.071	2959	125192	1.38527e+06	163310	137.901	268.954	3636	18102	125693	228.313	256.283	323.418	493.25	531	3623.11	1274.79	1212.66	11217	40905	14783.2	12205.8	9503.5	903.427	720.1	205.179	337.483	532.097	11935.4	458.764	1061.53	938	1150	1350
080 #01-064 1-18-1	2334.84	7301	4779.83	189693	49696	2093.73	4720.1	7789.24	17543.4	750304	4.51776e+06	141.776	604.055	2657.48	217557	717.705	3642	173035	1.70695e+06	220986	98.8477	279.199	3710	21771	197675	169.872	209.35	372.127	644.925	513	4008.48	1519.91	1485.76	12975.7	45672.2	19943.9	12157.4	9612.31	973.322	790.098	122.364	244.263	508.516	11280.3	380.051	691.764	643	844	1130
081 tQC	2226.27	8052	3818.81	133396	77866	3409.51	5126.92	9681.47	11055.9	770307	4.07534e+06	268.665	551.474	2526.18	328775	479.508	2463	140873	1.69621e+06	247523	111.133	140.445	2629	26360	275580	159.56	212.58	348.573	415.699	611	4549.14	1953.87	1509.36	12847.9	44445.8	17357.7	11534.6	8629.35	1302.05	980.985	273.518	282.419	603.44	13923.4	432.946	1854.62	1638	1867	1835
082 #01-065 PQC	2281.18	9892	4328.18	112164	80675	3431.89	5284.13	10197.6	10659.4	694397	4.78569e+06	252.511	517.17	2517.43	259605	482.417	2836	131792	1.88072e+06	277751	94.1131	203.9	3762	27353	265499	164.801	235.438	192.6	356.012	504	5084.17	1746.2	1810.03	13049.7	49417.7	18654.1	12600.1	9848.61	1051.48	693.597	299.441	315.893	458.456	14171.3	430.812	1728.13	1852	2190	2163
083 #01-066 Blank + ISTD	2030.32	24		582.759	256			141.136		1850.61	7022.59	35.1778	430.556	372.426	786.881	125.549	22	300.664	1686.08	271.863	27.1508	90.3775	30	16	251.846	110.361	70.4743	48.4036	49.4086	26					217.858				683.261	381.604	101.219	265.67	534.464	10313.8	360.827	207.595	218	345	342
084 #01-067 1-18-12	2215.46	3693	3558.66	143488	58831	1695.45	5386.49	8221.72	17734.8	680700	4.99113e+06	148.404	520.626	2132.46	199109	1016.51	3756	140984	1.30502e+06	183473	155.406	291.835	4333	18854	173883	202.432	248.782	248.342	459.477	281	4784	1395.37	1166.23	12151.5	37094.3	19688.1	11219.1	9791.28	744.855	556.564	142.208	222.077	423.321	11062.4	638.763	405.936	472	618	593
085 #01-068 1-19-12	2121.15	3282	2437.42	121483	45629	1665.77	3886.46	8833.94	10028	600142	3.96292e+06	154.182	573.436	1892.19	133601	643.513	2303	105234	928181	109869	93.9379	253.924	3395	14231	173280	213.074	267.79	153.466	367.724	239	5815.78	1757.29	1703.54	8670.57	26471.7	15347.4	10094.3	8391.5	939.121	678.703	164.282	282.37	440.971	12768.6	538.496	985.476	1209	1520	861
086 #01-069 1-19-6	2207.62	2797	1750.04	104973	34702	1001.09	2434.22	4762.99	7905.16	413682	3.22199e+06	115.602	561.128	1657.04	116783	611.805	2527	89205.6	1.10656e+06	168500	98.3958	571.189	3815	12199	176822	213.553	358.473	193.619	319.85	423	4927.11	1718.28	1459.01	7945.54	22654.2	18830.1	8788.46	6080.51	963.752	654.529	202.195	363.486	479.011	11882.8	471.631	944.711	1244	1330	1011
087 #01-070 1-19-3	2198.97	2795	1776.33	124930	38190	1137.99	2668.98	4730.68	9458.79	539886	3.53856e+06	86.463	483.764	1616.71	93398	785.167	2301	77859.1	971934	130527	71.6475	559.063	2981	11038	176707	107.714	476.937	236.878	347.729	153	5033.87	1898.94	1354.33	7425.49	23019.4	16555.4	8998.23	6008.19	936.26	544.34	188.705	330.306	546.007	14217.8	437.899	716.922	1304	1620	882
088 #01-071 1-19-1	2197.45	3958	1897.29	89833.4	51323	1408.51	3203.48	4554.18	9673.28	509218	3.62359e+06	111.305	511.094	1883.36	165665	598.693	2130	96419	1.16241e+06	168669	93.0746	336.281	3040	13364	238876	173.941	301.856	151.052	336.677	353	5878.99	2017.62	1413.69	10158.3	28350.5	17279.5	11947.3	8044.99	1604.32	1124.4	392.811	562.67	570.777	16846.4	618.644	1992.14	2753	3454	2315
089 #01-072 1-2-3	2093.24	6864	4650	138094	37207	1596.95	5069.28	7752.24	9142.37	632512	3.72308e+06	120.005	526.39	2191.41	187500	660.761	2266	87284.7	878728	104905	125.43	223.059	2839	13138	110185	124.959	192.133	172.4	222.972	177	4984.67	1282.1	1087.45	8951.53	38229.8	13981.1	10875.9	7291.05	756.425	594.651	171.01	288.306	493.007	14243	515.474	704.899	736	1232	483
090 #01-073 1-2-12	2213.23	8279	5699.89	146428	99721	2107.12	5154.73	10551.6	10116.6	818094	3.65524e+06	47.9902	534.443	2522.59	256410	501.821	2212	101890	759821	124424	88.3929	189.657	2306	17548	118499	146.684	205.399	170.473	328.481	243	5422.86	2294.87	2158.86	15679.7	49775	18146.2	10755.3	8368.58	838.097	721.941	138.697	250.143	552.488	11845.9	401.441	528.874	805	1161	676
091 #01-074 1-2-6	2187	7281	4949.52	115750	58673	2206.81	4865.42	9486.89	8674.43	620560	4.38143e+06	102.286	493.851	2573.29	270703	739.411	2461	93318.5	783843	153872	149.743	195.875	2244	16293	128810	224.005	278.361	155.727	257.156	265	5768.41	1835.5	2031.17	11368.9	41761.6	18945.5	11578.2	7124.16	1678.24	1314.25	623.793	1416.58	661.958	13408.8	571.845	1266.26	2019	3307	1549
092 #01-075 1-2-60	2099.33	6726	4393.02	129310	68016	1637.87	5079.53	9112.8	10420.7	712996	4.00854e+06	153.771	523.077	2348.41	155895	669.069	2783	105272	809955	138922	105.895	229.847	1994	13847	162010	235.062	203.385	140.887	263.207	341	6978.32	2182.24	2270.19	12362.2	45885.2	18891.2	10648.5	7450.57	900.373	713.719	168.504	328.453	444.608	12252.5	488.912	594.52	707	1168	515
093 #01-076 1-20-12	2257.16	3727	3038.08	110841	31843	1678.21	5124.94	5625.98	17616.7	485535	3.78598e+06	102.427	535.132	2385.04	135748	987.593	3660	112893	1.03671e+06	289564	147.322	479.816	2676	14726	349850	250.694	244.253	269.482	566.251	379	4388.95	1179.95	875.14	6632.55	23086.9	11058.1	10066.8	7180.88	803.595	365.378	145.23	300.6	582.557	10801.6	482.432	389.292	532	811	404
094 #01-077 1-20-3	2040.8	3499	3366.87	148494	37543	1430.06	5386.03	6350.37	13317.6	640261	3.80119e+06	106.917	538.68	1898.34	132594	883.99	2979	103722	982507	175685	87.3911	306.066	2587	18343	362438	194.691	231.655	251.906	378.649	467	3563.48	1394.08	955.27	6044.29	21103.1	10595.1	9870.02	7626.27	831.585	590.822	109.081	216.216	611.181	11387.8	329.759	456.28	616	862	551
095 #01-078 1-20-6	2217.58	3196	2553.82	140279	30025	1397.78	3926.24	4875.91	11566.8	563988	3.71879e+06	151.237	472.008	2093.76	160632	833.137	2492	86575.3	913470	252391	141.121	282.267	2039	16117	291001	191.294	247.802	223.586	475.241	417	4710.28	1277.16	1575.67	8927.5	25524.6	11858.2	10063.5	7961.91	737.32	781.493	156.477	290.947	429.67	11436.5	432.081	450.898	661	736	622
096 #01-079 1-20-1	2169.49	3882	3602.36	177562	47995	2090.65	4568.62	7301.76	20964.2	603337	3.54173e+06	140.268	498.385	1894.66	193911	1364.76	2701	97277.3	1.02685e+06	476301	76.2087	765.682	1853	16292	372943	165.468	404.137	131.799	480.839	502	3684.17	1040.01	923.531	5956.58	20324.5	11389.7	11393.5	7632.48	740.702	452.795	183.267	199.524	451.963	9808.61	459.794	423.015	627	712	540
097 #01-080 1-20-60	2138.51	4974	2747.52	130806	61639	2420.56	4429.23	7409.61	18616.5	690473	4.33109e+06	62.4673	495.807	2106.78	291774	902.462	3545	107727	1.01163e+06	338106	106.892	342.982	2910	16553	396837	217.637	271.27	134.353	639.331	657	6508.07	1883.55	1893.13	13580.8	40681.6	19641.4	12027.6	7366.12	928.247	627.247	144.159	285.749	560.714	11128.3	508.213	539.162	909	975	662
098 tQC	2260.42	8533	4528.29	108897	83458	4356.64	5525.25	10808.9	10201.9	862198	4.09606e+06	207.422	507.497	2495.87	285008	402.25	2561	133526	1.67214e+06	267263	90.6057	200.393	3319	22558	254470	166.958	280.973	195.468	523.957	520	5362.72	1809.09	1544.39	12407.3	43560.8	17060.5	13688.1	8563.28	1031.9	788.882	239.264	275.816	541.195	14481.8	514.143	1547.97	1764	1933	2047
099 #01-081 PQC	2038.38	8102	4834.23	99918.2	81067	3616.46	5698.32	9259.9	10773.7	720946	4.58445e+06	224.945	515.661	2499.51	286544	487.827	2393	142641	1.79399e+06	309175	48.5729	268.15	3561	25426	260528	182.646	214.427	139.544	512.191	575	4760.21	2051.22	1682.09	13945.8	43992.8	16343.6	12806.7	8532.38	1320.4	1008.6	263.735	449.497	431.891	13465	512.225	1504.13	2003	2225	2011
100 #01-082 1-22-1	2036.85	3800	1805.13	106867	53872	1594.67	2982.93	4498.94	7585.57	501857	3.77764e+06	78.4611	545.543	2057.57	209683	572.26	2966	89931.9	1.09912e+06	169950	141.432	174.085	2054	14907	146846	148.353	216.444	264.09	410.19	250	4462.77	1468.22	1385.16	9462	28692.1	18574.7	11102.3	7359.15	907.42	734.798	221.439	365.118	515.878	11301	503.62	864.234	1524	2044	1327
101 #01-083 1-22-3	2093.58	4257	2344.06	110360	79356	1560.98	4461.84	6586.92	12553.9	558210	4.11492e+06	119.201	477.312	1711.89	157219	730.783	3214	138607	1.40882e+06	168777	175.041	280.76	3283	20573	187329	187.316	286.07	357.232	408.627	357	4795.65	1435.39	1746.95	11152.4	36963.9	16576.2	14512.3	8075.13	941.781	933.59	304.237	475.243	530.582	12109.3	481.52	1018.1	1515	2126	891
102 #01-084 1-22-12	2207.52	4341	2819.13	131834	68092	1801.96	3482.74	6349.48	14707	726572	5.17242e+06	117.399	548.414	2060.25	190377	1076.4	2974	109600	1.31481e+06	165098	79.1252	196.48	3477	17234	210767	201.374	242.375	333.426	680.356	292	4818.77	1436.5	1456.14	10903.5	34147.5	15605	12954.5	8142.14	818.389	628.429	189.361	197.237	491.54	10930.9	431.08	538.467	788	989	792
103 #01-085 1-22-6	2194.04	6186	3373.31	123608	65206	1638.12	3510.38	7588.34	13042	772867	3.95217e+06	105.895	561.77	2098.35	229471	698.261	2889	123993	1.10312e+06	209506	108.511	308.437	2727	14244	159966	151.809	310.186	137.898	169.32	478	5562.26	2380.41	2497.61	11875	35944.9	17968.2	12155.1	7640.27	831.585	523.386	160.205	197.155	509.435	11464	443.44	558.338	847	921	531
104 #01-086 1-25-1	2250.58	7944	2428.74	130839	92404	2590.51	2470.02	8059.95	9076.81	704032	4.14538e+06	103.422	421.796	3744.02	367108	524.995	3279	154800	1.23453e+06	405493	69.5769	303.963	3753	22392	149263	185.615	265.802	330.633	475.1	799	7361.04	2609.6	2656.08	14162.6	48982.8	27240.9	15171.3	8229.39	1047.4	846.545	259.253	342.216	567.895	12109.9	598.679	1401.99	1353	1374	1562
105 #01-087 1-25-60	2266.64	3959	3805.12	135184	36059	1478.39	4669.05	7718.44	11517.9	866004	6.03073e+06	219.591	455.024	2109.31	205921	737.369	2427	72808.3	1.26559e+06	207478	130.03	338.972	3664	18099	198722	212.291	308.814	237.814	343.393	483	8333.68	4362.6	4687.92	23350.9	48496.2	22913.5	14071.6	9821.49	881.906	687.182	198.366	315.15	531.108	11563.2	463.301	649.076	711	1109	722
106 #01-088 1-25-12	2158.74	3658	2725.22	109921	49571	1216.34	3282.04	4847.75	8886.47	582619	4.01609e+06	69.6297	535.354	2511.97	149108	987.005	2570	83016.9	1.00749e+06	123251	184.102	304.982	2873	15183	187021	214.635	372.244	246.979	271.104	172	4312.83	1749.98	1911.62	10794.3	34262.3	19532.6	11666.6	7346.21	940.278	539.171	191.586	261.986	436.391	10728.9	464.229	827.685	635	802	787
107 #01-089 1-25-6	2113.75	3583	2442.36	122123	73582	1577.41	2486.08	4554.45	7707.46	540776	3.17728e+06	137.355	461.52	1715.81	177186	557.017	2083	93865.2	1.1643e+06	258404	101.158	230.565	3050	18113	216049	218.588	261.755	220.936	285.14	372	4759.05	1548.97	1427.69	7329.78	23442.8	13959.1	10997.8	6381.12	780.629	562.966	140.364	196.218	378.091	11579.8	419.115	904.237	1226	1277	631
108 #01-090 1-25-3	2108.64	7220	2840.44	115845	82216	2370.74	2789.37	6411.45	8913.56	604829	3.86751e+06	86.4982	444.903	2283.25	307126	506.11	3072	127034	1.00908e+06	292733	94.2711	268.1	3378	19214	160098	173.305	222.984	374.508	338.822	594	5482.09	2011.99	2245.42	13262.6	38589.8	17959.6	10453.1	8052.6	894.388	845.79	206.652	345.033	517.757	12225	486.066	1034.37	917	1222	1144
109 #01-091 1-26-12	2191.44	4827	2810.98	134607	34645	2368.37	3998.42	5639.55	16026.3	737592	5.25423e+06	114.184	540.711	2512.53	239690	875.666	2908	85150.5	1.29843e+06	603802	100.839	347.927	2499	19691	361041	203.486	356.836	211.405	524.128	374	5440.45	1875.21	2017.43	15165.6	40396.4	23311.7	11170.9	7834.17	808.739	651.895	99.7827	206.551	481.125	12018.6	533.508	569.46	755	990	688
110 #01-092 1-26-60	2209.83	7395	3258.12	127040	77791	2688.23	3474.93	6449.75	11681.6	788481	4.61605e+06	144.785	481.699	2711.41	353466	480.602	2700	108500	1.43994e+06	482284	74.309	310.333	3830	21154	278026	158.027	255.494	242.979	582.243	999	9440.8	2272.26	3748.44	19928.9	58692.5	30925.1	14987.2	9813.36	869.371	723.206	247.194	277.474	526.205	12734.3	399.156	1296.37	1286	1518	1352
111 #01-093 1-26-3	2148.24	5081	3597.74	178968	45362	1740.83	4146.21	7286.8	17713	811231	4.93605e+06	103.596	526.396	2430.76	295676	915.346	3161	110027	1.68338e+06	524488	144.451	678.356	3219	21016	332228	217.5	334.865	284.748	638.782	565	6811.97	1932.47	2346.24	15095.5	45296.2	28434.4	12362.1	7176.59	689.406	694.048	125.816	215.812	467.981	11930.7	472.307	464.111	997	1153	440
112 #01-094 1-27-6	2080.87	5808	4646.66	136529	54447	2464.57	5248.95	8948.89	12344	551042	4.20169e+06	141.042	511.847	2307.15	194208	553.356	2529	127380	1.39818e+06	486739	44.694	412.767	3040	22899	385472	172.101	253.884	154.838	285.539	362	5135.23	1916.42	1618.35	8882.22	27751.9	16305.7	10619.5	7350.23	1104.69	805.725	202.39	464.541	463.388	12989.6	583.255	1316.4	1628	1622	1729
113 #01-095 1-27-3	2111.33	9213	6298.45	162547	75932	2534.5	6870.11	12475.3	18501.2	803906	4.1499e+06	142.551	533.664	2623.38	222456	843.139	3433	153456	1.56916e+06	393910	40.047	314.391	3656	29751	457656	159.016	180.548	352.882	382.983	608	5977.54	2733.12	1760.52	12237.7	36011.6	18926.1	12409.4	8381.12	1016.9	760.584	186.084	272.565	448.649	13779.5	491.029	926.907	914	1261	1298
114 tQC	2221.4	8538	3926.42	132918	88763	3727.09	5252.53	11051.1	12149.9	858333	4.78525e+06	212.795	442.766	2415.52	302648	655.368	2166	165104	1.82393e+06	266424	128.21	206.485	3800	23839	277357	194.459	226.204	193.333	396.858	571	4502.54	2143.57	1766.35	13068.1	41963.2	16484	11334.1	7591.1	1057.17	921.443	174.676	380.334	429.065	14710.7	393.259	1706.49	1922	2394	1889
115 #01-096 PQC	2124.43	9298	5057.34	125478	79062	3827.17	5703.63	11964.3	11653.6	857440	4.96736e+06	200.519	447.847	2513.89	277482	539.847	2581	139869	1.91776e+06	281106	116.648	199.973	3333	24545	269968	177.049	159.228	225.175	291.119	482	4983.77	1619.19	1914.25	11876.3	46882.2	16987.7	12378.9	7825.65	1090.02	1046.89	210.334	354.467	456.266	14125.2	429.007	1643.18	1757	1964	1508
116 #01-097 Blank + ISTD	1938.09	51		1142.72	340			100.272	139.473	1023.14	3373.4	57.5813	326.996	332.528	590.118	105.285	74		655.992	126.821	24.1989	91.1699	21	17		127.619	45.117	39.1152	37.5964	3				62.9284	170.414				568.416	425.592	39.7735	138.763	382.601	10638.8	441.592	170.701	233	320	391
117 #01-098 1-27-60	2154.76	7345	3956.83	124891	72365	2235.05	3994.67	8157.35	10296.9	589741	3.79736e+06	125.101	446.236	2631.54	280306	358.872	2500	126192	1.26262e+06	390712	133.624	250.676	2867	19941	290138	199.909	257.214	168.778	183.972	400	6368.7	2453.1	3136.12	17534.8	45489.7	21449.1	13016.2	9247.46	1297.44	1068.28	288.074	414.194	437.42	13002	416.161	1907.02	2456	2819	2544
118 #01-099 1-27-12	2032.03	10195	7518.01	178245	65466	3587.94	6590.95	11254.4	14652.4	650170	4.34986e+06	137.297	541.299	2926.24	266462	568.659	3689	102614	1.29171e+06	303219	62.8674	267.405	2551	23864	310779	160.834	176.625	126.684	388.973	731	5318.45	2109.43	1782.77	10622.7	36371.7	17419.6	12546.5	7838.84	1321.13	1328.91	346.95	364.184	573.33	13443	636.456	1951.58	1626	1835	2326
119 #01-100 1-27-1	2183.72	10404	6072.68	128681	89848	3325.89	4719.34	14008.5	15668.5	673312	3.82043e+06	162.153	418.123	2542.81	202225	545.611	2558	128543	1.0376e+06	360303	68.839	467.25	2868	23879	287886	143.865	170.845	162.541	343.498	724	4900.96	1672.53	1371.36	8778.43	27032.6	14105.2	9759	8131.54	1554.6	1547.83	477.701	664.168	526.013	13409.1	466.334	2394.97	2222	2194	3102
120 #01-101 1-28-6	2081.34	6681	3206.69	122924	70363	3019.74	3530.65	7702.38	10897.7	723950	4.33232e+06	108.154	414.085	2647.84	330955	423.349	2262	145447	1.55118e+06	228594	146.514	208.387	3268	22961	182286	143.486	257.591	158.857	345.109	349	5525.4	1887.44	1539.94	10963.3	42510.9	16722	12165.9	9635.95	1509.04	1302.14	491.47	529.701	461.112	14803.4	586.387	2695.95	2844	3368	3138
121 #01-102 1-28-1	2007.9	3794	1710.31	110145	46224	1357.76	2392.05	4530.48	5974.79	431281	2.93557e+06	95.5247	403.89	1325.97	128042	531.893	1998	102806	870674	123243	48.9218	118.638	2555	12913	122227	137.878	173.346	134.863	334.538	253	2434.45	1031.61	850.678	5660.01	16599	10546.4	6891.79	4455.2	638.548	542.726	136.028	254.643	435.49	11363.3	496.297	636.542	803	938	827
122 #01-103 1-28-12	2151.97	5627	2913.03	116186	77557	3286.79	4378.55	8044.01	11888.4	683682	5.64287e+06	100.516	487.099	2401.27	352201	538.758	2598	138149	1.69965e+06	262315	80.3504	196.284	3568	24069	184743	216.132	293.934	243.601	330.787	526	5631.91	2001.69	2039.53	11568.7	44405.2	21660.5	15157.4	11447	1106.95	884.827	424.591	433.26	546.202	14410.1	416.997	1904.97	2774	3013	2327
123 #01-104 1-28-60	2269.9	4382	4829	140793	98438	3189.55	5769.59	9924.62	13281.7	755596	5.02463e+06	110.605	476.987	2789.04	399173	522.956	3240	118838	1.60121e+06	194276	168.541	252.059	4019	24320	210394	247.318	307.598	339.568	587.707	450	6429.44	2365.41	2210.72	16993.4	49673.1	17737.2	13646.7	8732.82	951.377	870.997	237.464	330.949	514.447	12536.5	513.103	1186.99	1467	1942	1651
124 #01-105 1-30-1	2128.26	5922	2232.42	94509.1	45167	1744.36	2624.44	3817.04	8770.98	639431	3.70976e+06	82.219	463.666	2833	276474	457.862	3092	100158	890926	171537	133.125	225.251	2725	17597	118461	195.485	263.944	166.301	540.698	591	5598.92	1472.39	1844.15	12261.3	34556.8	16687.3	9290.48	7733.83	1040.77	803.829	224.082	239.607	499.749	13005.3	458.626	2094.57	1245	1686	2391
125 #01-106 1-30-3	2236.77	3445	1867.75	106205	41875	1514.81	2513.34	4315.17	8807.62	607567	3.97479e+06	108.261	474.796	2437	178018	481.582	1966	102614	1.10079e+06	161671	112.986	250.389	4072	18849	192780	202.674	217.789	175.75	359.82	441	7674.08	2443.85	2393.25	15899.5	44018.2	14619.7	12215.5	8020.21	867.291	722.519	149.635	191.45	372.899	13929.1	402.578	1246.81	1515	1759	1627
126 #01-107 1-30-60	2217.48	6585	3235.22	103876	104450	3187.56	2836.13	7732.06	11074.6	881146	5.19095e+06	69.5451	456.141	3670.37	399341	430.001	2252	139472	1.66118e+06	205831	197.521	243.196	4345	22845	224255	237.386	152.532	150.549	535.538	604	7599.29	1938.04	2682.35	24097.1	70915.7	15483.8	14224.4	8318.57	1255.99	1079.86	289.926	517.584	465.657	14465.3	530.043	2367.32	2309	2455	2739
127 #01-108 1-31-6	2158.04	13824	9699.81	217058	55199	3855.16	10158.3	12847.9	18748.5	940671	4.37094e+06	207.235	573.235	2712.93	284291	1417.1	2948	94400.7	1.58579e+06	1.35479e+06	120.637	743.856	3852	26870	556544	182.779	316.443	286.04	527.157	420	4902.2	1302.67	1206.88	8090.64	26338	13730.7	14056	9589.23	860.731	826.237	146.097	181.745	636.063	10726.9	470.464	947.195	580	774	1149
128 #01-109 1-31-1	2105.94	11086	5730.76	157839	54222	3196.48	8014.48	11525.9	15492.3	747993	4.46401e+06	151.341	446.982	2474.7	269386	716.592	3085	125421	1.29865e+06	629016	140.279	262.51	2615	24750	380414	186.315	263.635	218.586	461.807	557	4727.56	2084.83	1889.24	10396.3	31092.5	16598.7	11922.4	7369.24	1032.57	830.716	166.164	228.533	492.75	11044.8	534.386	1161.06	713	953	1399
129 #01-110 1-31-3	2216.5	7714	5836.36	216350	41566	2543.09	6082.39	7589.75	15644	649132	4.56641e+06	126.779	434.792	2120.09	215069	1202.29	2605	69313.2	1.49994e+06	787955	112.335	651	3519	18425	447229	156.056	350.242	200.282	610.255	425	5282.82	1499.31	1564.35	7961.9	25727.8	15137.2	12330	6695.13	878.994	659.482	151.208	195.659	484.366	11571	439.527	787.779	640	592	1184
130 #01-111 1-31-12	2084.79	9141	5734.51	166349	56083	2633	8130.21	9372.82	15661.1	731221	5.20018e+06	163.888	477.375	2425.21	255726	1005.97	3053	85359.9	1.19398e+06	648431	102.469	311.186	2539	21404	400252	180.145	205.096	374.421	530.036	356	5570.54	1685.52	1619.76	10157.7	31218.3	17343.7	12207.1	8051	832.871	667.751	157.68	233.303	447.884	11213.3	534.295	775.404	738	846	1114
131 tQC	2206.85	7454	4402.21	164142	89932	4062.14	6564.65	10561.7	12752.4	743395	4.87326e+06	207.188	500.033	2457.15	278905	422.232	2669	148783	2.09068e+06	295592	82.9717	254.319	3195	23181	240274	207.429	284.965	97.9911	507.018	510	4713.17	1854.69	1379.24	14272	42955.1	18164.2	12224.3	8793.74	1162.76	1002.33	215.931	246.659	525.778	14084.2	463.807	1628.19	1955	2179	2224
132 #01-112 PQC	2173.6	7977	4205.51	126309	89084	3354.7	5844.28	9688.35	12315.6	794755	5.13859e+06	329.049	386.637	2477.98	294729	490.374	2388	156423	1.94425e+06	291211	164.477	234.907	2993	23473	265100	167.043	308.067	190.93	545.559	665	4710.42	1826.01	1451.39	13192.6	42806.2	17074.3	11445.5	9001.24	1107.14	806.454	250.148	401.334	498.723	14205.2	494.626	1745.49	1990	1960	1895
133 #01-113 1-32-6	2047.93	2681	2292.19	122129	34676	1206.93	2868.53	5261.04	11157	627802	4.57891e+06	131.547	502.951	1989.86	143985	529.493	2694	85602.7	1.03844e+06	106284	104.725	189.802	2525	13185	128431	237.222	269.562	226.745	592.123	184	3802.19	1031.63	1014.85	8798.98	24942.3	10137.4	10296.2	7297.13	816.754	499.875	83.28	241.967	580.859	12858.1	494.507	587.958	886	927	852
134 #01-114 1-32-3	2054.81	3801	1738.48	98731.8	28147	1593.61	2787.39	2683.53	6936.4	463236	3.4335e+06	120.755	428.775	1987.83	84146.2	733.645	2631	75398.7	913522	106352	156.304	437.172	2257	11243	155332	176.614	241.898	206.628	373.814	154	3975.81	1073.34	1613.16	8650.72	19990.3	11657.4	8101.57	5767.78	864.161	724.901	216.359	252.85	546.29	10886.9	394.839	1161.38	686	859	1545
135 #01-115 1-32-1	2067.88	2501	1273.56	106122	21674	1946.06	2902.84	2934.29	9310.81	416821	3.67069e+06	101.074	438.881	2298.81	113162	911.567	3294	95511	920039	178791	80.3453	361.437	2224	11599	164979	195.292	213.434	250.788	504.781	223	4178.02	876.869	1004.18	6083	20333.8	8657.24	8232.02	4947.22	657.904	586.848	84.7804	194.962	461.516	10877.5	470.808	594.431	378	458	804
136 #01-116 1-32-12	2136.61	3112	2280.27	102177	37721	1432.77	2524.41	5808.6	10324.4	637465	3.73388e+06	131.134	451.087	1419.18	127742	1036.46	2502	75430.7	927072	166801	95.3488	385.539	2295	12157	131109	175.804	291.454	136.585	489.393	252	4874.22	1248.4	1475.36	8850.49	25379.1	12956.1	9945.29	6658.04	852.685	689.373	146.259	315.57	395.261	11447.8	425.895	790.442	907	1283	999
137 #01-117 1-33-60	2253.81	7491	4134.43	142098	61321	2320.96	4008.28	7611.84	18840	756706	5.5648e+06	126.126	507.496	2598.56	282262	702.935	3585	118065	1.23287e+06	248353	154.862	333.61	3426	17287	178331	245.932	254.429	336.515	635.469	360	8124.98	1935.87	2556.27	16426.3	44407.7	17306.8	13332.1	10274.9	799.884	587.353	167.228	152.525	514.669	12203.6	465.699	749.304	710	826	755
138 #01-118 1-33-1	2072.89	6238	3353.66	163640	48444	2130.46	4820.75	7312.42	12271.8	672418	4.40291e+06	174.462	480.818	2545.21	265969	759.796	2149	92020.6	1.16435e+06	352976	122.384	266.266	2472	17692	185341	196.055	361.542	240.845	760.266	483	3615.1	1074.58	1127.66	10881.6	31273	14644.3	11198.4	6812.85	626.713	587.965	135.341	206.218	337.448	10847.2	406.745	508.197	319	649	741
139 #01-119 1-33-6	2259.58	4729	2407.37	164889	40697	1581.17	4280.06	5802.81	18586.7	630358	3.82407e+06	120.733	512.818	2471.32	224293	894.462	2660	81988.1	1.08761e+06	249853	140.087	248.575	3484	20615	224046	290.947	348.8	252.632	462.028	265	4879.73	1346.25	1143.26	9904.51	31768.5	13639.2	11238	7763.82	901.813	629.504	140.074	319.171	458.898	11855.6	473.335	611.698	593	938	896
140 #01-120 1-33-3	2064.35	4484	2824.4	152355	33133	1422.75	3919.38	5556.2	15097.5	796344	4.36867e+06	134.446	465.519	2492.48	262969	880.104	3471	82145.5	996334	315139	118.456	315.701	2616	17213	233508	151.193	297.405	206.06	390.119	458	4629.15	1356.51	1470.28	9867.07	27160.4	14985.1	12309.2	6810.72	770.798	607.718	106.529	223.867	485.096	11616.1	392.761	769.788	651	664	650
141 #01-121 1-33-12	2096.27	4851	4092.56	167402	49449	2565.58	4891.81	6973.21	22100.6	846834	4.82008e+06	151.965	587.657	3026.5	281867	1237.13	2688	106009	1.32434e+06	333014	143.147	394.637	4044	21341	290340	234.723	290.67	287.411	565.959	586	5382.83	1936.33	1871.95	13116	41760.7	18540.4	13954.3	7975.25	708.793	540.161	68.1526	195.237	456.118	11253	394.583	386.16	445	565	440
142 #01-122 1-37-60	2060.69	5953	2867.6	144609	57883	2502.8	3457.7	6513.74	11119	756639	3.78774e+06	209.984	420.586	1853.82	197983	762.615	1968	96007.4	1.21201e+06	339082	77.2609	325.86	3114	15636	292505	164.345	309.054	246.92	328.239	242	5825.13	1446.76	1779.83	11200.8	38888.7	16329.5	11873.9	8234.94	763.022	681.346	113.958	253.255	482.997	10737.5	401.246	760.702	644	670	945
143 #01-123 1-37-3	1971.04	3575	1800.29	123268	37705	1958.76	2491.24	3600.13	11403	518762	3.56556e+06	94.8595	457.388	2205.1	182882	615.799	2442	73184	1.11239e+06	313666	135.187	150.895	1618	13492	262733	118.158	237.91	144.988	397.795	279	4611.24	1285.11	1390.5	9078.16	28916	13787.4	11746.2	7949.92	881.872	498.421	227.913	234.245	421.009	10575	465.926	1254.52	741	806	1242
144 #01-124 1-37-6	1967.4	3603	2595.1	101683	44826	1882.43	2875.41	3855.27	9691.61	478990	3.92417e+06	103.907	475.677	1718.56	172987	627.989	1481	64297.1	1.0415e+06	211100	107.003	282.967	1885	13861	248059	222.549	224.601	138.412	421.098	311	3666.2	1168.42	1173.2	7536.84	25205.4	11385.8	10123.7	6388.29	819.243	911.393	163.283	217.097	464.858	12028.1	523.715	980.075	1140	1637	1590
145 #01-125 1-37-12	2027.47	9122	4642.04	117358	60823	3752.4	4330.58	6672.97	13694.6	607118	4.21939e+06	122.547	483.599	2134.15	211075	574.127	1636	71930.2	1.3962e+06	625925	104.772	352.595	2175	18221	261094	189.026	377.976	229.017	641.665	276	4530.47	1511.87	1072.01	7824.08	27362.9	12690.6	9851.45	7687.51	986.436	847.131	301.512	322.112	478.311	10738.8	471.062	1631.19	1258	1593	1786
146 #01-126 1-37-1	1943.76	7187	3918.73	122423	56480	2111.49	4155.93	6997.18	12885	575191	3.64519e+06	163.389	435.215	1992.7	157843	552.859	1863	81408.9	1.2739e+06	505199	95.9418	410.336	1936	19031	302637	138.424	369.863	234.676	600.04	392	4602.17	1428.53	1229.9	8317.81	24522.3	16967.6	10844	6077.58	916.546	561.29	253.407	434.198	466.439	11014.2	434.042	1707.2	1397	1520	2064
147 tQC	2106.75	8597	5322.78	126157	84700	3725.37	6611.9	9460.04	11454.8	698619	4.69706e+06	152.827	519.511	2476.95	279568	394.788	2862	140165	1.49902e+06	278733	133.824	308.415	2987	27228	310015	169.261	215.133	210.496	483.145	507	3939.76	1660.71	1606.71	11539.6	40867.4	15884.5	11973.4	8243.91	935.452	801.52	154.711	206.314	418.749	13334.8	556.242	1497.16	1341	1689	1717
148 #01-127 PQC	2047.23	8043	5147.52	141197	96930	4040.63	6441.81	12419.4	13822.4	691178	4.06622e+06	182.442	403.163	2541.63	270980	581.23	3367	143978	2.09976e+06	280735	132.529	355.272	3580	24579	224923	215.756	184.571	193.666	677.571	581	5514.32	1794.25	1545.07	14307.5	42731.5	17894	12833.3	8482.83	1163.05	982.972	231.726	361.86	603.119	13991.4	553.508	1559.03	1638	2109	2211
149 #01-128 Blank + ISTD	1917.33	44		867.375	305	19.5841		105.698	147.104	1122.1	4442.29	17.2918	315.483	327.125	576.057	141.394	35		803.097	148.181	35.2438	92.2707	25	4	191.504	106.13	32.016	36.5025	54.8169	0									688.046	655.467	154.521	236.796	425.089	10331.1	506.763	197.354	309	619	378
150 #01-129 1-4-3	2022.38	4054	2640.14	163419	63785	2435.31	2675.61	6082.11	12085.9	713343	4.33744e+06	154.295	423.685	2007.15	216660	1176.3	3421	100273	887105	351248	103.201	936.46	2464	14764	345401	125.216	221.722	181.626	419.56	335	4250.75	1426.62	1221.49	9376.77	36985.2	21953.9	11528.3	6845.69	633.222	577.7	142.516	249.367	370.55	12192.5	494.478	418.151	1037	983	326
151 #01-130 1-4-12	2132.62	8770	5129.4	139412	97927	3573.99	7644.91	12721.2	13930.8	770050	5.11323e+06	133.561	412.5	3367.69	466132	830.487	3592	106059	1.02468e+06	326386	168.638	392.689	3036	21947	380743	141.939	231.117	202.231	469.115	388	7829.9	2246.3	2483.64	19314.9	59700.3	27269.3	14310.8	7464.47	915.001	696.842	209.436	244.889	397.355	14188.2	417.179	1169.71	1673	1925	971
152 #01-131 1-4-6	2130.64	4678	3145.66	170695	54618	2092.28	3365.38	7351.89	11048.7	740884	4.96476e+06	142.564	459.998	2514.47	245453	707.493	2896	100819	1.02762e+06	153231	173.381	436.061	2260	14847	325813	179.972	280.108	154.078	401.165	397	5806.15	1912.77	1680.61	15282.2	40126.8	24794.9	11268.5	8187.85	650.827	551.037	99.1618	106.135	451.338	11629.4	426.545	806.124	1238	1206	748
153 #01-132 1-4-1	2066.04	7986	4011.06	125758	72697	2884.56	3654.08	7620.04	8974.9	733463	4.5869e+06	216.843	394.421	3108.85	259034	633.352	3452	143852	1.09862e+06	190130	74.86	300.407	2500	15699	291071	167.759	197.98	183.54	430.727	289	5611.75	1871.26	1625.13	13036.8	44145.8	23202.1	11417.8	8179.79	975.148	714.052	223.605	330.415	413.657	12310.2	403.715	1304.75	1668	2147	1916
154 #01-133 1-41-12	2009.58	10412	4822.23	143772	95013	3857.41	4638.57	11420	12641.8	633678	4.43927e+06	130.415	541.272	2558.87	225963	410.236	2135	123315	1.52828e+06	432153	144.949	159.35	3811	27030	274507	159.028	250.772	108.135	288.247	675	6529.5	2043.54	1824.07	12244.8	45180.6	23631.4	11482.5	7539.36	1016.22	619.362	203.357	282.622	551.458	13085.1	506.726	1080.6	1183	1305	1774
155 #01-134 1-41-3	2066.52	11109	7138.07	215379	104139	3873.64	10177.6	13807	19733	775763	4.83461e+06	94.7926	490.7	2419.62	362102	1103.75	2514	153291	1.64476e+06	336554	167.131	266.27	5138	27496	285607	236.994	520.666	199.113	438.015	610	6477.04	1539.4	1325.21	13599.5	51259	21687.2	12028.1	7294.48	850.642	899.01	309.688	336.111	394.039	11503.6	369.22	1073.82	1411	1159	1537
156 #01-135 1-41-1	2137.54	8424	5222.16	153109	87951	2627.78	5134.68	9343.31	12645.1	836266	3.94425e+06	131.638	470.384	2851.44	244382	877.922	2595	122715	1.39253e+06	249337	94.6335	225.131	3981	24834	215675	166.688	330.557	331.404	360.243	764	6049.53	2071.29	2786.12	14669.3	45348.3	24692.3	11507.5	7501.06	644.71	527.558	55.9973	175.402	395.205	11468.7	447.306	565.31	679	936	606
157 #01-136 1-43-12	2093.65	6812	3847.7	167379	59005	2162.09	3933.48	7444.37	12254.7	671060	4.71723e+06	83.5143	465.702	2486.54	272836	952.899	3433	110661	1.00626e+06	162093	111.582	411.508	3217	18801	158238	144.649	323.498	227.454	412.063	262	4824.32	1453.89	1461.47	11180.4	41245.9	17055.2	12472.2	7411.14	752.571	713.525	176.264	172.079	486.855	10947.2	389.944	731.288	633	642	768
158 #01-137 1-43-3	2102	9132	3964.56	107627	81451	2376.36	4130.56	6702.75	9220.54	639457	4.30453e+06	87.7535	461.626	2180.18	223506	427.525	1965	87610	1.20695e+06	156053	108.936	308.193	3309	20983	190041	121.923	476.393	229.896	512.066	412	4952.87	1724.47	1666.73	11041.3	34672.6	16957.2	13104.6	7371.27	824.101	788.963	232.047	275.481	473.352	12467.7	561.09	1513.23	1553	1559	1908
159 #01-138 1-43-1	2275.46	11099	5227.67	127762	81732	2998.06	4324.44	9049.99	9181.93	648657	5.00046e+06	95.8933	467.744	2976.78	323374	448.967	3989	132972	1.31739e+06	273704	81.5118	337.118	2874	18820	228867	128.546	310.139	315.691	547.744	713	6275.36	1737.61	2894.34	14173.8	43464.5	25060.8	14665	8965.91	1294.92	1219.86	324.422	526.001	670.241	13369.5	511.865	2939.96	1988	2018	3078
160 #01-139 1-43-6	2071.87	8463	4691.78	147308	77755	2812.05	4126.31	9642.63	13032.4	678047	4.16536e+06	90.7378	481.858	1824.78	300053	785.678	2329	110321	1.07742e+06	224973	78.0143	211.358	3559	18282	189130	144.589	365.095	307.78	449.632	520	4798.32	1438.81	1675.13	12522.5	44623.3	17171	9800.7	6629.01	749.433	650.128	151.924	259.129	442.822	10948.6	389.849	629.632	781	806	767
161 #01-140 PQC	2173.66	9811	5240.49	139202	90938	3766.81	5579.57	10884.9	10295.7	712320	4.68102e+06	174.572	495.894	2309.53	278145	491.135	2453	143112	1.64932e+06	241012	144.228	315.922	2894	24348	269180	213.452	141.664	303.809	533.99	559	4981.74	1563.87	1740.44	11564.4	44801.9	17650.8	12297.3	8967.77	909.374	796.65	180.301	276.532	538.363	13247.8	458.167	1242.52	1295	1535	1810
162 #01-141 1-44-1	2170.9	6444	2089.98	97580.7	75894	2567.26	2964.44	7036.75	9642.98	563889	4.02675e+06	145.697	445.027	2536.18	262768	385.044	3027	160311	1.33286e+06	322557	93.8803	248.264	2039	22129	278177	189.229	198.24	197.604	310.102	537	5356.55	1895	2119.07	12852.2	38986.1	18835.7	12085.4	7849.48	1243.14	976.805	359.105	431.351	517.242	13893.3	540.374	2356.26	2103	2820	2910
163 #01-142 1-44-12	2142.23	5110	3267.26	129060	46058	1877.38	3737.14	6770.1	12708.5	542284	3.41259e+06	168.02	378.227	1842.85	148441	614.683	2924	116720	1.11704e+06	115074	210.475	211.944	2550	11779	172284	165.726	216.606	196.878	214.013	173	5508.99	1402.02	1288.54	11170.6	36719.4	13354.4	10376.9	6868.08	655.891	683.906	37.6433	144.909	509.898	12565.8	374.964	469.011	846	999	608
164 tQC	2181.5	8111	4937.42	131869	91059	3485.73	5248.09	11420.3	15187.4	719487	3.91698e+06	127.748	523.486	2456.03	244536	474.481	2011	134178	1.83471e+06	318439	68.2999	184.038	2977	23941	255430	200.148	279.503	143.28	448.366	576	4670.93	1837.49	1473.1	12388.7	41261.5	15980.4	12973.7	7441.27	1082.27	768.814	215.32	276.663	617.619	13223.6	556.463	1394.1	1672	1686	1708
165 #01-143 PQC	1923.16	61		881.233	301	30.7739		147.63	296.868	884.119	3864.77	57.3817	347.746	309.568	615.036	63.6163	9		733.634	136.493	12.2453	117.282	8	19		134.871	25.6809	42.3808	42.3897	17	218.127		30.1689		192.347	86.7789			559.637	483.206	46.9487	178.024	356.65	10530.6	433.987	152.81	251	236	317
166 #01-144 1-44-6	2152.82	3608	2224.53	108586	57035	1505.64	3277.08	5200.27	9848.45	628124	3.25371e+06	82.2993	501.811	1876.78	162768	484.849	2754	100178	1.09538e+06	168512	104.498	261.922	3161	11919	226374	169.884	188.15	224.848	527.788	384	5044.98	1508.81	1358.65	11030.9	34105.4	16984.1	11396.9	5962.17	815.814	520.308	139.995	194.207	396.127	11718.5	455.36	795.928	1181	1263	867
167 #01-145 1-44-60	2148.24	2800	1182.65	96613.5	33375	1759.61	1941.12	3902.38	8524.68	510764	3.58314e+06	91.9438	486.524	2721.51	214143	497.824	2214	129952	1.37393e+06	217058	106.699	209.531	2391	14791	146742	178.176	307.621	129.668	485.789	298	5032.4	1229.82	1899.92	12921.4	33502.7	16416.6	11073.6	7706.54	742.907	664.835	183.292	220.892	449.654	11173.4	409.862	1062.8	878	1042	1524
168 #01-146 1-45-6	2193.59	4113	2030.85	147876	29276	1263.82	3443.07	4468.7	13578	560741	3.73205e+06	181.424	543.951	1973.47	190184	700.936	1875	101220	834948	208579	125.136	333.907	2917	14194	160795	174.34	173.403	290.452	565.68	336	4348.26	976.055	1069.09	7950.36	22207.8	9686.98	9305.36	5973.42	768.609	522.904	90.7395	199.645	463.605	9955.41	522.94	427.696	482	694	408
169 #01-147 1-45-1	2211.6	5068	2589.37	139242	32366	2013	3855.48	5481.08	16397.6	557549	4.36769e+06	182.842	503.697	2649.55	187832	543.6	1931	138816	1.29598e+06	156853	117.982	182.63	2373	15869	179470	182.787	258.973	364.223	433.697	563	3931.69	1460.14	1289.85	8376	27574.1	12313.9	11733	7663.02	851.893	609.362	148.795	249.122	318.11	10513.6	494.82	907.44	722	970	855
170 #01-148 1-45-3	2118.66	7792	3481.48	128607	44142	2428.37	4420.06	7711.21	14251.2	542563	3.87179e+06	89.6413	513.714	2859.39	147701	987.647	1958	74657.1	929593	499530	167.509	423.671	2165	12602	255852	169.694	313.272	189.811	448.257	437	4380.34	1197.69	946.265	9586.33	28278.3	11364.6	10826.5	6964.38	1424.9	1284.08	224.454	378.922	687.899	12703.4	789.548	1644.94	768	926	1795
171 #01-149 1-45-12	2125.52	5154	2520.12	118634	34922	2095.28	2265.73	3576.83	11182	491922	3.97114e+06	199.535	472.814	3109.79	182540	645.122	2326	93740.6	972494	166986	143.895	284.223	2363	13901	201185	180.326	190.139	94.9715	309.49	436	4854.43	1694.86	1649.99	11792.6	40624.1	17028.7	11497.5	7754.52	921.449	773.402	232.58	254.241	446.379	11190.9	475.981	1350.05	801	1241	1868
172 #01-150 1-49-6	2149.56	5206	6108.14	188764	43901	1808.7	5409.62	8299.43	18022.2	649983	4.93724e+06	77.9072	543.833	2281.18	271221	1080.54	3920	113235	1.85859e+06	290673	158.179	444.241	4232	20994	244348	212.661	523.146	728.617	734.309	743	5411.04	1100.84	1165.18	9419.76	27596	14625.7	13009.5	9005.96	675.123	436.987	116.185	228.686	441.124	10322.3	455.752	347.794	379	403	640
173 #01-151 1-49-3	2120.48	4533	5413.24	291229	55611	1872.22	7367.17	10295	24337	1.07918e+06	5.56308e+06	166.818	554.73	2332.61	258598	1411.68	4867	163250	2.28518e+06	283424	153.646	406.482	5900	29315	341988	218.891	412.135	657.777	818.516	556	5931.14	1560.59	1270.8	10534.5	36786.7	13662.6	16063	10263.1	691.694	472.082	106.911	122.09	539.265	10699.2	450.616	405.957	381	896	270
174 #01-152 Blank + ISTD	2057.39	12		737.236	331			136.77	187.881	1258.23	4160.18	88.9276	391.7	322.366	615.802	155.389	25		1123.49	69.0983	1.0145	59.6681	16	20	174.724	108.655	51.4877	43.0787	48.3695	27	221.049	193.844							648.812	549.881	169.481	212.819	413.509	10544.3	351.008	202.432	243	353	275
175 #01-153 1-49-1	2180.83	4895	3463.81	216632	49991	1855.46	5741.46	7540.45	18384.3	829752	5.91639e+06	179.578	500.812	2017.31	262705	1690.54	4595	114375	1.97749e+06	453750	177.503	391.412	5319	26641	427415	191.934	571.748	788.945	891.191	472	5300.92	1120.26	1011.85	8164.69	28762.1	15109	14577	9672.57	739.219	617.621	162.451	273.991	406.206	11483.1	466.553	206.148	416	654	351
176 #01-154 1-49-60	2163.89	8168	4492.5	170111	85713	3197.83	5247.35	10878.6	19019.6	851075	5.16445e+06	85.215	498.181	3081.49	406662	1010.64	4896	180461	2.08537e+06	438752	133.646	550.077	5609	30814	306156	240.052	340.132	490.192	1036.09	1217	7366.56	1921.61	2282.48	16676.6	58165.6	22823.5	15350.2	12063.6	667.722	564.511	94.9814	214.514	407.908	11041	372.237	541.015	646	803	828
177 #01-155 1-5-12	2112.19	7108	2479.14	109119	55914	2204.5	4092.08	5975.22	10879.4	570306	3.74193e+06	80.763	425.704	2016.5	192207	521.278	2724	125352	914074	158674	150.245	265.525	2250	14250	184473	228.221	239.152	195.544	401.608	399	4558.67	1409.06	1077.89	7892.2	26464.9	14024.7	11018.1	7294.75	834.989	891.652	178.045	261.471	477.101	11861.9	450.874	1144.49	1168	1199	1607
178 #01-156 1-5-1	2168.64	3976	2714.26	159085	55373	1577.26	3318.05	6421.86	12918.7	537210	3.66578e+06	75.1493	509.945	1980.42	108952	942.679	2452	92666.6	841463	87979.5	66.3143	252.89	2736	10525	170350	157.157	276.618	294.183	553.761	269	4481.84	1308.52	1169.48	7383.35	25826.6	14037.8	9031.43	5371.04	623.737	482.857	123.283	220.545	412.818	11307.5	462.904	431.134	438	480	616
179 #01-157 1-5-3	2142.49	5071	3379.64	110014	62226	2093.36	4471.49	9320.72	16855.3	665080	3.9853e+06	155.616	475.59	2211	177993	927.177	2403	91804.8	862397	140104	113.635	260.089	2100	12340	183483	145.271	213.423	316.372	572.251	355	4471.2	1353.47	1214.83	9132.97	39336.6	11184.5	11063.5	6929.4	870.625	673.764	156.928	319.686	360.789	11982.2	406.616	1056.04	881	1124	1074
180 tQC	2176.83	7802	4987.2	121261	87786	3724.5	5443.56	10376.4	11860.9	671681	4.88353e+06	242.02	559.478	2415.57	261997	498.181	2464	123522	1.29633e+06	253786	112.693	172.644	2696	28021	287344	199.208	217.916	196.306	379.293	491	5085.15	1743.17	1641.79	12776.5	43152.1	17802.8	13658.3	7262.98	984.918	817.792	230.104	308.336	482.836	13114.6	444.241	1214.03	1500	1396	1818
181 #01-158 PQC	2155.05	8916	4539.33	119168	92505	3421.92	5833.72	10633.3	9851.95	732333	5.32785e+06	126.22	553.192	2394.38	285809	601.26	2567	146565	1.63713e+06	264149	35.6357	201.217	3090	24468	245915	210.67	193.712	207.268	351.962	579	4489.99	1518.16	1673.81	12964.9	41537.9	15376.5	11213.1	10166.9	1250.38	739.519	332.792	437.299	447.211	13159.5	379.173	1372.04	1551	1612	1467
182 #01-159 Blank + ISTD	2044.64	54		247.272	294	6.25379		122.86	270.548	1187.55	4325.77	45.9252	338.496	378.989	661.917	77.2368	17		1115.25	119.306	53.7629	106.838	22	27	150.938	105.193	46.7217	54.5768	53.6959	9	111.946	111.831	58.2376		145.445	34.4838			670.106	495.212	160.35	302.272	409.196	10037.4	489.303	235.931	408	806	318
183 #01-160 1-5-6	2292.8	5082	3415.47	106957	50761	2043.73	4675.26	7618.93	11141.9	720475	3.62092e+06	121.636	512.912	2614.85	191911	625.026	2938	138947	969537	148677	122.977	485.55	2763	16344	176159	207.142	175.454	233.473	534.015	532	5048.78	1231.64	1391.76	8556.22	28958.9	16067.9	9800.6	6855.59	849.591	662.115	175.614	237.815	495.727	11309.2	510.301	1208.84	439	732	1244
184 #01-161 1-50-3	2059.43	6106	4602.91	128791	46033	2400.37	5516.74	7412.65	14301.4	784721	3.60272e+06	199.439	470.656	2365.02	213158	723.541	2852	151544	1.32872e+06	339274	120.816	342.399	3038	21223	277711	172.074	341.277	253.946	334.005	287	5271.11	1626.02	1605.67	11267.5	35927.4	22634.6	11292	8095.18	737.243	677.89	155.196	282.104	537.383	11808.3	381.007	475.491	524	719	600
185 #01-162 1-50-1	2096.36	4679	4014.94	127003	37123	1840.01	5780.25	8012.13	14332.6	629778	4.46079e+06	90.2138	570.351	2370.89	183504	639.717	2851	166571	1.48381e+06	237445	64.2451	222.393	3660	20953	259788	194.313	218.251	211.041	316.288	343	5225.07	1883.4	1437.62	12190.1	48367.2	19000.5	12734.8	8567.1	616.531	531.504	81.5496	190.462	503.665	12748.5	361.743	358.315	452	639	454
186 #01-163 Blank + ISTD	1932.52	40		1473.09	369	0.491696		92.8917	275.341	1093.98	5338.18	32.8742	366.634	374.258	658.905	124.626	118		930.711	234.062	21.8737	60.2119	15	27	159.438	94.5809	18.3422	58.9814	65.9733	10	164.404	203.224			182.533				710.568	469.992	72.7768	158.975	461.741	9945.42	385.146	146.484	191	252	143
187 #01-164 1-50-60	2062.82	6068	3767.66	110727	36110	1833.98	5102.5	6405.15	13024.4	743875	3.93691e+06	126.117	535.275	2456.46	232258	418.127	2724	117597	946560	127487	212.371	238.653	2994	17166	161765	222.812	297.441	195.228	415.734	454	5895.33	1319.7	1802.81	15510.1	50902.5	14841.1	11455.9	7880.05	890.305	481.51	106.206	181.794	459.115	11269.2	488.996	956.349	559	740	1169
188 #01-165 1-50-6	2182.54	4096	3530.88	138030	27836	1806.7	4577.2	6566.24	11833.4	655146	4.83948e+06	148.386	605.509	2906.5	226265	665.196	3050	86551.4	1.3618e+06	147337	73.3891	492.73	4096	22419	245758	220.137	396.926	251.442	315.829	277	5110.41	1555.22	1464.19	11932.4	41733.6	17325	13415.8	8642.78	697.596	565.301	111.899	209.195	510.066	11789.3	346.998	722.808	693	642	720
189 #01-166 1-51-6	2201.7	5699	2866.74	124806	61853	2090.35	4343.51	7766.5	13411	611398	4.22674e+06	66.5707	612.182	2713.11	202528	516.096	2943	131834	1.37804e+06	191481	94.5709	392.617	4027	21282	265253	179.451	300.466	231.665	407.867	458	7134.2	1873.24	1853	13768.8	42584	24792.8	12425.2	8754.04	902.557	923.995	259.143	375.455	474.543	12783.7	391.239	1336.09	1722	1618	1628
190 #01-167 1-51-12	2305.35	6488	2589.9	114340	56990	2120.95	3734.56	4383.29	10599.3	583973	5.03356e+06	133.572	623.271	2971.88	178094	510.187	2482	104291	1.49063e+06	187948	102.514	265.702	3746	20183	336575	150.759	288.038	242.635	591.053	497	6007	1593.49	1722.01	13290.4	44778.5	18194.1	12701.4	9806.79	1203.73	961.643	267.066	321.67	483.839	14169.4	499.788	2253.76	1721	2286	2586
191 #01-168 1-51-3	2258.84	4427	3208.22	149781	45152	2223.9	3266	6420.93	11753.8	550183	4.14434e+06	186.643	571.641	2435.66	149877	754.906	2539	132420	1.52778e+06	436500	67.4554	226.037	2567	22056	408343	174.086	188.655	278.958	508.936	516	4794.2	1294.06	1509.99	9057.5	31205.5	20426.9	12509.6	6984.35	764.024	610.576	115.856	279.786	486	11156.8	419.25	682.957	712	1098	938
192 #01-169 1-51-1	2238.8	8077	2568.65	119921	59571	2627.33	3118.8	5886.24	9830.28	569418	4.81344e+06	101.178	591.439	4185.5	247203	584.358	2331	175166	1.34677e+06	175126	98.23	418.924	3647	22325	222982	244.487	202.926	208.691	406.321	822	5769.06	1376.22	1465.81	13144.5	47352.5	21027.8	13658.8	9082.21	1275.57	1079.81	376.06	537.854	474.661	13277	459.523	2491.11	1743	1861	2562
193 #01-170 1-52-6	2062.37	1972	1001.72	101167	22488	1086.02	1049.63	2170.57	10318.4	562472	3.99486e+06	88.5014	528.27	1634.53	128980	427.537	2194	82873.7	1.1711e+06	122158	141.805	264.628	2406	12415	149274	152.076	132.902	138.46	498.139	290	3905.21	1263.82	1478.97	14822.3	32771.4	10468.2	9173.79	5974.16	750.301	563.634	168.73	206.968	470.052	10155	393.199	304.746	434	451	494
194 #01-171 1-52-12	2129.4	1347	723.415	102968	19397	865.723	898.398	1853.13	9624.16	439477	3.09621e+06	72.6436	498.962	1570.82	106821	480.504	1558	39767.2	840222	105591	144.338	199.031	1846	10533	136559	194.195	219.277	97.4531	321.237	167	3721.55	966.118	1144.17	12641.9	23781.9	7071.35	8561.5	6369.13	581.995	593.973	145.567	225.484	452.449	10534.1	390.297	577.89	390	507	554
195 #01-172 1-52-1	2205.23	3230	1511.19	85470.8	30677	1296.61	2083.04	3311.43	7621.93	495152	2.9954e+06	211.051	495.516	1751.12	134155	636.407	1931	70856.7	1.03702e+06	169023	134.98	218.63	2168	14267	169833	181.577	126.591	187.817	419.397	363	3984.01	1491.3	1293.49	7206.09	21131.8	11527.3	8731.2	7018.73	858.138	514.165	187.477	241.663	545.034	11108.9	430.375	889.8	912	1120	951
196 #01-173 1-52-3	2073.29	1616	1195.56	91452.3	15763	736.193	1376.72	2048.68	7100.81	407978	3.35647e+06	126.679	493.512	1438.41	179599	603.226	1594	51814	837418	134385	134.002	357.806	1904	10265	113721	139.355	134.969	184.174	327.762	164	2694.83	534.742	644.237	6806.87	14701.2	7297.83	6864.55	5906.58	605.392	544.912	110.335	168.357	358.482	10321.2	413.446	364.56	251	406	592
197 tQC	2153.21	9231	4735.37	124118	98577	3668.55	5445.33	10671.6	14113.3	710574	4.45058e+06	242.558	439.494	2471.24	267316	483.463	2612	138882	1.72949e+06	278847	78.0786	202.42	3331	26128	273338	189.03	178.132	361.958	451.362	617	5327.82	2073.58	1497.19	13050	43065.7	16695.9	12578.6	7752.51	990.678	797.858	233.307	314.775	440.138	12982.9	560.422	1489.33	1381	1815	1827
198 #01-174 PQC	2188.65	9125	5547.45	132537	87833	3815.53	5709.11	11132.1	11596	789886	5.18197e+06	190.195	509.063	2403.86	281757	631.267	2584	145651	1.57649e+06	299419	134.429	203.163	3334	25818	286368	170.305	204.889	95.3187	469.289	631	4893.45	1859.28	1527.05	13452.6	41755.9	16242.9	14158.1	8452.79	1212.22	764.047	257.487	389.755	508.692	13273.3	323.3	1594.03	1581	2019	1703
199 #01-175 1-53-6	2249.94	6456	3808.54	152648	60210	2294.04	4096.9	7740.12	12783.3	730282	4.55484e+06	192.612	594.707	2532.54	181842	1045.82	3305	119027	1.19222e+06	168146	122.785	242.244	3854	17919	206292	145.645	316.852	376.202	843.829	497	5274.27	1771.24	1811	12746	41943.1	17027.2	12237.2	7364.69	958.501	707.604	143.353	328.712	487.213	11878.4	499.467	1108.64	884	877	1152
200 #01-176 1-53-3	2188.49	5784	3563.98	130612	52340	2256.44	4640.75	7449.49	14806.4	691834	3.90791e+06	210.929	555.092	2349.3	204689	925.839	2622	92182	1.20453e+06	131232	159.656	256.867	3711	16405	248871	210.23	281.363	552.853	796.679	483	5016.41	1614.83	1375.02	9739.12	36476	19907	12177.1	7256.53	943.628	566.224	131.097	257.861	436.949	11511.2	409.789	726.682	987	1232	972
201 #01-177 PQC	2130.35	9518	4696.23	121922	90360	3319.51	6005.62	10411.3	11683.3	690664	4.65407e+06	165.652	450.865	2366.06	270043	423.684	2491	128307	1.52714e+06	264208	129.569	279.925	2914	26657	248118	160.696	210.981	253.103	511.475	626	4846.14	1831.12	1508.8	11127.8	40224.3	15835.4	11635	8621.62	1107.1	727.349	258.065	414.789	524.184	13377.7	508.226	1504.82	1567	1621	1821
202 #01-178 1-53-1	2181.85	4314	3128.01	134412	56932	1837.29	4115.27	7067.98	11162.9	696741	3.90347e+06	144.709	585.465	2160.37	121684	727.955	2599	91310.4	1.26089e+06	84488.4	76.2235	210.347	3328	16727	194068	174.391	289.119	328.781	718.043	295	5027.86	1574.82	1392.71	9839.46	31407.2	16344.5	9635.46	6564.04	891.578	710.884	149.677	345.207	560.651	11209.7	451.303	788.016	956	1412	1049
203 #01-179 1-56-12	2085.67	10555	5735.99	167092	80160	2945.61	6670.82	11021	18655.3	1.05734e+06	4.50023e+06	135.49	531.494	2941.18	303364	764.233	3208	177549	1.69877e+06	201627	102.581	307.4	4353	23094	211739	206.743	296.347	340.95	369.226	399	6462.25	2016.36	2043.86	14049	48086.1	15479.4	15828.8	9388.79	941.218	566.894	226.544	194.663	383.027	10816.3	592.916	1012.84	802	849	1133
204 #01-180 1-56-1	2129.57	9890	4512.02	148016	100818	2552.14	4660.01	7004.05	13030.4	692175	4.23683e+06	131.563	618.863	2549.92	223244	691.573	3952	178647	1.2681e+06	275288	75.97	227.857	3007	21141	232766	209.216	345.554	304.947	493.721	703	6195.24	1674.96	1711.88	8596.72	32182.9	16825.2	12842.9	7915.6	1041.59	721.529	328.11	480.899	453.275	11697.5	508.247	1234.66	1607	1804	1599
205 #01-181 1-56-3	2199.28	9472	4247.36	169812	76168	2362.37	5120.48	11486.8	17548.1	809052	3.60843e+06	111.123	513.43	2422.76	285294	673.009	2788	148971	1.17461e+06	330264	160.324	304.08	3197	19647	192593	191.996	238.041	322.229	386.401	579	4444.06	1614.61	1587.97	11163.2	31498.6	14651.2	11773.3	7664.37	702.688	697.378	153.013	247.804	384.567	10927.7	448.056	568.62	785	931	873
206 #01-182 1-56-6	2171.3	5408	3718.01	140672	56252	1972.1	4044.2	6725.72	12227.7	703406	3.54967e+06	176.023	632.658	2751.8	233479	718.719	2396	134166	1.2788e+06	225952	81.1272	306.659	3500	21283	180703	176.01	370.27	322.582	429.212	403	4924.02	1103.15	1219.29	11321.5	31106.7	16242.6	11053.1	7848.34	745.281	692.922	155.215	207.112	423.237	10992.7	487.728	560.258	711	808	875
207 #01-183 1-57-6	2051.97	11610	9758.88	170439	70458	4610.54	9724.27	12797.9	15962.8	742120	3.77489e+06	129.947	534.224	2262.98	198369	1741.03	3098	128622	1.24071e+06	790288	201.066	927.565	2402	25628	397747	208.374	369.482	217.252	659.593	450	4373.54	1349.98	1252.56	11475.6	40827.6	15828.5	10941.3	8728.08	785.392	639.14	220.271	196.848	413.681	11250.4	492.25	960.652	760	1186	745
208 #01-184 Blank + ISTD	1958.48	42		1466.73	151			95.2982	243.547	1323.75	4674.66	74.6972	326.208	342.728	708.253	90.4043	21		985.633	214.592	49.0102	55.2336	28	61	315.898	92.511	51.6939	57.6681	42.0452	48									548.441	438.791	83.4049	159.728	359.082	10181	381.315	176.597	190	362	189
209 #01-185 1-57-3	2125	10263	6013.9	159322	70648	3648.98	8437.87	12702.5	13272	714821	3.82827e+06	121.05	516.368	2687.91	218230	738.586	2843	144524	1.26017e+06	464632	94.609	376.699	3036	18165	351698	159.346	196.481	127.986	246.175	608	4155.48	1538.05	1161.37	10238.1	32549.4	15128.6	10990.4	7961.03	941.218	644.315	193.491	243.053	450.28	12207.1	474.63	1098.34	981	1182	1123
210 #01-186 1-57-1	2115.2	12339	8585.54	133975	60661	3657.42	7383.77	14680.3	18651.9	738800	4.60399e+06	142.91	613.511	3285.27	250979	645.703	2965	120596	1.19823e+06	405361	108.497	214.828	2757	19086	326860	176.796	221.683	161.083	270.337	413	5511.06	2140.19	1655.05	13757.8	46558.6	17983.4	12870.5	7924.89	1059.4	954.156	219.674	301.732	499.413	12848.6	540.603	1427.6	1171	1503	1663
211 #01-187 1-59-1	2140.68	7611	2726.53	103272	73990	2323.51	3441.65	5642.59	15404.1	581088	3.65208e+06	118.057	563.459	2727.83	228990	599.334	2432	118609	1.01007e+06	160449	103.002	182.471	2851	18810	131957	224.189	227.341	352.95	791.903	532	5626.73	1485.92	1184.12	11959.5	45745	18316.1	11798.9	8677.93	1001.99	868.198	179.655	393.545	371.874	12899.1	374.952	1247.51	1448	1451	1560
212 #01-188 1-59-6	2083.62	7268	2722.75	108659	78975	1812.71	2831.81	6971.68	9537.54	508909	3.26478e+06	65.0369	501.003	1939.49	188341	287.597	1464	107534	935806	124322	85.7759	188.389	2518	14257	121255	183.577	226.319	135.366	291.983	276	5193.1	1310.88	1090.78	12341.2	45151.7	16017.7	9639.07	5519.26	975.025	827.59	226.24	345.259	477.205	12173.2	458.49	1702.13	1688	1764	1716
213 tQC	2095.52	9504	4957.05	140778	100943	3302.06	6038.9	11021.3	11559.5	784121	4.38309e+06	227.765	512.131	2413.42	259927	259.688	3042	149027	1.77974e+06	268895	83.9301	274.32	3312	22642	332172	211.2	269.038	187.725	497.89	480	4873.91	1616.01	1625.39	14017.9	48578.5	18974.7	12905	7954	1121.24	749.271	213.863	376.303	514.237	13318.5	506.952	1419.01	1834	1925	1694
214 #01-189 PQC	2211.41	8988	4696.99	135165	103927	3365.73	6903.26	11617.1	12097.5	827741	5.34249e+06	207.91	444.443	2442.76	267808	501.896	3124	161645	1.60321e+06	265993	95.6424	265.979	3271	21699	241325	208.471	231.113	112.55	491.364	615	4850.77	1786.32	1755.67	13514.8	45343.7	17633.8	11713.2	8549.06	1064.63	961.059	238.068	333.791	441.538	13096.1	440.136	1664.52	1637	1878	1681
215 #01-190 Blank + ISTD	1967.91	49		648.441	433			94.2638	220.267	1782.86	8947.78	40.6608	344.164	315.078	707.023	76.4667	43	247.647	1837.51	331.357	49.2606	59.7083	12	20	191.592	88.7948	32.5777	38.3714	76.6677				53.612	76.4324		95.0066			660.62	482.022	115.476	258.01	429.358	10004.7	343.588	149.234	133	349	244
216 #01-191 1-59-12	2056.14	5083	2667.93	118335	81227	1750.13	3312.93	5993.58	11383.3	672626	3.98727e+06	149.49	512.586	2394.86	176903	702.987	1586	86553.2	1.11314e+06	161694	50.9914	404.389	3117	18590	156327	231.196	279.326	191.506	391.614	365	4269.87	858.937	1243.67	10344.3	45177.5	14091.3	11754.4	7890.82	1124.08	864.185	177.436	341.349	556.999	12809.4	509.554	1069.91	788	1064	1149
217 #01-192 1-59-3	2096.34	8130	2404.75	99321.5	77252	2345.56	4886.95	6887.73	11224.1	608346	3.46117e+06	149.678	483.34	2378.45	212739	582.716	2233	114311	1.18399e+06	222406	135.142	304.441	3055	21475	224041	232.334	293.556	175.047	619.822	622	5961.35	1684.47	1884.73	12788	46796.8	22456.2	12615.9	7024.59	2872.21	2411.1	1000.87	1215.82	842.88	16169.8	718.248	5627.22	4040	4373	7055
218 #01-193 1-6-1	2033.11	3779	3222.72	128354	48230	1584.42	4404.02	5441.91	10561.6	542312	3.71834e+06	109.49	544.623	1320.24	128295	685.26	1676	99450.4	1.67079e+06	193672	44.374	279.026	3510	18064	275992	138.43	199.666	253.183	312.545	261	4841.69	1604.31	1301.84	8015.34	27238.2	14845.9	10295.1	5844.74	796.648	709.738	132.502	172.851	475.349	11654	357.952	557.312	987	1235	950
219 #01-194 1-6-12	2065.74	5329	2028.34	128569	42096	1988.69	3195.01	4756.12	10335.2	571880	4.34639e+06	82.7091	469.9	1543.14	223603	672.811	2401	85534.2	1.32985e+06	331238	101.767	231.528	2207	15837	177286	154.923	213.404	460.156	670.903	344	4635.8	1001.47	1317.65	8707.7	31796.3	16037.7	10747.4	7692.98	647.783	484.967	119.651	226.472	409.331	11004.4	450.288	294.632	401	444	696
220 #01-195 1-6-3	2054.09	4839	3099.02	108657	42197	2044.76	4814.14	5164.9	12584.3	514046	4.22037e+06	109.587	509.952	2161.9	163714	547.679	2184	96398.3	1.43183e+06	109879	42.4177	340.712	3470	17377	177556	155.363	241.428	187.387	366.084	492	4972.7	1541.24	1126.84	8765.33	28764.8	11840.8	10257.9	8159.34	732.859	580.911	117.452	198.052	406.09	11326.4	371.08	796.939	658	888	846
221 #01-196 1-6-6	2130.66	3590	3080.79	126400	50670	2025.66	4046.3	5375.78	9998.43	647407	4.23297e+06	76.9709	446.135	1501.51	207695	589.406	2007	101045	1.68216e+06	199191	63.509	283.682	3357	18348	244340	202.727	289.966	283.466	556.384	258	4727.99	1684.85	1485.07	10056.4	29703.1	16789.9	10427.5	6149.58	614.037	483.036	124.057	168.342	424.913	11376.7	421.373	481.207	724	874	548
222 #01-197 1-61-1	2110.16	9217	5170.15	127995	56670	3419.96	6700.84	7352.46	12384.6	607348	3.47201e+06	122.189	482.73	3531.26	161832	1347.39	3643	107441	1.28549e+06	372043	203.558	1027.55	3045	20939	231822	208.367	342.088	343.127	600.925	617	6795.78	1729.97	1353.67	8918.51	31402.2	19652.8	11882.5	7581.12	1335.3	968.815	167.709	356.175	555.434	14531.2	578.702	1483.38	1330	1656	1198
223 #01-198 1-61-3	2137.67	9757	8054.22	150906	77578	2733.65	8340.45	11443.4	12388.3	718597	4.05938e+06	84.7686	486.347	3556.24	212681	776.968	3097	102532	1.1087e+06	318045	47.1862	217.694	3086	14979	230721	160.082	268.693	357.211	480.599	554	7991.89	2739.67	2013	12265.7	38296.8	22867.7	10980.3	7871	1220.9	1013.31	154.351	265.433	488.186	12305	569.479	1155.62	930	1226	1235
224 #01-199 1-61-12	2294.92	8334	5934.61	133223	98933	4023.25	5011.22	11824.3	10907.3	733163	3.58888e+06	71.0482	563.161	2659.59	365242	663.251	2563	84226.7	1.304e+06	312381	108.75	429.874	4767	16447	333401	177.12	311.851	458.064	479.001	672	6704.91	1719.64	1415.84	10572	37013.5	22227.3	11958.5	7766.68	1043.05	763.489	158.89	288.212	487.019	13339.5	441.833	1003.24	1620	1732	1207
225 #01-200 1-63-6	1989.4	6088	3937.2	214255	48380	2302.53	5669.14	10170.7	23117.1	923869	5.23513e+06	257.54	407.116	2399.53	226585	1088.02	3353	99957.7	1.40471e+06	579407	140.344	523.228	2708	19049	382153	250.862	323.481	231.013	856.089	497	5680.26	1735.83	1352.28	13470.7	45999.1	18303.1	15340.3	8041.32	735.531	711.063	149.689	245.017	360.02	11383.5	501.004	473.45	441	915	414
226 #01-201 1-63-3	2064.42	7310	3841.2	186435	40732	2994.2	5122.19	9526.28	19069.3	682229	3.89772e+06	157.326	567.56	2838.34	227913	1003.55	3347	97786.1	1.55459e+06	568627	138.288	660.374	1690	24279	433170	203.303	332.391	254.558	926.882	564	4948.27	1762.87	1356.48	10860.8	34590.1	17931.6	13172.9	9242.69	860.244	616.214	119.778	201.301	453.022	10585.1	474.812	658.141	426	638	706
227 #01-202 1-63-12	2040.75	4067	3045.26	175651	36545	2484.53	5418.91	10424.7	24751.4	761680	4.98637e+06	329.261	611.306	2847.39	246070	1180.32	3447	99728.8	1.14202e+06	398215	137.532	407.624	2860	24040	291211	227.856	287.712	275.251	1367.06	521	5351.23	1500.04	1358.49	10155.5	37759.7	15439.7	10700.2	8655.06	650.936	564.173	130.409	279.948	568.899	10792.6	363.777	348.133	450	752	719
228 #01-203 1-63-1	1972.43	4999	4118.13	185160	59167	2822.84	5247.07	11012	21855.7	904042	5.27977e+06	152.995	510.182	2418.41	219810	1238.83	3509	104812	1.84701e+06	595364	87.403	415.416	2732	24881	474143	136.323	236.292	278.355	947.125	558	5024.64	1635.68	1332.37	9682.16	33046.5	18700.3	13014	9993.19	660.839	493.178	85.2193	168.232	444.448	11194.6	486.817	391.929	378	553	618
229 #01-204 1-63-60	2002.35	8050	3709.25	149302	57435	2760.29	4306.65	6591.17	16213	1.01785e+06	4.82457e+06	162.668	428.713	2923.77	311214	954.827	2863	131756	1.34536e+06	451947	117.446	482.467	3640	23558	420800	230.976	364.792	303.027	874.05	412	4928.55	1481.09	1860.76	14400.1	52483.6	17911.9	13957.3	10259.8	1059.77	922.884	235.776	339.203	518.746	12067	530.824	1315.62	914	933	1632
230 tQC	2073.49	9310	3902.74	122999	80891	3789.46	6279.12	12282.2	10835.5	747715	4.64182e+06	161.649	398.868	2350.05	288036	500.57	2427	149668	1.59539e+06	255900	85.6695	222.784	3211	28983	284280	157.749	186.942	144.187	619.778	697	5710.08	1810.32	1781.85	14178.3	45853.8	15791.7	14000	7341.21	1191.3	732.607	217.4	250.55	561.638	12887.3	433.109	1746.19	1922	2123	1610
231 #01-205 PQC	2161.66	9133	4249.28	127498	97459	3233	5699.69	10203.2	12956.8	834633	4.64213e+06	215.717	394.386	2397.33	287413	426.743	2513	143414	1.62135e+06	304485	93.5272	207.019	3178	23987	277930	140.385	205.043	210.713	459.635	521	4802.21	1845.56	1622.37	12626	45341.3	15363.2	14117.7	9329.68	1085.99	941.631	240.26	349.718	445.986	14043	479.273	1680.69	1817	2412	1944
232 #01-206 1-64-6	1977.76	3053	1560.28	92700.3	31216	1440.81	2219.02	3278.43	8926.58	383925	3.40334e+06	123.377	387.25	1925.11	130496	474.102	1855	87130.7	945799	157124	82.4244	230.992	1678	13718	165021	118.177	198.105	128.756	205.246	174	3571.39	1026.76	1085.97	7342.51	22895.7	12472.4	8370.56	5798.08	699.244	739.572	102.581	115.209	446.415	11729.7	436.754	759.412	715	1035	866
233 #01-207 1-64-3	2074.19	3528	1371.19	121405	34360	1417.33	1891.37	3519.12	6908.9	383516	3.03205e+06	108.787	404.567	1958.37	126068	591.396	1805	104649	818998	151752	79.2407	249.339	1765	12580	172556	122.175	166.69	232.786	411.265	397	2943.92	1024.21	991.878	4864.17	17016.7	12064.1	8590.35	5176.22	930.339	697.087	215.323	244.169	485.18	11953.1	427.977	1271.11	1131	1302	980
234 #01-208 1-64-12	2009.46	2879	1329.46	86164.4	30938	1251.21	2155.34	2364.29	7621.51	385616	3.33147e+06	105.225	345.632	2023.47	133339	359.104	1760	114339	848581	106170	95.915	119.257	2187	13460	120578	124.395	129.637	243.09	135.403	292	3297.77	1038.84	1412.76	8210.23	24174.2	12888.8	7676.41	5059.53	947.659	726.483	177.133	294.269	474.662	11841.3	425.416	1567.89	1406	1504	1617
235 #01-209 1-64-1	2078.3	9315	2443.19	90924.6	42966	2227.35	3061.2	3937.01	8247.86	439831	3.25238e+06	93.8805	377.876	2859.1	187609	360.477	2011	114982	987741	224224	54.1243	134.989	1880	12509	149456	137.799	219.739	65.9702	361.173	274	3249.4	1164.96	1086	6888.82	23734.5	14059.8	7845.14	6178.56	2157.28	1781.23	427.95	555.841	587.858	14832.8	579.399	3276.01	1697	2199	3831
236 #01-210 1-65-6	2117.24	5462	3281.2	126507	62983	2554.55	5049.56	9286.08	15641	763700	4.6348e+06	127.273	458.861	2810.71	197087	607.051	3163	146924	1.22018e+06	210462	128.55	375.875	3015	20679	263072	137.366	171.414	306.587	552.343	678	4592.35	2011.68	1867.62	13733.2	49029.8	17905.4	11630.9	8105.2	988.743	857.307	161.154	287.005	415.391	11540.8	378.653	1497.44	1566	1898	1644
237 #01-211 1-65-60	2176.15	11160	4487.79	102087	166834	3503.13	3923.93	11587.1	9737.24	722286	4.27128e+06	107.526	391.295	5349.51	419067	417.059	3185	151903	1.0784e+06	239375	95.5027	331.878	2614	21218	201819	178.815	206.712	175.566	271.276	919	5866.99	2211.93	2879.16	18524	60910.4	20042.5	12673.2	9803.88	3052.18	2363.24	812.927	1020.73	570.178	18981.9	666.476	3478.75	5758	6454	4151
238 #01-212 1-65-3	2041.69	3595	2712.63	161073	62173	1477.16	4187.4	6897.68	11528.4	658252	3.5189e+06	109.245	440.634	1805.22	162387	786.157	3088	130624	1.16209e+06	130631	65.5537	136.267	3724	17420	226571	141.245	245.726	315.826	431.194	477	3954.27	1460.31	1214.72	8541.16	36015.2	14951.9	10664.7	7754.66	645.527	446.983	119.188	126.91	353.829	10652.5	385.333	624.827	938	1136	762
239 #01-213 1-65-12	2075.74	4762	2916.71	126636	56369	1915.14	3322.06	6039.06	9638.94	787901	4.16743e+06	115.281	412.373	3281.32	238027	570.7	2165	120865	1.06044e+06	181369	147.514	295.407	2943	17152	224458	209.923	138.272	190.773	475.442	413	3883.75	1571.07	1383.64	10655.4	38462.8	12797	11238	7631.71	1109.35	947.474	225.61	261.244	413.575	12205.3	517.957	1559.74	1777	1398	1730
240 #01-214 1-65-1	1942.93	5912	1763.45	107653	64236	1873.86	2890.5	6531.08	9928.6	604192	3.47095e+06	77.6128	355.064	1805.46	153004	536.703	2349	131853	1.04333e+06	211503	44.532	268.51	2816	17093	289206	162.823	218.43	194.314	504.761	411	4321.75	1819.74	1245.1	7275.36	30258.1	15191.6	11317.5	8761.27	882.431	753.223	249.387	278.553	335.718	12213.1	395.693	1192.05	1968	2588	1192
241 #01-215 1-68-1	2141.32	5476	3362.56	127087	56035	1880.39	7118.21	13320.3	16074	718895	4.0649e+06	87.2944	330.996	2190.59	207782	588.216	2781	136830	1.2361e+06	163924	102.104	292.378	2488	18718	187823	112.403	222.552	117.768	296.336	314	5665.89	2217.07	2001.84	10989.7	29961.9	17905.2	13372.7	7425.56	653.424	546.97	85.3672	140.463	327.677	10810	287.546	844.854	910	998	999
242 #01-216 1-68-12	2097.32	3342	4258.74	156225	40152	1983.17	8590.71	11446.1	24999.1	890532	4.74632e+06	200.25	434.337	2269.67	171355	936.877	3722	143522	1.38106e+06	120227	111.887	386.547	4931	24292	226837	205.616	284.483	410.053	493.62	330	6912.66	2803.48	1820.63	10223.4	29484.5	18668.3	13674.8	9698.29	613.154	422.664	78.8508	145.957	313.08	11161.3	333.521	615.64	764	1023	783
243 #01-217 1-68-3	2159.12	3058	2909.5	149078	49747	1992.04	7326.85	9315.44	15440.5	784532	3.87363e+06	140.932	434.539	2055.37	221129	619.723	2647	151674	1.48794e+06	137524	102.494	281.464	3279	22954	222751	169.231	269.166	259.077	319.914	230	5670.29	2054.53	1464.12	8166.32	26879.6	13900.3	12498.2	8381.63	626.1	578.593	113.487	144.403	331.148	10264.4	340.097	687.519	779	1160	909
244 #01-218 1-68-6	2029.03	3393	2773.62	165432	41028	2412.65	5805.73	8494.58	19749.4	878937	4.76898e+06	212.275	453.952	2249.36	193243	1024.27	3472	118051	1.73879e+06	184096	78.5511	324.879	4432	20733	236448	153.631	310.598	343.251	543.226	282	6284.15	2038.8	1668.91	9662.17	29438.2	16536.9	13682.3	8384.3	540.129	411.264	100.385	86.6506	412.441	9839.34	424.651	227.226	605	509	365
245 #01-219 1-7-1	2067.04	4584	1992.84	122655	56054	1489.32	3605.04	7083.94	15525.2	631358	3.9087e+06	170.46	306.439	2176.24	134177	696.569	2633	124986	1.34863e+06	104133	114.113	230.676	4465	23473	179207	125.455	343.299	209.513	276.468	581	4873.03	1946.25	1337.71	8069.54	30479.2	13863.5	12130.6	6796.55	873.054	843.769	140.191	229.503	328.424	12420.1	379.081	1081.81	1511	1832	1202
246 tQC	2095.51	7858	5030.73	130910	80396	3282.33	4902.4	8812.45	12958.6	656895	4.69828e+06	270.837	344.316	2209.97	259782	639.548	2044	124322	1.63634e+06	272066	62.9202	154.175	2406	22128	256017	189.879	124.947	215.844	260.304	472	4627.28	1845.5	1487.8	10835.5	37928.6	15748.2	10740.3	8946.05	950.979	934.961	181.463	240.276	422.87	12602.7	350.114	1362.27	1525	2256	1678
247 #01-220 PQC	2191.31	8078	5156.97	120104	79680	3607.97	5044.7	10461.8	11613.3	749203	4.10919e+06	248.48	358.722	2153.3	275252	477.763	1871	126599	1.53133e+06	252943	100.01	225.201	2904	23601	231775	200.426	254.243	206.396	266.875	552	4124.66	1751.78	1750.22	10015.1	42290.2	16579.3	11390.2	6327.53	879.892	895.079	201.779	228.667	466.028	12350.1	398.824	1422.42	1965	1719	1905
248 #01-221 Blank + ISTD	1862.13	58		946.854	379		71.5954	146.807	202.353	2151.11	10640.9	32.6416	267.833	250.236	821.845	63.0889	45	299.772	2572.17	390.208	68.1936	73.3366	7	55	279.807	85.0505	22.6664	28.2875	40.9232	0		130.409	21.8522						505.462	314.069	79.1431	48.9856	303.352	8078.41	276.484	123.462	185	360	148
249 #01-222 1-7-12	2094.09	4151	2361.11	148635	49031	1366.81	3787.2	6328.26	13810.5	669136	3.89972e+06	130.012	538.995	2215.68	158384	411.793	3050	88318.5	1.40725e+06	107884	124.991	286.819	4019	23173	182144	211.686	235.873	198.672	212.367	312	5010.74	1834.51	1785.12	10522	33510.7	17166.5	12419.8	7791.59	750.355	475.127	214.9	334.661	415.891	12828	418.706	702.139	1488	1862	976
250 #01-223 1-7-6	2009.42	3080	2333.83	126966	40723	1031.81	2958.99	5786.04	14316.7	615577	4.34764e+06	124.189	403.269	2260.85	153303	692.488	2726	105391	1.244e+06	101404	135.934	274.169	2844	17818	216780	180.767	253.333	288.179	431.885	291	6246.18	1694.04	1242.81	10504.9	34444.5	14303.7	11023.6	7489.23	797.09	621.884	94.6875	225.742	503.011	11517	416.07	497.651	690	1258	920
251 #01-224 1-7-3	2081.73	5027	3094.71	161009	43546	1825.46	3951.36	7207.69	17477	792373	4.20741e+06	197.338	580.176	2884.57	166986	743.282	3299	109901	1.30446e+06	155361	182.086	196.97	3395	20197	214827	197.415	237.342	283.381	418.331	338	4314.72	1675.34	1250.49	9914.84	30201	14691.8	11694.7	7737.65	761.5	678.955	134.077	288	400.194	12251.4	459.312	663.837	978	1290	824
252 #01-225 1-71-3	2087.47	3882	3137.71	105996	39894	1721.17	3601.3	6475.64	8440.13	545080	3.44469e+06	133.385	400.572	2022.84	211220	578.429	2036	71507.7	992129	257342	95.7458	368.601	1896	12655	242555	133.913	310.718	167.775	322.35	250	4180.59	1093.44	943.959	8378.37	22791.5	13802.5	8484.24	6505.04	801.597	612.988	183.531	288.344	404.733	10912.8	348.813	863.272	828	1025	1164
253 #01-226 1-71-1	2155.21	5461	3377.84	101442	37407	1758.08	3489.54	5100.81	8087.14	476592	3.0665e+06	172.746	325.75	1524.12	136968	569.183	2206	74223	1.20506e+06	384478	85.5513	357.392	2710	13561	274284	126.1	212.08	108.053	476.101	253	4905.54	1658.45	1152.77	8152.64	23506.9	15032.6	8661.92	6216.81	708.687	762.119	161.247	203.758	411.335	12089.7	349.074	1075.5	1102	1266	1110
254 #01-227 1-71-12	1959.38	3554	1880.49	85291	23484	1384.23	2097.45	2743.24	6141.71	382187	2.92183e+06	87.8686	359.396	1794.99	144411	330.351	1524	56625.7	896455	129489	80.3749	143.414	1898	10806	164817	184.8	149.377	111.132	225.055	169	3638.86	1054	756.827	7288.36	23946	11430.7	8352.35	4881.07	903.474	643.596	119.138	259.196	362.202	10772.3	329.738	1551.23	1001	1104	1711
255 #01-228 1-71-6	2046.01	4516	2982.43	127112	40134	1617.23	3114.94	5632.59	8379.23	533730	4.23337e+06	146.713	352.274	1820.47	200471	433.289	1876	82914.1	1.14456e+06	262389	113.073	196.605	2057	13731	244418	138.876	190.473	186.197	331.053	342	5024.86	1235.01	1582.04	11618.4	31030.2	13795.4	10657.9	7492.31	860.969	808.505	115.841	196.478	388.53	12900.7	451.432	1371.91	1043	1253	1665
256 #01-229 1-75-1	2081.13	11586	4534.91	121378	78432	2764.73	6673.43	7721.87	20304.8	664449	3.79538e+06	460.564	363.037	3720.98	360785	658.181	3363	120435	1.95652e+06	403067	177.528	335.389	3680	23404	243994	223.66	391.856	199.075	483.017	727	5904.4	2594.58	2339.29	15103.9	39937.3	27149.3	13421.5	9948.8	1062.76	1049.33	304.286	421.317	512.118	13026.1	401.605	2040.6	1984	2317	2439
257 #01-230 1-75-3	2147.81	6012	4470.84	129845	73623	2153.19	5092.78	7248.9	17282.9	748652	4.93601e+06	206.061	523.15	4399.43	292094	702.991	2946	150100	1.56209e+06	198527	179.453	262.556	3935	20725	229197	277.662	316.173	241.528	429.346	698	6459.05	1709.55	1866.61	14572.7	41576.1	21245.9	11718	9907.53	799.303	641.185	133.944	163.604	363.424	10739.5	372.694	1045.17	767	1011	1620
258 #01-231 1-75-6	2161.88	7159	3183.97	140395	67867	1724.34	5185.57	8093.87	15729	750879	4.14974e+06	123.708	397.59	3354.48	257601	888.543	3191	152118	1.35252e+06	158855	168.702	384.123	3991	20630	178025	171.914	381.857	344.993	297.56	429	6267.86	2491	2880.15	14385.3	40476.5	22904.2	11123.3	6109.91	814.748	747.687	142.191	267.954	472.835	12078.4	425.484	1391.63	1213	1291	1437
259 #01-232 1-75-12	2038.1	9372	4492.7	173879	77586	2457.24	6347.85	8882.82	22443.5	876094	3.74917e+06	173.306	439.831	3989.84	243189	941.482	3117	122204	1.57677e+06	153716	182.296	311.829	4129	21665	205385	253.781	300.812	390.925	545.508	457	6206.04	1831.74	2076.07	12871.7	44013.7	17333.9	10941.7	7464.91	924.751	973.637	251.134	291.599	380.983	12197.2	370.246	1544.21	1526	1803	1485
260 #01-233 1-75-60	2116.49	6889	3126.24	133546	82704	2731.07	3623.93	5142.99	14527.3	686740	4.46493e+06	129.157	385.199	3017.33	232618	851.053	2894	115660	1.29555e+06	360014	224.932	261.195	2582	15136	312125	189.195	335.07	183.398	374.221	685	7779.2	2456.86	3367.14	20931.1	54245.8	30225.6	14265.6	7841.73	768.933	554.096	83.5484	185.355	498.917	10897.1	364.951	967.765	1156	1148	1051
261 #01-234 1-76-1	2156.87	6607	3241.18	135590	80859	2203	3159.44	7811.73	11158	657257	3.82359e+06	75.8256	381.553	1878.39	217142	821.076	2858	117592	1.24168e+06	259402	122.81	255.02	2048	12754	191761	184.119	260.692	175.321	263.115	415	4423.42	1483.32	2008.49	10610.7	37801.5	20290.1	11674	6685.8	846.37	710.052	153.472	243.925	316.648	11250.2	360.725	656.052	1159	1493	1217
262 #01-235 1-76-3	2207	5209	2974.24	139443	62275	2320.33	3612.26	6858.71	10168.4	700042	3.52439e+06	150.787	400.686	2550.11	163035	957.916	2297	118795	1.12695e+06	480187	100.167	653.657	2068	15172	297710	141.875	317.406	126.218	449.893	354	3984.73	1457.53	1779.49	9511.41	27678	19855.9	8427.52	5861.04	853.31	582.805	187.528	380.979	336.886	11436.8	426.396	692.988	962	1335	1088
263 tQC	2121.03	8909	6200.77	144563	114818	4117.87	7338.29	13133.1	15031.4	808407	5.23949e+06	136.841	576.591	2615.19	339302	786.64	1542	176117	1.55654e+06	305930	111.366	256.102	4932	30062	319641	131.778	274.132	249.993	541.846	823	6589.51	2207.41	2148.83	15677.1	57424.1	22250.1	11238.3	7171.55	1032.23	792.726	148.439	242.128	503.761	12644.4	391.71	1811.99	1327	1633	1690
264 #01-236 PQC	2046.56	8250	5422.45	128185	75820	3294.92	7415.4	11080.1	11923.7	728482	4.14557e+06	1644.96	405.371	2769.53	271302	648.548	2571	126070	1.34815e+06	259392	111.082	204.392	2995	24103	246780	171.105	173.483	165.449	398.725	386	4565.03	1940.03	1513.38	12330	44896.4	15180.5	10156.5	7444.36	964.218	930.448	229.961	287.055	444.338	12203.4	523.881	1535.75	1798	1751	1605
265 #01-237 1-76-12	2055.06	5340	3121.88	131479	76732	2310.96	4857.89	7423.56	12824	695052	4.24047e+06	214.377	424.696	2180.52	186669	735.395	3794	114451	1.10276e+06	178302	108.577	238.403	2142	13839	218648	178.284	370.747	274.26	477.89	350	4298.73	1782.7	1658.08	9950.6	36863.7	19919.5	9458.49	7633.31	877.416	694.404	196.975	370.172	443.364	10900.4	408.149	831.103	1494	1622	1311
266 #01-238 1-76-6	2004.34	8903	3420.74	116109	92339	2662.54	2776.17	8109.3	8985.9	633227	3.64054e+06	112.485	447.592	2497.96	315264	454.361	2907	99812.3	1.00872e+06	172531	89.5757	426.015	2648	13107	182622	146.755	291.874	165.333	263.784	303	3838.82	1519.08	1620.33	13048.7	38856.8	17131.6	9024.94	7609.2	926.827	740.948	209.214	393.231	458.457	12337.1	427.673	1663.28	1956	2384	2022
267 #01-239 1-78-1	2050.12	20012	7946.84	125207	100739	3951.58	7469.1	15854.6	15471.2	666291	4.31705e+06	173.647	311.075	3159.73	270383	689.699	2740	122585	1.22646e+06	292902	90.9475	321.997	3153	15095	263956	171.466	158.772	207.134	625.518	831	6652.82	2361.49	1970.37	15604.7	45255.9	25402.3	11874.8	8773.5	1563.89	1381.63	291.092	478.793	589.828	13933.8	527.273	2707.14	2114	2332	3032
268 #01-240 1-78-60	2247.17	10673	5476.63	182342	119866	4336.43	4892.04	9340.71	16490.1	1.05464e+06	3.69712e+06	210.699	433.883	2288.68	321181	832.987	3524	110207	1.15348e+06	505982	94.5662	696.079	3309	22205	304474	188.622	277.945	322.889	820.738	1058	5725.25	1750.69	2182.15	12113.2	41172.5	20692.2	13911.5	7880.97	775.627	627.415	152.097	289.198	446.767	11977.7	427.968	900.124	947	974	919
269 #01-241 1-78-3	1962.43	12174	9274.02	194170	60623	3763.35	9632.5	10064.2	22116.4	767135	3.85122e+06	132.427	403.843	2748.37	327243	1651.19	3587	118567	1.54019e+06	531510	168.734	739.274	3313	22443	349066	125.775	214.694	243.644	730.739	651	6082.55	1960.88	1833.44	12878.5	43310.4	17444.7	14224	9386.25	857.414	590.469	128.176	200.379	410.267	11382.1	394.463	645.72	764	748	1091
270 #01-242 1-78-12	2107.7	13467	8146.78	210051	71889	3137.86	10473.5	12446	30680	850269	5.69207e+06	160.249	546.745	3538.41	274536	911.97	4093	129821	1.74509e+06	263938	190.475	329.172	4423	24597	307819	270.887	298.236	221.244	396.307	617	7464.18	2544.52	2336.49	16564.5	57541	18168.6	15092.6	9302.18	1197.05	998.678	259.086	508.439	494.786	12120.7	428.043	1298.24	1324	1543	2042
271 #01-243 1-79-60	2069.48	8709	4655.85	145295	43239	1988.6	4008.45	6462.19	12299.3	706521	4.13753e+06	86.2298	422.373	1749.35	239049	661.648	3138	87554.6	787269	196296	69.5764	147.714	2247	12194	326449	118.811	239.462	177.876	516.806	347	6779.82	2065.57	3348.61	19959.1	57259.7	19281.8	12970	5339.93	783.419	671.308	104.049	149.348	454.256	9955.74	455.22	701.767	614	575	1033
272 #01-244 1-79-6	2038.56	7135	9234.51	206387	58628	4011.1	10535.2	12459.5	21459.1	1.19714e+06	6.82537e+06	179.021	576.675	3942.47	216914	1221	5705	171121	1.66181e+06	102997	421.245	496.737	5997	24259	176551	352.518	373.676	835.94	889.651	620	10662.4	3147.29	4045.46	29009	132766	25993.7	10652.9	6103.83	654.477	567.979	75.9026	182.138	439.555	10699.4	374.875	358.765	521	664	507
273 #01-245 1-79-3	2259.55	7398	7230.85	200435	50037	2795.31	7960.64	9473.01	18905.5	886857	6.05718e+06	84.4942	601.333	3627.71	206656	1130.08	3720	113065	1.30026e+06	96676.6	371.601	430.941	4765	19086	115821	500.089	318.14	453.468	854.294	331	9756.58	2197.47	2270.21	25785	109461	17383.8	10825.6	6686.36	805.541	629.529	54.3618	187.527	390.365	12045	505.953	574.248	517	887	558
274 #01-246 1-79-1	2042.5	4603	5680.28	179349	35169	3079	7200.56	8460.67	19562.1	940806	5.39167e+06	226.336	475.958	3525.28	222993	979.949	5631	158080	1.26347e+06	87592.9	423.878	353.887	4522	19609	139120	433.868	395.677	467.4	619.411	360	9756.39	2925.77	3231.29	30034.3	123684	28704.4	10233.1	6913.14	584.891	643.577	70.5961	124.479	347.401	11617.1	346.113	427.412	635	547	518
275 #01-247 PQC	2187.64	10559	6181.01	148791	115877	5424.98	8326.13	16550.5	13038.9	931292	5.69186e+06	189.512	549.011	3052.62	437025	811.807	3259	143840	2.13031e+06	354541	143.574	236.615	4856	36286	343101	187.472	283.407	342.304	594.823	811	7026.25	2962.3	2648.18	22478.2	75275.1	28022	11601.3	8339.5	1251.16	1013.08	151.338	331.268	535.36	13302	387.254	1731.1	1920	2370	2015
276 #01-248 1-8-12	2089.53	8201	5414.73	224141	64536	3306.55	7266.87	13625.4	21595.6	794138	6.08066e+06	79.8171	477.208	2742.07	207164	1020.88	5397	123509	1.6107e+06	347096	164.237	477.957	3493	24294	260385	291.642	353.242	241.133	494.359	450	10682.4	4405.44	6394.29	30171.7	72060.3	29764.8	9833.36	5995.79	1024.9	743.507	180.539	446.518	602.444	12110.7	499.847	483.429	707	1231	767
277 #01-249 1-8-6	2058.55	3843	4885.7	248087	63663	1857.35	4551.1	7981.29	13293	709673	3.7933e+06	82.7561	433.742	1600.03	128107	1104.14	2908	83795.2	1.18477e+06	269732	104.023	674.151	2928	17553	224386	124.732	335.979	238.674	389.656	246	4352.57	2419.36	1667.55	11221.5	32600.4	24746.2	9523.37	6281.31	751.411	512.549	127.473	183.528	371.713	9965.58	331.577	319.665	663	872	317
278 #01-250 1-8-3	1962.97	4263	1816.18	116245	61391	1846.25	2738.71	5760.91	8743.07	529697	2.84995e+06	129.443	443.623	2417.26	161862	400.058	3073	129008	1.35017e+06	202346	54.8289	285.389	3067	18607	192800	159.229	249.26	224.312	346.464	357	4071.29	1671.28	1641.93	8624.74	30391	18198.7	8128.61	6843.22	674.31	712.157	195.804	254.288	345.47	11999.3	360.801	772.049	848	1386	1206
279 tQC	2085.46	10489	5319.99	150854	91345	3965.53	6121.18	13542.9	13725.2	819057	5.08896e+06	194.028	508.099	2541.51	316130	537.516	2776	161832	1.56199e+06	306721	151.039	204.049	4060	25291	242766	208.876	244.7	188.696	403.156	640	6596.16	1960.97	1667.98	14798.2	50677.4	21005	12390.9	8247.38	1019.4	1043.74	178.953	220.345	417.798	12577.3	467.136	1428.8	1748	1545	1527
280 #01-251 PQC	2171.86	8771	6434.7	181491	112571	4279.92	6501.76	12726.6	14041.4	743533	4.88214e+06	133.627	596.535	2561.71	262753	561.928	3452	150158	1.82781e+06	341531	85.5297	249.364	3211	30336	274399	201.686	196.243	112.732	541.671	610	5769.74	2365.33	2004.85	14176.7	51598.8	17590.5	11399.9	7570.14	916.488	990.688	288.257	361.206	420.763	13245.3	441.474	1414	1723	1907	1536
281 #01-252 Blank + ISTD	1904.85	111		332.528	259			67.5467	321.978	1524.3	5067.31	16.5082	432.396	240.28	686.805	117.457	44		1384.85	236.397	17.267	45.74	3	4	168.49	117.157	28.2892	30.9388	37.2027	0	254.932	195.411			250.157	47.1991			700.68	519.608	122.152	194.535	346.943	9773.66	424.931	160.983	412	508	466
282 #01-253 1-80-1	2074.88	11491	5807.48	177906	99167	3636.29	7790	14134.5	19232.5	818167	4.8631e+06	135.464	400.701	2296.26	291896	493.059	3861	183764	1.6156e+06	629258	90.2745	277.153	3556	22745	216857	158.317	228.241	197.563	440.112	861	5603.65	1983.06	1886.98	11460.6	40871.3	17713.3	11236.4	8149.12	947.464	903.214	175.881	368.56	386.956	11679.6	467.117	1377.34	1200	1416	1662
283 #01-254 1-80-6	2043.17	7212	5447.38	161477	106313	3822.34	8387.74	16038	21393.4	866606	4.63258e+06	112.413	522.582	2790.82	446383	781.722	4385	186551	1.41659e+06	383348	147.163	282.94	3239	24104	245495	164.167	211.023	107.809	364.813	482	6355.02	3101.08	3460.19	22576.9	51161.8	23483.4	12640.2	7617.12	1332.26	1073.53	267.318	359.171	506.081	12508.6	611.886	1622.06	1446	1687	1907
284 #01-255 1-80-3	2079.82	7489	4397.06	185134	79985	3018.09	6531.91	15046.3	18829.2	791081	4.4256e+06	90.8403	504.493	2287.66	299763	913.676	4468	187931	1.45609e+06	295255	109.144	219.471	4210	25437	182810	147.949	258.065	238.572	298.237	650	5240.14	2117.61	2176.66	15003.8	50500.8	18940	13392.8	6781.25	727.674	538.928	82.0999	116.634	391.389	9948.12	408.352	475.122	430	631	722
285 #01-256 1-81-6	2079.78	5234	2103.27	154053	71881	1818.7	3179.71	5264.63	18667.1	733142	5.14902e+06	164.751	596.237	2872.22	197763	577.086	2918	127818	1.00132e+06	93804.9	291.311	313.085	3158	16399	184435	314.942	458.273	329.715	827.783	266	7142.6	1803.51	1952.79	14443.5	49896.2	21744.5	9340.35	7455.61	1062.61	833.168	178.122	295.345	425.898	14264.9	451.962	1164.51	1841	2297	1632
286 #01-257 1-81-1	2174.74	3475	2626.65	130976	62872	1162.46	3723.4	5822.02	11038.6	744371	4.40311e+06	104.113	539.409	2318.01	146580	650.1	3131	126223	1.04155e+06	114168	138.339	475.899	3604	15038	218023	172.329	245.544	192.18	382.426	220	5324.46	1667.61	2054.98	12574.7	40493.8	20432.6	7869.6	5133.87	510.708	649.507	64.3774	171.019	469.23	11045.6	460.937	557.583	742	976	716
287 #01-258 1-81-12	2228.11	4113	1376.2	91984.3	31003	1357.11	3275.38	2870.03	11675.4	464764	4.68882e+06	127.64	614.643	3088.59	177968	354.149	776	41964.6	1.10954e+06	72186.7	332.32	265.944	1897	10573	129746	425.595	294.913	111.44	107.256	47	8006.43	2435.78	2027.51	22669.6	75303.6	20238.9	11677.5	8702.66	2053.98	1899.46	274.354	343.772	886.107	25479.9	995.88	3068.3	2290	2826	3263
288 #01-259 1-82-12	2038.16	3202	5147.42	173738	60453	2693.76	7849.85	11741.6	24525.5	807929	5.25275e+06	169.266	555.445	3032.19	350337	1009.77	3896	123906	1.85298e+06	212458	230.072	442.573	4476	23378	216421	295.938	513.182	309.905	512.751	479	8653.77	2751.76	1806.63	16130.6	62906.4	24063.2	12397.3	8285.83	896.269	771.542	109.766	314.4	427.133	11887.1	401.327	476.665	915	1030	775
289 #01-260 1-82-3	2111.77	4231	5474.18	246438	80556	2112.05	7298.91	12996	29126.4	1.10285e+06	4.74991e+06	123.133	656.478	2452.87	244750	1094.62	4602	180995	2.56749e+06	371428	213.454	418.094	5936	38060	468947	183.704	318.821	383.525	664.943	554	7418.05	2934.76	2227.03	16186.3	49698.9	28261.3	13503.3	7909.35	709.063	609.332	105.661	173.392	442.171	12075.2	453.622	503.914	564	879	667
290 #01-261 1-82-6	2100.07	2883	2520.89	195951	44683	1444.33	3855.29	7888.55	19085.2	853627	5.23684e+06	141.186	613.004	3426.13	223309	852.531	3853	80326	1.51537e+06	175225	157.428	248.426	3978	20484	268641	178.211	311.813	263.498	487.367	357	6872.99	1881.62	1750.64	18685.8	61228.4	20593.1	11643.9	10084.8	764.024	566.932	108.25	150.263	398.49	12149	419.371	681.759	832	977	774
291 #01-262 1-82-1	2153.56	3177	2787.55	156713	62183	1722.76	4994.23	7139.78	17951.4	923230	5.11315e+06	224.98	400.514	2603.62	260061	749.147	3898	134052	2.26173e+06	273940	140.976	356.086	4347	27648	304035	155.229	298.732	254.69	631.966	561	6605.99	2607.56	2437.52	15778.7	48478.6	22700.6	12640.7	8006.74	843.278	598.271	154.543	247.062	418.911	10795.9	417.647	682.525	796	1009	819
292 #01-263 1-83-6	2028.37	6645	3605.13	168126	45869	1952.88	4671.98	6368.25	11761.9	572219	4.43909e+06	139.8	474.425	2528.24	158408	648.176	3308	127283	1.15107e+06	146133	154.779	221.356	3722	16890	308052	159.193	233.712	140.34	400.731	648	4608.06	1672.02	1232.81	9559.25	31812.6	16293	9126.2	6920.92	837.1	740.198	146.349	203.516	436.22	11419.5	491.01	568.222	745	1312	849
293 #01-264 1-83-1	2033.4	7027	2709.52	119393	75118	2456.83	3034.62	5814.55	9418.64	606948	4.62138e+06	146.399	447.029	2599.68	185550	716.676	3157	175386	1.37134e+06	380990	63.4179	412.456	3342	25940	288426	147.494	146.071	91.1272	384.943	793	5474.65	1426.82	1223.52	6724.46	24029.2	12880.6	11039.3	8432.56	1049.41	1014.12	298.187	525.396	460.109	11927.7	431.781	1614.17	2004	2124	2321
294 #01-265 1-83-3	2123.57	5230	3305.39	188580	50706	2865.5	4597.4	8465.52	16752.5	760962	5.27194e+06	208.242	472.848	2960.71	192748	739.639	3714	171979	1.51696e+06	360469	126.283	542.572	4058	25524	556286	222.872	454.502	199.556	654.784	692	8316.44	2064.89	1954.69	12200.1	45836.6	23799.4	11385.7	7696.67	701.89	632.806	112.438	158.819	479.15	11354	509.139	572.193	1118	1257	848
295 #01-266 1-83-12	2008.82	7481	5616.78	212931	54938	2463.31	6255.17	8321.3	15415.6	698479	5.77365e+06	256.489	486.724	3798.51	166817	905.065	3027	147826	1.34313e+06	397804	134.584	745.322	2768	21637	433214	192.712	361.922	328.259	529.404	449	5678.07	1018.8	1158.37	7964.81	29870	16047.7	11542.2	6759.34	629.917	560.21	61.0105	211.816	348.956	10077.2	495.44	429.646	422	582	540
296 tQC	2105.79	8680	5211.31	142257	98623	3592.77	6626.78	9989.31	12077	768962	4.52804e+06	158.513	485.532	2432.87	288719	706.57	2333	168774	1.71697e+06	259739	105.02	113.616	3262	26201	239054	202.386	248.551	144.38	379.628	396	5459.81	2007.2	1529.03	13036.5	46530.5	17928.3	12523.8	8091.79	873.415	732.229	154.382	219.925	400.112	12995.4	409.257	1424.16	1780	1747	1381
297 #01-267 PQC	2196.33	9672	5760.42	137907	79643	3777.5	6076.99	10345.5	13929.9	717173	4.34069e+06	209.638	468.592	2423.44	277856	498.094	3281	165818	1.47356e+06	279522	113.697	217.289	3033	24644	231034	154.857	192.068	177.803	464.059	517	5230.75	1654.52	1608.41	12952.7	41270	16864.5	12750.5	7422.81	1068.26	905.236	248.879	309.514	477.468	11532.7	461.896	1520.93	1360	1527	1574
298 #01-268 1-84-6	2146.94	8002	5820.26	156580	62038	3168.39	6491.68	7803.13	16032.2	736134	5.33571e+06	228.579	429.163	3321.54	270624	925.511	3749	122189	1.4906e+06	359889	64.8066	273.286	4308	26458	279201	209.703	230.148	400.026	717.44	1347	3714.85	1009.47	956.562	8567.15	28930.9	11790.4	11127.5	9020.9	676.931	610.453	111.367	148.3	406.661	10006.5	374.037	627.312	369	506	670
299 #01-269 1-84-1	2208.53	11958	8319.64	183076	95767	5226.44	11082.9	20764.1	17354.8	1.05357e+06	5.35765e+06	144.835	504.623	3919.59	374918	862.516	5195	162527	1.39399e+06	398713	93.645	418.25	4826	31289	270081	228.477	284.609	252.294	424.789	1126	6574.23	2621.18	2214.82	15628.3	55428.6	24279.3	12505	9291.39	957.496	766.946	179.446	298.171	408.248	11214.6	512.449	1121.01	951	1238	1539
300 #01-270 1-84-3	2076.27	7403	4898.33	157472	46991	2159.52	6092.36	6866.62	15823.7	643791	3.55793e+06	154.503	498.747	2375.84	273093	638.862	3425	108419	1.37362e+06	330422	137.779	368.216	3098	18886	288572	181.615	249.872	236.975	641.877	700	4978.68	1407.08	1179.52	6681.29	23097.9	13639.6	10991.1	7314.02	1413.69	919.812	296.465	433.782	452.782	12659.6	475.741	1749.9	1046	1472	2039
301 #01-271 1-84-12	2042.1	6128	5861.33	174718	63356	2876.55	8676.19	11167.4	18684.1	779504	6.57902e+06	268.901	711.028	2649.19	239974	807.706	4307	120101	1.59927e+06	133879	123.016	262.521	4040	29000	265358	210.599	226.112	377.133	646.922	748	5591.43	1788.98	1384.95	11371.3	41769.1	16345.9	13269.9	9678.43	645.563	456.163	123.138	201.87	484.656	10143.8	401.793	548.293	661	894	575
302 #01-272 1-85-60	2078.96	5148	2806.18	145538	53438	2196.09	4364.91	7952.22	12895.8	972946	6.04737e+06	118.293	472.553	2788.34	241438	573.213	2667	65471.8	1.32962e+06	638021	122.544	379.914	2515	15665	333845	190.739	267.731	188.746	643.037	269	7506.96	3446.28	4653.92	22713.8	55319.9	26841.4	14877	12691.1	989.264	726.174	261.464	452.692	563.257	12708.7	488.163	778.811	1222	1313	1011
303 tQC	2259.26	9191	4828.31	126109	93255	3715.68	6795.94	11066.2	9921.91	688858	4.4162e+06	193.155	484.831	2430.79	302823	620.638	3439	147822	1.71586e+06	256856	125.238	291.243	3364	23362	245612	131.37	238.735	178.031	499.181	481	5345.11	1980.67	1803.59	12279	46482.1	16665	12975.6	8666.42	987.744	715.096	256.609	311.082	417.166	12565.3	433.392	1466.07	1421	1862	1779
304 #01-273 PQC	2081.57	11251	5423.76	316491	84273	4733.24	11619.6	11846	22858.7	883650	5.2658e+06	190.984	490.226	2852.67	354473	539.824	3147	197802	1.84325e+06	304396	140.431	334.615	4287	30736	290037	290.919	250.552	309.8	481.198	563	6738.85	2422.87	2372.7	17763.3	66002.7	23862.3	12732.2	8238.56	1051.17	1248.49	220.064	384.033	544.694	14471.7	518.232	1465.02	2120	2043	1984
305 #01-274 Blank + ISTD	1959.12	29		536.546	201		15.6374	140.76	212.408	986.452	6257.32	18.3583	311.897	300.112	657.926	67.3625	27	141.812	1422.03	149.765	41.9307	80.824	7	22	246.151	96.7833	46.1592	42.0218	40.1023	12				91.6251					642.551	592.062	124.629	254.974	414.543	9619.49	454.987	132.446	272	311	97
306 #01-275 Unextracted blank	1933.23	140		645.296	258			131.87	159.423	1299.41	4712.67	26.9561	288.038	296.98	679.257	96.9094	26		1060.9	142.12	25.8213	113.239	23	22	164.837	96.9787	48.5968	43.3218	41.0617	0	95.2871								765.521	541.634	168.856	285.927	445.151	10412.9	374.695	160.75	346	455	321
307 #02-001 Extracted Blank	1978.2																																		202.578	62.6101			659.913	591.59	151.91	228.343	427.978	9805.33	402.497	189.881	265	503	342
308 #02-002 Blank + ISTD	2011.09	25		1138.67	329			82.4567	228.567	810.201	4576.47	13.8922	319.388	344.718	543.856	59.5135	132		748.034	179.83	20.5514	86.4809	0	0		98.1389	27.6143	48.6836	41.2259	0				117.731					601.601	601.46	65.3512	181.051	385.723	9657.21	449.425	121.923	197	371	152
309 #02-003 PQC	2231.06	10369	5396.16	157671	90656	3856.91	6764.47	11623.4	13313.2	688947	5.08936e+06	233.102	592.008	2550.92	272505	498.957	2229	133191	1.83121e+06	289885	86.1028	164.954	3547	24114	273878	216.537	186.59	197.26	428.212	658	4683.96	1774.12	1649.78	12934.7	46636.9	16395.9	11815.9	8330.69	1137.31	908.735	257.085	389.06	514.712	12736.4	459.631	1597.84	1836	2215	1731
310 #02-004 Blank + ISTD	1954.25	23		1404.94	258			117.543	110.149	1380.25	3877.55	63.9099	384.643	291.255	636.433	66.5294	0		1165.17	135.708	25.3717	90.2925	19	23	226.829	95.3842	43.9082	39.621	61.9991	14			59.3684	106.618					489.488	614.314	76.5774	156.677	397.256	9281.69	405.783	159.737	197	386	165
311 #02-005 1-85-1	2123.71	6477	6346.89	211255	65448	3208.89	8323.39	14723.4	23233.6	1.14604e+06	5.71376e+06	213.253	707.931	3497.71	319670	1494.64	5619	159158	2.09237e+06	280569	218.344	509.317	6363	25814	263030	207.274	506.64	866.686	1257.52	640	9943.35	3955.98	4011.97	20563.6	55308.9	32136.9	19564.6	12852.8	854.533	458.133	114.132	228.267	412.05	11784.9	406.863	588.697	903	1187	1066
312 #02-006 1-85-3	2107.83	4204	3472.01	173838	74823	2501.88	5629.98	10726.9	22512.4	964298	4.73616e+06	284.718	720.86	3355.41	215082	992.534	4291	101794	1.54506e+06	163012	169.195	354.422	4870	20316	196091	351.681	295.987	500.773	899.61	247	7095.81	2479.36	2996.06	20269.9	53319.7	22300.7	18078	11206.7	1015.1	772.047	207.414	369.695	429.297	11847.4	403.61	918.603	1000	1285	1204
313 #02-007 1-86-6	2224.5	11141	6081.71	138165	118848	3370.07	5976.45	11667.2	12187.3	605005	4.2184e+06	145.931	558.819	2850.23	376835	202.971	2482	136785	1.26688e+06	350379	114.626	222.927	2896	25233	335198	125.169	159.767	234.101	473.175	627	5822.03	2177.55	1762.33	16205.8	52391.3	20075.1	14589.7	8695.18	944.166	758.629	335.727	399.091	584.107	15546.3	525.29	1636.85	2326	2641	1930
314 #02-008 1-86-12	2177.69	10317	4928.98	116990	110564	4918.32	4406.56	8377.65	8719.08	627957	4.1697e+06	267.634	1171.36	3844.87	260886	251.579	2091	117859	1.45803e+06	574273	174.7	263.912	2862	21075	465428	193.545	284.939	207.357	694.395	1022	5407.37	2170.78	2277.81	13031.7	48900.2	17890.4	13527.8	11128.6	3001.17	2126.32	832.475	1139.6	794.615	21636.2	711.417	4548.96	6115	6714	5651
315 #02-009 1-86-3	2075.19	10364	3304.08	87554.9	59641	4422.4	3041.48	5102.9	7054.81	462061	3.64214e+06	160.586	913.343	2703.24	245408	408.26	1823	75583.2	754395	401908	117.107	194.473	1541	13907	209329	152.121	200.059	139.487	491.513	542	3657.53	1285.47	1157.8	10488.1	42695	16140.2	10269.6	6940.86	1800.47	1482.7	464.272	553.88	603.06	12339	502.703	2551.6	2232	2294	2898
316 #02-010 1-86-1	2130.95	12319	5262.36	125468	112650	6314.14	5437.96	10798	12948.7	655926	5.71499e+06	217.474	595.289	3174.65	365656	616.261	3356	180576	1.35312e+06	577809	108.177	619.483	2938	24222	303891	172.972	308.962	218.483	675.759	1064	5609.69	1790.58	2188.25	12861.1	51384	21479.6	17213.4	10546.9	1195.25	924.486	487.682	608.306	474.988	13874.9	525.182	2324.25	2516	2750	2796
317 #02-011 1-89-60	2237.73	6331	3545.21	128045	62170	1947.49	5478.93	9055.85	18282.4	858697	4.56986e+06	153.711	506.674	2677.4	247559	988.233	3536	109521	1.06178e+06	242621	157.082	332.892	2442	16900	251717	252.275	232.803	407.413	1212.59	393	6207.63	1964.48	2621.4	17206.8	55509.5	19700.4	14361.4	9323.7	916.179	813.18	195.461	245.046	480.053	12132.4	462.062	864.41	1189	1181	1171
318 #02-012 1-89-6	2212.2	3251	2927.05	125463	68502	2171.13	4720.13	5147.45	12496.8	746079	3.85477e+06	179.139	587.743	2645.61	187088	728.658	2608	71847.2	940350	157960	197.828	263.276	2986	12940	304670	176.149	187.528	173.255	441.594	274	5397.57	1497.82	1344.49	10298.6	39273.3	17706.4	12202.8	7752.8	934.632	703.83	215.393	322.791	431.386	12452.4	426.055	1379.58	1303	1928	1410
319 #02-013 1-89-12	2088.44	6105	3921.67	144126	75789	2004.99	5892.06	9452.59	22833.7	668280	4.42884e+06	143.922	543.898	2399.66	196654	659.071	3923	100067	1.11446e+06	139442	128.653	315.712	4038	19030	246345	244.745	259.808	316.19	598.995	311	5840.86	1738.25	1405.78	12503.8	34291.5	19936.8	11721.2	7118.46	974.77	767.821	157.349	190.145	452.628	13752	548.723	1004.01	985	1145	1387
320 #02-014 1-89-3	2145.45	8049	4675.1	176570	96511	2748.18	8177.6	11248.9	18682.9	742389	4.52231e+06	156.898	544.369	2439.45	220346	671.734	3873	140246	1.32466e+06	212047	109.844	425.526	3739	21609	312952	209.074	285.583	271.415	616.622	401	6001.06	1846.31	1693.31	12844.5	53063.7	21565.3	11589.9	7757.44	905.55	742.942	147.183	229.097	397.819	11151.2	403.77	887.127	1343	1440	1055
321 #02-015 1-89-1	2246.88	5550	3289.99	177262	59897	2800.12	5693.71	9372.1	20713.8	873438	4.63434e+06	154.402	555.35	2685.72	212776	1363.2	4174	133876	993467	312859	216.852	111.904	3290	21073	346137	253.326	268.985	252.537	752.015	350	6069.53	1716.89	1406.18	13685.3	51236.8	23493.3	10831.5	8133.41	713.263	603.211	115.103	253.804	486.392	10587.3	455.026	577.081	697	887	756
322 #02-016 1-9-3	1980.05	6738	5840.12	230154	58707	2318.77	7551.97	7385.51	25871.1	902445	5.32312e+06	109.671	577.727	2675.94	357523	1001.3	3302	141795	1.61216e+06	302902	106.047	212.302	3075	18251	313629	194.392	233.116	296.82	354.201	648	5499.75	1706.32	1693.15	12569	39326.3	15936	10916.7	7321.03	691.182	623.548	104.595	170.785	452.931	10756	378.252	568.732	402	799	917
323 #02-017 1-9-1	2108.37	5651	4892.83	214455	48725	2424.59	6115.8	6404.06	21239.3	688253	4.35488e+06	106.722	561.651	2325.65	280111	1225.28	4141	140406	1.41201e+06	320508	143.518	765.979	2845	13919	232613	273.366	473.616	271.703	695.628	617	4958.53	1273.01	1696.88	12415.7	34313.5	20687.5	10077.7	7600.95	593.782	617.454	89.5779	170.937	386.463	9848.03	354.882	366.793	439	446	406
324 #02-018 1-9-6	2078.13	6021	6727.34	204147	49445	2079.89	8851.6	11450.8	18237.7	818896	5.14528e+06	96.2728	512.924	1995.46	291808	1186.82	2931	98740.3	1.5417e+06	419478	94.6271	456.221	3421	15834	342086	191.265	306.488	213.457	644.403	517	5782.35	1824.93	1688.38	10591.4	35270.8	18523.4	10647.7	7566.56	547.842	497.214	79.2225	178.541	342.378	10584.4	389.388	304.84	494	505	395
325 tQC	2311.46	10470	4793.36	124434	91158	3948.82	6545.46	11304.5	11945.7	781963	4.72666e+06	220.081	498.634	2392.85	257028	446.414	1976	175608	1.65364e+06	252546	162.884	309.32	3254	25612	258639	223.358	191.988	202.686	437.98	529	5676.53	1835.95	1675.72	12282.8	42759.1	15783.7	12583.5	9069.7	1157.09	758.459	187.581	357.843	443.377	13447.4	454.371	1507.18	1599	1494	1811
326 #02-019 PQC	2199.1	8442	5140.69	148779	89415	3446.54	5855.01	11529.1	11426.6	706173	4.32875e+06	207.023	514.412	2437.85	303885	618.55	2884	161887	1.63134e+06	298452	151.455	307.93	2821	26673	252630	168.533	267.683	308.622	430.27	624	4243.83	2066.22	1755.89	13328	44317.6	16327.1	12302.2	7987.38	1010.55	874.687	184.342	334.684	403.475	12575.7	558.18	1569.36	1570	2031	1917
327 #02-020 1-9-12	2021.87	8587	6645.31	233508	54991	2655.08	8371.68	9522.4	19074.6	987334	5.15197e+06	211.046	451.264	2737.88	368191	1027.55	3195	136974	1.55278e+06	436644	94.7075	498.036	3206	21106	333483	178.291	352.776	387.905	788.338	601	6691.41	1571.36	1699.35	12733.2	51332.6	25051.2	11245.8	5314.15	657.775	482.359	115.932	207.742	507.606	10419.1	407.519	384.7	650	659	931
328 #02-021 1-90-3	2039.7	7291	3188.39	145038	113637	3767.77	4216.03	9677.45	10955.3	757940	3.48748e+06	98.13	609.974	3510.98	436168	581.953	2134	107008	1.46707e+06	394654	92.1156	470.753	2830	16003	221461	164.556	324.607	226.581	176.869	470	4893.64	1407.25	1446.49	12891.6	41827.9	17199.1	12461.4	7814.61	2517.92	2268.61	515.883	694.882	879.957	20372.4	1090.77	2868.62	3090	3472	3504
329 #02-022 1-90-12	2159.83	8257	2945.81	96916.8	86534	3274.58	3217.15	7773.65	9148.09	608233	3.48235e+06	160.415	906.394	2800.63	255780	527.592	2737	130855	1.78101e+06	244023	77.9052	181.878	2946	17524	200177	165.298	187.982	174.674	268.826	521	3985.89	1299.91	1372.4	10205.1	32327	14475.7	11505.6	8056.22	1073.33	958.779	211.827	416.375	470.357	13355.9	463.392	1467.75	2029	2290	1442
330 #02-023 1-90-1	2105.29	7283	3110.61	135754	71137	2049.79	3772.92	7469.95	11400.7	565732	3.4927e+06	89.9082	498.789	2514.15	192916	619.889	3565	105538	1.99519e+06	216502	63.5855	214.869	4276	18758	207723	163.501	320.799	242.324	549.072	592	5368.97	1838.89	1777.87	10320.4	27167.5	16221.4	9895.09	7157.47	938.792	785.942	214.271	334.63	572.565	12695.6	467.341	1409	1270	1649	1404
331 #02-024 1-90-6	2131.79	7343	2249.53	121797	100053	2363.54	3321.72	8289.25	9039.87	615120	3.5218e+06	161.796	726.833	2538.74	241434	251.435	2373	126236	1.54885e+06	174597	99.0898	231.523	3335	18903	227749	195.997	239.641	210.466	445.249	468	4557.12	1425.16	1480.38	8063.28	26442.7	14278.1	11326	7698.17	1229.92	1029.84	312.433	386.714	499.985	15007.9	525.652	2080.31	2390	2778	2445
332 #02-025 1-91-6	2120.16	8375	4144.85	104101	78435	2889.05	3706.66	8348.72	9685.99	557590	4.27864e+06	184.602	487.212	2865.62	199191	543.054	2934	155225	809294	182631	100.64	255.371	2817	14875	177990	231.929	349.44	216.346	544.16	564	6418.28	2127.24	1709.66	10544.1	33795.5	18613.9	10097.4	7192.34	816.144	799.99	177.042	283.419	378.25	12215.4	422.729	816.313	1121	1322	1162
333 #02-026 1-91-3	2219.43	5009	2324.23	100989	62159	1685.83	3303.39	5417.81	9951.08	546702	3.37391e+06	118.433	551.012	2658.08	139575	485.068	2292	99401.3	791995	104296	111.824	200.67	2620	12776	174169	221.6	173.978	137.559	260.876	235	5810.27	2002.65	1619.96	9657.67	28272	17905.8	9162.05	5513.35	805.622	658.463	165.814	320.91	516.753	11892.4	437.807	1048.29	1183	1502	1124
334 #02-027 1-91-12	2174.66	6476	3284.79	115881	74779	2393.48	4483.91	6984.22	10243.4	597389	3.89658e+06	227.084	593.165	3071.71	181095	628.993	3068	116624	1.00168e+06	135339	96.8586	235.571	3975	17513	193119	140.649	275.067	176.748	509.895	523	6372.49	2441.38	1958.35	10797.3	33669.2	17725.7	10345	6567.54	1053.51	843.307	301.846	481.64	352.152	11894.5	491.126	1611.21	2171	2378	1932
335 #02-028 1-91-1	2134.73	5575	2425.05	104225	63809	2436.26	4462.6	6424.64	10650.3	566562	3.96258e+06	109.04	503.641	3149.34	140143	674.511	3506	135994	901952	177313	82.1584	217.142	3060	18014	233871	214.647	279.942	272.147	447.318	466	6106.6	2091.75	1575.11	8298.76	27956.9	20492.9	11268.7	7480.37	954.835	922.404	367.634	463.082	459.9	11553.4	434.278	1258.09	1760	2292	1732
336 #02-029 1-94-6	2135.94	6784	5032.25	189819	47448	2011.66	5019.71	7632.75	24795.5	889561	4.31987e+06	107.686	564.562	2476.64	191866	1005.4	3611	99208.1	1.16668e+06	173132	191.127	385.078	4053	16185	225665	250.4	347.242	312.321	300.65	367	5767.52	2051.88	1881.32	12198.6	39706.5	17608.5	10612.3	6396.09	718.46	623.049	111.349	231.023	499.987	9944.17	361.683	492.327	654	871	559
337 #02-030 1-94-12	2133.56	4486	4244.41	142981	32690	1662.82	4522.15	6568.62	16865.2	697584	3.13357e+06	232.853	573.97	1565.95	139534	640.706	3274	87839.4	962899	198214	167.965	271.617	2714	17021	206393	165.301	321.601	325.956	319.175	319	6275.26	2053.28	1552.61	7942.6	29734.9	15162.5	9373.01	6224.41	731.976	529.531	254.414	475.416	408.325	10653	299.791	489.019	933	1206	520
338 #02-031 1-94-60	2213.91	5767	3983.19	128021	49906	1863.78	5416.55	7564.28	12308.9	652008	3.57776e+06	99.7623	425.58	2045.49	144488	939.349	3233	80823.3	906287	131823	90.0161	329.993	3133	12468	183029	181.12	304.876	248.843	339.942	383	5164.72	2255.33	2601.54	13093.3	39517.4	16158.2	9626.07	6207.1	778.314	614.036	133.264	164.151	391.372	10139	482.649	448.27	661	820	662
339 #02-032 1-94-1	2051.57	4586	3028.88	147412	43648	1384.22	4783.38	7343.51	11557.3	736624	4.41884e+06	366.61	411.824	2043.34	138834	876.964	2905	111104	1.24743e+06	150582	95.6065	316.701	2921	17640	195103	179.397	337.692	152.06	295.713	344	5629.45	2018.95	1433.11	9911.51	34523.6	19870.9	8989.39	5254.08	700.358	518.074	108.51	181.024	452.034	10080.8	378.278	371.01	416	521	627
340 #02-033 1-94-3	2245.19	3508	3432.62	146344	47241	1410.22	4584.06	7243.78	16496.6	713831	3.48281e+06	49.0377	449.24	1889.61	101146	741.033	2744	87171.2	951186	113435	112.46	246.69	3376	12708	177790	136.706	185.996	210.671	400.024	239	5325.06	2214.51	2127.03	10654.7	29687.3	17787.4	10770.1	6916.03	519.527	551.963	112.965	93.4664	405.739	10146.2	481.29	402.833	462	397	190
341 tQC	2133.23	9573	4890.01	149384	102551	3570	5027.41	10556.3	11992.3	704446	4.20438e+06	256.486	454.359	2299.47	268030	466.449	2740	151082	1.65672e+06	245424	109.597	117.646	3041	20474	261490	187.138	137.668	127.799	317.568	438	4467.16	1774.84	1611.02	12270.7	44048.4	16909.8	11780.6	9166.91	957.901	777.715	218.806	230.92	427.446	13385.7	389.434	1411.26	1687	1867	1657
342 #02-034 PQC	2043.78	8393	4763.47	134698	86251	3934.67	5167.24	12268.9	10343.9	748686	5.20182e+06	248.419	494.873	2333.68	289514	648.376	2303	155222	1.67896e+06	289275	66.6571	266.491	3392	26715	252856	194.422	221.857	122.573	311.782	638	5077.45	1774.26	1736.91	13654.8	41942	17678.6	13831.7	8823.41	978.575	741.036	195.254	403.51	457.472	13612.7	555.892	1520.03	1605	2155	1338
343 #02-035 Blank + ISTD	1983.3	65		1130.02	312			70.7816	145.205	946.425	3233.27	39.7575	261.454	308.51	607.22	111.076	6		650.913	158.126	34.1811	50.2664	25	71		84.7423	22.0053	49.7719	40.5987	0									756.995	391.261	101.329	196.025	351.075	10121.5	360.808	159.581	207	344	422
344 #02-036 1-95-6	2121.78	4939	4610.77	156580	82060	2913.27	7499.47	10861	23878.2	931414	4.96352e+06	147.491	579.434	2143.55	252984	975.038	4125	169044	1.18026e+06	150865	207.023	240.287	3982	18984	161874	246.159	281.258	370.692	591.291	464	7219.88	2189.75	1728.07	13842	39800.6	18275.4	11795.4	8764.79	816.71	431.179	143.389	239.907	288.333	11302.2	355.419	525.803	869	749	567
345 #02-037 1-95-3	2120.39	6746	5344	174355	72704	2285.22	7137.92	10844.6	24136.6	827403	4.50328e+06	129.539	525.437	1985.7	232153	1429.95	4823	172046	1.29581e+06	153680	168.752	279.481	3075	23194	191051	189.952	307.66	406.384	475.566	538	6168.05	2473.1	1676.04	10783.1	38207.3	15827.3	12821.8	8342.9	620.621	572.385	110.548	141.766	427.546	11611.1	421.112	522.875	598	936	492
346 #02-038 1-95-12	2046.51	9664	5374.02	246220	71566	2985.04	8398.7	13048.4	25968.2	1.01212e+06	5.70902e+06	219.187	566.72	2777.49	340085	1249.95	5461	185964	1.34063e+06	156623	187.989	357.522	6739	25885	158562	177.591	278.141	346.196	776.16	395	9308.63	2901.06	2234.04	16567.6	54252.8	19977.3	13065.1	9040.06	838.914	852.042	150.597	307.517	567.449	12473.2	489.701	783.485	1064	1213	979
347 #02-039 1-98-6	2232.63	6115	5182.79	131934	43321	2189.09	4406.08	7846.53	11556.8	599165	4.16572e+06	165.022	505.528	2143.85	182058	592.98	2559	95754.3	829522	151482	72.227	219.687	2481	18251	202165	176.279	228.06	229.214	470.697	424	3259.92	1421.49	1366.61	8200.23	28916.8	12805.7	9811.36	6506.4	634.893	579.969	117.954	200.159	480.161	10587.7	389.232	512.564	452	1033	809
348 #02-040 1-98-12	2094.8	8803	4765.68	132297	75671	1961.1	4953.04	9395.68	12416.5	614093	3.43263e+06	208.016	511.286	2333.15	234914	593.874	2187	131396	700636	158503	95.9358	348.991	2635	19256	157795	191.678	293.327	158.363	509.532	436	4122.58	1771.53	1737.32	10657	39733.5	14305.1	8906.7	7084.02	691.601	734.916	127.309	212.596	427.333	11330.9	414.111	893.997	1109	1144	1028
349 #02-041 1-98-3	2174.63	5910	4566.82	157365	69911	1924.06	5323.07	8894.95	16561.7	797517	4.24628e+06	152.954	525.145	2169.08	211045	843.265	3104	154435	1.11881e+06	160280	140.09	298.13	3973	22864	243023	142.603	217.512	366.604	580.69	762	4409.8	2328.39	1948.58	11351.2	43517.7	16192.8	9920.65	7421.59	711.388	352.612	102.719	175.373	508.906	11289.4	330.323	552.296	620	870	648
350 #02-042 1-98-1	2129.12	8128	3594.15	96908.4	66030	2665.94	4104.03	8642.6	11630.1	539717	3.68563e+06	135.974	532.827	2953.62	257536	539.14	3292	145586	881822	157235	84.9122	146.293	3089	19765	157421	173.482	204.851	139.512	530.812	1164	5880.02	1700.99	2272.78	11331.8	35684.4	17449.4	10693.2	6447.89	1341.79	1134.16	341.307	486.481	487.977	13500.1	478.904	2490.45	2258	2669	2436
351 #02-043 1-99-3	2161.28	5374	3925.14	171938	101872	2735.38	4556.52	11055.7	17532	838422	4.95737e+06	155.049	512.535	2699.85	239139	1257.72	3361	121992	1.50749e+06	460107	167.844	991.641	4540	22502	442955	194.562	497.304	366.8	553.356	431	5931.54	2264.74	1869.34	13224.5	40622.8	19722.8	12304.1	9191.33	757.968	588.27	106.737	219.168	527.106	11952.6	374.96	775.779	740	855	718
352 #02-044 1-99-6	2054.23	6700	2717.89	149966	93531	2978.1	3781.15	7628.74	12855	643909	3.93425e+06	80.5613	466.309	2668.96	265944	1249.35	3988	165355	1.32837e+06	439418	107.822	637.102	3466	18514	294714	221.445	431.964	276.824	596.275	594	4787.55	1475.38	1325.25	8113.27	29755.3	16465	11166.2	6952.51	709.105	674.276	140.194	251.211	355.469	11079	430.391	649.894	922	1070	977
353 #02-045 1-99-1	2033.31	10102	4610.64	149935	156547	5158.85	5568.88	17295.4	16343.5	998247	4.29107e+06	164.328	460.381	3148.46	410525	683.478	5324	207722	1.27606e+06	300031	114.139	336.278	4596	23786	189094	211.253	366.631	318.316	694.748	783	7473.23	2627.58	2383.8	15172.6	54780	23026.4	15698.5	9903.01	756.034	811.275	254.084	362.585	550.872	11843.2	454.921	982.587	1363	1656	1150
354 #02-046 1-99-60	2193.86	5130	3932.31	186383	104246	3079.08	3997.41	9265.27	14999	980538	4.22096e+06	110.269	410.402	2529.77	199240	2016.16	3925	90825.7	1.42449e+06	514016	168.624	1130.14	3217	21568	404107	233.808	677.155	266.601	502.284	488	6723.78	1893.88	1993.35	10671.2	34552.2	22646.8	12228.7	10725	712.35	616.498	157.584	258.871	437.4	10338.9	491.193	392.767	661	847	802
355 #02-047 2-2-1	1992.8	6389	3727.93	132200	55320	2411.11	5430.39	7985.37	17928.5	661230	3.83871e+06	143.194	440.558	2430.15	213440	1032.11	3350	123080	1.22728e+06	265495	85.0412	510.255	2460	13181	168258	190.469	266.153	276.4	444.993	438	6007.86	1539.39	1527.1	10753.3	45219.5	21673	10215.4	6977.32	735.224	524.932	130.208	267.682	409.437	12156.1	409.912	845.053	881	1109	1107
356 #02-048 2-2-12	1949.37	41		241.065	314	4.37307		122.079	127.281	1185.12	3743.76	59.1546	300.432	296.034	557.997	125.478	27		711.15	98.7472	20.135	64.7891	72	4	149.637	89.8424	61.6145	36.3331	52.5954	18	122.555	191.093							559.272	500.232	69.5753	168.358	422.923	9829.26	342.039	179.877	268	360	283
357 #02-049 2-2-3	2149.81	5667	3656.49	140546	44828	1671.97	4876.79	6836.63	18384.9	599721	5.0192e+06	157.841	496.226	2860.16	244513	744.394	3299	106579	1.02839e+06	178841	75.4311	337.146	2486	17389	215067	183.388	357.96	278.151	451.67	298	5710.92	1644.63	1416.93	11577.7	35305.3	18439.8	9908.17	5855.81	742.823	749.492	141.843	278.779	464.822	11609.2	378.926	794.746	764	1018	1073
358 tQC	2100.43	7745	5073.76	107504	94842	3902.83	5654.5	10797.2	9763.49	795789	4.23523e+06	246.314	418.866	2352.23	267796	401.916	2738	139545	1.41786e+06	273058	105.686	291.677	3637	26323	238581	177.318	119.891	184.368	348.064	679	4099.12	2120.19	1396.81	13645.7	38593.8	17280.8	11832.2	8385.97	1075.21	836.374	238.681	383.042	474.17	13043.2	493.225	1473.18	1630	1775	1531
359 #02-050 PQC	2271.38	9198	6143.72	166613	94983	3564.97	5387.2	10933.9	13959.7	921369	3.98784e+06	204.309	452.837	2263.12	260159	529.113	2367	148458	1.42803e+06	250687	113.121	187.202	3122	22804	273011	100.247	198.605	185.384	334.396	634	4745.03	1739.6	1595.61	12728.3	44056.7	15457.2	13236.3	7975.12	1041.51	880.58	240.511	303.892	442.243	12069.5	433.424	1359.53	1469	1783	1557
360 #02-051 2-2-6	2096.47	7617	2870.93	127124	46088	2342.73	5246.84	5901.14	16686	724118	4.95713e+06	131.66	413.453	2636.55	233784	757.197	2201	98692.8	1.07908e+06	257268	136.695	264.497	2510	15847	204898	235.632	263.72	235.461	577.508	347	5443.18	1368.26	1641.39	12931	39808.5	17982.1	10231.7	6904.29	1043.88	629.322	147.047	264.064	498.816	12434.9	554.057	1737.58	1059	984	2260
361 #02-052 2-4-12	2097.45	12314	8048.84	267935	111695	4226.54	10769.5	20140.8	27446.5	848885	5.24809e+06	139.983	475.337	2897.76	339892	990.217	3555	168901	1.77968e+06	443848	129.002	705.166	4259	24188	284674	245.038	434.954	339.935	697.93	1084	6788.03	1897.75	1841.76	11858.2	43436.2	19755.3	13884.2	9305.86	951.641	538.597	148.536	309.074	435.01	11580.1	629.431	895.757	920	974	1321
362 #02-053 2-4-3	2091.13	10035	5963.57	169117	61218	2363.98	8281.63	9434.26	23800.4	723450	5.1691e+06	132.577	485.992	3028.4	248457	1289.32	2857	126728	1.45716e+06	400867	199.877	638.055	3683	19858	280287	199.33	445.816	359.441	1105.48	722	5139.42	1142.33	1262.09	9780.19	37391.8	15543.5	12694.3	9702.57	714.765	579.187	122.139	166.911	341.037	10271.3	422.26	535.792	304	444	721
363 #02-054 2-4-6	2024.09	11357	7927.72	244181	71208	3409.17	11407.8	13993.6	27029.1	958126	4.82457e+06	121.401	447.273	2295.63	356901	1563.63	3445	138309	1.46035e+06	822214	195.84	1102.59	2914	23246	455101	253.809	403.344	284.574	510.401	691	6722.34	1594.92	1800.29	11989.2	41922.4	20948.1	14334.3	8134.38	742.421	690.832	53.6414	204.309	442.792	10819.6	466.963	674.901	625	832	927
364 #02-055 2-4-1	2053.79	8956	7832.14	198187	77631	4096.18	10037.2	13311.3	23182	733950	4.51396e+06	129.723	482.403	3425.77	276210	887.804	3365	125550	1.3822e+06	347980	158.579	327.488	3603	16786	235226	161.696	353.517	305.659	984.162	825	6488.63	1527.38	1363.77	10365.2	43345.3	13998.6	15724.3	10063	936.228	687.69	183.239	304.508	454.54	11329.1	498.056	1410.34	780	1105	2144
365 #02-056 2-5-6	2069.58	6063	5124.97	229291	58585	2526.78	6732.76	8404.01	28753.8	837052	5.02476e+06	171.195	469.031	2409.45	259718	942.084	4671	109760	1.6107e+06	347061	174.343	432.057	4234	20602	267033	182.718	370.854	347.737	666.938	580	7013.25	1932.6	1743.63	15228.2	47726.4	22549	10583.3	7198.05	738.175	594.359	131.592	299.942	443.518	10395.6	417.963	665.393	927	894	1001
366 #02-057 2-5-1	1997.44	8814	4152.2	141010	59297	2251.65	5056.76	7670.16	11640.8	577616	3.34045e+06	139.763	447.091	2558.39	228093	441.19	2642	94935.3	850239	414468	83.1469	193.973	2027	12936	254758	136.591	166.452	234.95	363.207	524	4516.09	1091.69	1080.62	8817.18	37724.4	15166.7	9042.98	5682.25	893.959	820.866	173.23	273.353	445.194	9989.05	357.868	1260.81	974	1152	1764
367 #02-058 2-5-12	2114.91	6235	3924.9	155795	52154	2278.58	4329.25	7497.9	17899.9	847897	4.58928e+06	185.153	470.645	2222.78	314204	818.702	3213	112502	1.35298e+06	325989	150.098	375.27	2621	18351	275544	208.711	292.184	224.697	368.909	418	5788.62	1552.52	1750.57	16751.2	56962.1	22319	10034.9	7263.74	667.167	808.941	93.147	226.197	369.825	10464.8	323.653	775.749	768	806	682
368 #02-059 2-5-3	2075.72	9343	7489.07	229223	72288	3233.03	7273.74	11470.4	21459.6	814292	4.22422e+06	164.119	454.354	2875.12	345315	801.803	3418	119446	1.50195e+06	371249	124.599	306.791	3084	21649	271774	172.676	323.855	245.168	448.235	471	6836.17	1854.18	1799.53	14267.6	47242.4	20134.4	12156.6	7741.87	792.641	711.664	126.203	198.925	438.413	10625.7	382.369	885.622	715	935	1114
369 #02-060 2-6-3	2007.23	5260	5236.78	182660	43218	1858.78	6510.63	9760.41	17999.1	765196	4.32342e+06	95.3013	430.256	1940.96	206027	987.655	2706	96419.2	1.34143e+06	213811	92.3494	321.753	3265	19101	235230	142.508	367.216	271.404	327.741	228	6238.94	2008.94	1781.76	11941.1	33718.6	19959.2	11215.6	7121.71	824.904	368.461	124.113	128.304	402.232	9743.69	419.046	548.26	412	750	741
370 #02-061 2-6-1	2024.12	7980	5735.81	110175	51439	2050.4	5332.95	8893.87	10436.4	534911	3.80017e+06	124.864	426.597	2080.41	206328	360.634	2904	120236	1.09159e+06	172572	56.4568	229.021	2299	16846	194122	147.976	176.668	199.399	184.961	308	6046.02	1987.49	1541.52	10435.1	35653.5	18626.2	11338	7234.55	948.179	776.287	185.116	290.238	456.894	11916.1	423.724	1214.77	995	1371	1922
371 #02-062 2-6-6	2130.18	7443	6941.95	184775	61886	2733.48	8520.45	11493	16405.2	839077	4.64755e+06	83.276	385.851	1844.72	205153	926.267	3139	83137.7	1.36276e+06	362875	98.4173	325.696	3719	18788	279687	151.872	219.4	232.083	403.585	449	7302.88	2579.15	2062.54	13129.9	36009	23712.7	9640.78	8181.76	536.683	545.535	76.6536	121.195	300.037	9584.8	505.435	441.212	590	727	599
372 #02-063 2-6-12	1975.64	6457	3510.64	139371	37399	2127.1	4156.35	6303.36	10338.9	627770	4.17114e+06	76.5506	355.808	1903.74	170743	767.049	1268	70148.6	1.13681e+06	258677	150.376	479.266	2743	16906	217152	165.082	254.975	336.504	479.096	288	5057.06	1521.67	1182.62	10302.3	36792.7	14129.3	9253.63	5937.21	836.281	759.088	113.135	270.087	387.01	11802.4	443.507	1061.63	906	873	1056
373 #02-064 2-8-12	1952.67	4580	3962.56	137200	38785	1803.96	4691.65	7068.25	16487.7	643852	3.80163e+06	114.349	405.852	2454.21	269922	832.134	2942	91304.3	1.09585e+06	140922	139.296	316.413	2260	14639	178592	163.018	140.477	224.392	565.478	293	4772.11	1275.09	1493.99	12489.9	36936.6	16306.2	10943.7	7779.73	715.78	725.186	182.614	280.107	387.988	10145.7	367.049	1063.11	792	1102	1000
374 tQC	2094.91	9383	4326.28	136421	72101	2948.77	6768.57	10601.1	11347.9	755929	3.74885e+06	200.484	364.896	2182.49	237623	488.681	2853	143033	1.48298e+06	246557	49.7264	192.498	3190	21916	217406	207.394	174.125	134.424	472.109	436	4386.23	1629.05	1471.73	10869	39186.8	14436	11820.2	7112.45	1193.55	767.099	167.027	214.385	430.296	13250.3	365.019	1465.87	1810	1887	2203
375 #02-065 PQC	2077.15	8478	5084.89	137560	85862	3037.28	5484.73	10928.8	11629.6	631520	3.89002e+06	263.645	409.431	2249.08	266492	457.238	2520	150938	1.41497e+06	256197	126.622	206.463	2382	22386	242165	134.628	226.404	159.205	683.906	458	4882.43	1786.88	1574.71	11775.2	41720.8	15462.1	12241.3	8262.31	895.23	860.744	203.711	272.766	331.076	11945	376.55	1306.45	1377	1711	1843
376 #02-066 Blank + ISTD	1966.52	53		273.83	152	1.0173		74.8359	221.878	814.344	3571.73	46.4633	284.829	293.054	581.436	51.3631	30		604.249	100.744	29.9825	44.3718	33	23		63.4258	32.7614	36.1252	27.7423	0									567.929	541.181	90.0444	154.922	337.522	8735.15	373.697	109.518	212	351	372
377 #02-067 2-8-6	2052.5	4764	3171.88	135681	44807	2426.9	4391.11	7506.01	12285.7	616958	3.76682e+06	165.953	403.832	2186.72	197221	754.959	2357	90312.2	817165	315106	143.268	225.725	2632	15669	238019	166.977	252.75	130.602	380.963	380	4300.85	1139.51	1342.06	10462.1	32018.1	13687.1	12952.7	6566.69	705.188	739.786	77.9531	210.161	368.108	10475.2	407.068	775.153	787	1178	1030
378 #02-068 2-8-3	2111.21	5800	2808.66	95967.2	51999	1881.21	3017.77	6978.98	14056	586475	3.68455e+06	110.863	371.929	2177.61	221555	630.455	1734	92398.2	706657	170511	141.519	277.605	2377	12220	184452	130.041	186.866	146.061	370.98	299	3988.31	928.169	1214.96	9811.32	30686.3	14896	9028.62	6975.87	812.293	710.179	179.777	188.896	428.668	10739	391.659	1301.15	924	1082	1628
379 #02-069 2-8-1	2064.14	3280	2619.45	135957	45069	1684.97	4129.98	7654.05	15752.2	670665	4.10755e+06	190.967	418.591	2278.48	214680	766.253	2214	92600.2	830804	122226	115.111	261.211	1704	11883	163293	126.104	174.428	230.504	459.486	404	4175.34	1059.47	1218.94	10347.8	32401.8	14594.9	10070.3	7449.2	566.101	531.24	30.9206	137.192	336.945	9411.47	330.919	607.279	526	572	679
380 #02-070 3-1-1	1991.77	8739	4046.43	113434	59543	2858.84	3889.63	9404.37	13139.9	636148	3.30024e+06	274.337	387.094	3236.23	157300	845.522	2833	85695.7	924182	182407	87.0232	320.689	2552	13880	220520	239.581	294.401	225.294	457.423	495	5048.52	2082.92	2206.97	12692.5	35098.7	18353.7	9993.82	7060.26	1459.01	1169.83	168.032	288.918	572.762	14259.1	490.161	1756.39	1701	1895	2272
381 #02-071 3-1-12	1984.96	5046	2435.26	85638.5	61970	1802.47	3523.09	6865.07	12154.1	536739	3.72692e+06	179.299	388.415	2214.05	190737	679.322	2017	75630.9	938770	170266	92.2938	295.586	2606	15901	161250	155.8	219.964	286.987	414.431	184	4849.22	1703.28	1821.96	9935.63	30367.6	16019.9	10324.7	7041.66	818.173	532.175	135.39	147.993	420.087	10081.8	421.684	750.679	849	1079	522
382 #02-072 3-1-3	2113.65	7278	4657.69	122547	51647	2208.74	5657.13	8958.51	14223.5	557856	3.05648e+06	149.565	358.756	2243.31	159968	509.779	3046	89027.5	882688	145225	125.047	241.127	2906	13968	181812	187.34	250.853	189.646	572.989	241	4486.89	1761.09	1821.41	10928.8	29550.4	16838.7	9224.68	7135.25	1816.54	1435.8	232.037	357.964	559.93	13393.8	668.618	2209.13	1127	1507	2790
383 #02-073 3-1-6	1963.01	4570	2558.65	117036	52198	1715.34	3206.72	8032.81	11099	471498	2.81745e+06	165.637	370.479	1690.41	167406	578.348	1973	104900	963020	164092	127.307	345.021	1740	11850	156616	195.685	349.428	294.943	391.917	245	4514.35	1469.06	1225.39	9138.22	29404.4	15387.6	9938.93	7170.24	1025.04	738.544	225.3	410.927	404.179	11726.2	408.713	910.54	1200	1921	1396
384 #02-074 3-11-60	2142.86	4072	2343.36	177129	81494	1511.79	2259.11	6228.76	11406.9	823765	3.10935e+06	176.875	325.436	1160.88	133053	610.365	3355	134878	1.08901e+06	73644.9	97.0803	189.572	3672	21070	181182	140.959	180.8	328.036	374.211	507	5768.12	2571.91	2027.06	13141.2	53756.1	26723.8	9529.09	5497.24	519.985	568.998	52.9586	176.373	347.863	9594.34	375.636	280.167	479	666	563
385 #02-075 3-11-3	1959.3	2886	1798.93	120579	55427	1363.45	3763.52	3812.64	10592.2	480853	2.41648e+06	139.035	323.787	1876.5	95787.2	861.463	2036	86907.2	850989	138454	162.111	325.431	2436	16412	162685	170.705	252.437	343.365	367.003	352	3248.05	1162.87	655.786	5503.28	18936.1	11679.5	8086.04	4471.69	538.415	510.223	74.1456	166.485	412.783	10016.7	377.505	347.703	736	840	646
386 #02-076 3-11-12	2094.34	6453	2142.02	95875	76340	1972.08	2940.78	7848.37	9935.13	511187	3.26245e+06	118.72	387.027	3192.58	189430	553.075	2213	107635	958220	136124	126.026	207.077	2482	16462	139484	197.674	223.58	180.083	328.887	542	4628.85	1239.69	1241.52	9994.54	35557.5	16544.7	9344.62	7337.84	1016.56	717.198	276.205	326.689	515.507	11735.4	513.927	1529.84	1588	2150	1497
387 #02-077 3-11-6	2047.71	4687	2118.94	109207	51398	1461.22	2441.73	4230.42	7871.5	633103	2.86795e+06	95.9289	331.858	2036.26	127132	470.825	1815	84378.8	907492	91632.6	112.076	292.109	2386	15197	143984	157.171	211.895	212.165	422.42	406	3607.6	1217.91	1100.44	6472.12	23273.7	15978.3	7295.69	4752.86	713.128	524.37	39.9556	135.722	352.949	9687.92	354.873	278.159	705	635	210
388 #02-078 3-11-1	2142.29	5664	1859.31	113109	58615	1703.95	2485.61	4450.82	5578.73	543799	2.49415e+06	74.9153	361.438	1650.44	130631	498.341	2457	164166	710887	109539	146.454	168.237	3498	20284	117555	176.191	148.038	249.891	474.174	768	4267.28	1522.36	1628.13	8693.85	27457.3	18038.2	8280.79	5444.21	796.918	630.279	141.729	212.726	346.351	11060.5	354.465	1120.1	1302	1370	1138
389 #02-079 3-13-12	2052.08	6225	4322.25	161476	52931	2601.02	5736.15	10681.8	11392.6	682892	3.62554e+06	106.093	420.206	2799.6	248143	901.401	3180	140791	994340	431249	96.9716	423.493	3558	19473	186201	135.818	193.223	122.407	559.477	505	3389.28	968.465	1005.27	9220.84	33319.7	14348.9	9238.75	6204.82	727.455	470.459	114.523	234.728	348.41	8948.74	332.248	397.207	383	623	451
390 #02-080 3-13-6	2051.47	4856	3538.74	149220	44492	2224.92	6370.65	8970.74	13557.2	630899	4.43516e+06	53.8916	381.504	2417.16	209001	711.448	2770	132185	948969	151794	77.2211	250.404	3448	15312	150946	136.615	115.438	145.195	400.596	388	3304.86	1119.18	1365.88	10069	33002.7	14944.3	10708.5	4885.13	468.113	490.814	90.3005	142.192	316.118	10112.5	470.926	259.148	408	408	476
391 tQC	2093.63	10050	5327.08	108165	105293	4216.4	7023.11	9790.14	12733.4	669184	4.66799e+06	112.805	625.438	2687.48	291545	650.97	3043	148594	1.70236e+06	293695	121.501	195.596	4215	30247	260427	176.831	247.408	175.064	316.568	514	5635.62	1824.82	1871.89	14623.5	60425.7	21026.7	11388.7	8204.46	752.029	805.392	234.3	187.848	423.447	11525.3	374.419	1289.45	1559	1784	1985
392 #02-081 PQC	2069.39	8934	4663.9	123846	75277	3330.36	6108.63	8918.42	11860.1	622527	4.1148e+06	181.127	412.673	2230.45	254874	495.736	2247	136023	1.40968e+06	255805	59.3916	266.959	2848	24013	248874	186.858	144.171	129.201	398.943	276	4611.46	1590.42	1379.43	11558.7	41632.2	14645.7	10394.6	6947.11	998.988	886.993	199.892	273.799	370.233	11454.3	473.512	1439.16	1497	1960	1333
393 #02-082 3-13-1	2121.67	5424	3990.55	195383	54384	2069.22	5166.12	8087.6	20805.1	663035	4.74353e+06	193.902	467.192	2020.55	190321	757.022	4633	165942	1.29451e+06	180214	155.568	245.343	4459	20553	253715	176.237	276.622	348.805	441.224	458	4581.31	1422.07	1428.29	11543.6	41026.4	17238.8	9982.11	6753.54	585.583	529.963	36.5377	79.8482	363.077	10132.3	368.554	369.912	489	693	789
394 #02-083 3-13-3	2105.41	8017	4561.43	182428	66236	3085.08	6962.47	12204.3	26861.4	1.0517e+06	5.32625e+06	135.904	522.192	2670.49	288776	805.881	4552	213593	1.58276e+06	225162	242.917	659.495	5319	30196	234551	365.807	348.377	303.767	733.667	365	6325.77	1806.83	1529.47	11658.9	39135.5	18870	10753.5	6784.67	680.886	522.491	134.964	175.217	377.193	10220.2	390.112	796.044	627	950	1045
395 #02-084 3-14-12	2050.86	5344	4307.92	228132	71056	2464.4	5669.18	9560.49	23525.6	978603	5.17935e+06	94.1806	545.239	3074.54	171196	964.695	4033	114659	1.80998e+06	231854	127.637	426.828	5846	24003	460593	171.598	479.156	548.624	1090.78	458	7612.03	2381.27	2132.42	15471.7	51627	23338.3	13152.1	7483.94	751.852	690.518	134.517	212.692	372.881	11207.8	477.149	483.328	717	914	784
396 #02-085 3-14-1	2028.97	6774	5173.64	208772	56382	3571.3	6462.13	12008	28033.4	1.02455e+06	5.91946e+06	253.302	640.341	4419.28	455048	1186.99	5247	170272	1.50455e+06	356257	242.564	270.512	4151	29359	316863	212.278	287.398	349.189	795.512	954	9423.41	2026.53	1717.01	20458.8	74340.7	21895.3	10761.6	8189.62	794.761	670.229	97.7887	237.931	393.085	11269	351.792	612.986	534	968	662
397 #02-086 3-14-6	1973.59	5452	4405.47	205423	63796	3068.45	8400.52	14423.8	25438.4	1.15725e+06	6.61987e+06	100.343	582.117	3275.54	346119	982.912	3816	111451	1.67187e+06	308069	161.543	417.333	4075	30274	475444	213.166	266.371	399.27	658.044	461	9109.69	1924.99	1461.43	13905.8	50643.1	20998.9	10726.9	6830.99	588.754	582.289	97.3237	177.951	392.533	10421.5	381.469	491.257	734	1007	544
398 #02-087 3-14-3	2061.9	5588	4492.54	214870	64016	2828.66	7704.99	9625.89	31086.4	892100	5.46384e+06	161.468	502.006	3461.59	268788	946.476	4689	129176	1.95448e+06	304755	160.591	294.114	4187	25851	385882	180.421	352.468	312.75	873.748	473	7452.13	1767.37	1360.42	11542.3	42331.9	16324.6	10704.3	6796.21	518.898	400.652	72.8514	114.675	354.568	10229.6	416.732	508.111	475	643	458
399 #02-088 3-16-12	2033.47	4499	3450.56	184684	53046	1833.82	7563.01	8755.45	25360.1	734858	5.25805e+06	155.863	538.551	3467.96	295022	802.81	3481	142733	1.31845e+06	149846	138.13	324.463	2543	17149	220938	201.208	304.222	374.63	413.323	471	8241.94	2471.82	2508	16712.8	70156.6	29152.5	9767.14	6268.49	668.425	646.191	89.6395	120.69	347.099	10547.8	381.149	452.426	727	855	809
400 #02-089 3-16-1	2086.91	5046	4191.79	199419	52571	3025.01	6388.57	7974.2	25519.1	773292	6.58813e+06	213.679	628.094	3889.26	221012	997.057	3381	90592.4	1.30096e+06	225692	328.414	521.954	2717	24263	264532	269.855	318.518	248.078	786.074	446	7465.83	1902.48	2104.66	19056.7	60485.4	22368.5	9140.4	5989.88	873.989	641.756	114.834	251.195	411.587	11677.5	372.226	391.874	769	872	556
401 #02-090 3-16-6	1949.36	4201	2607.34	253395	45663	2468.69	6335.62	7778.29	27797.1	1.05174e+06	5.89139e+06	169.091	590.874	3357.46	389443	1453.89	4242	104145	1.51436e+06	206450	193.736	289.43	4529	23142	245601	312.619	334.095	392.46	678.162	448	7801.76	1913.58	2453.51	15857.9	65342.4	20922.7	8479.28	6227.47	764.621	623.818	111.183	164.344	325.714	10811.3	439.684	370.002	538	655	603
402 #02-091 3-16-3	2042.21	3080	3659.62	168429	43731	1801.86	3759.52	7332.61	16010.6	756407	4.48354e+06	163.574	515.278	2798.32	206905	748.935	3524	85319.6	1.19333e+06	142178	106.571	382.512	3065	16188	201366	243.147	316.88	225.573	556.6	314	4644.1	1439.63	1570.17	11028.2	43767	15212.1	8721.24	5973.85	672.039	556.945	76.6047	223.269	392.061	11267.4	422.812	423.044	459	973	821
403 #02-092 3-16-60	2112.35	6259	5656.65	211444	58275	2708.13	6063.6	8284.29	18950.8	876707	4.48561e+06	148.837	438.188	3062.26	283018	585.902	3747	129467	1.35373e+06	168183	136.6	274.887	4276	20531	244081	339.356	393.553	330.533	555.188	413	7929.18	2206	2508.99	19464.1	68081.3	29344.3	9540.46	6991.34	802.365	744.353	127.885	128.934	441.887	12413.4	352.725	653.138	813	1104	1278
404 #02-093 Blank + ISTD	1967.57	66		1482.83	310	1.39532		105.138		1095.65	6029.58	44.9744	240.218	242.916	526.719	65.0786	45		1079.37	143.934	19.6507	84.027	5	35		68.3762	35.895	30.0927	27.7641	7						57.3018			641.998	413.06	150.267	196.568	358.977	8918.89	390.895	183.097	136	260	237
405 #02-094 3-17-6	2035.64	2544	4385.2	182530	54030	2801.58	5855.8	8162.94	22153.7	1.08439e+06	6.81554e+06	195.262	676.887	5556.57	446166	1239.67	5742	150424	1.74739e+06	208639	239.358	695.008	5755	23260	338779	296.636	480.817	319.935	987.073	405	13238.8	4124.65	3656.18	29656.3	87417.4	41912.6	11340.9	7226.86	879.635	727.936	85.7441	215.78	403.746	11821.7	448.094	844.184	862	1191	990
406 #02-095 3-17-1	2045.96	4705	3026.58	178328	52909	1458.19	4715.15	6868.63	18841.2	851394	4.70351e+06	105.361	484.142	2348.64	203496	883.319	3520	104719	972484	112842	120.129	300.93	2643	13231	131406	210.619	218.935	357.859	417.987	260	6646.89	1737.88	1672.81	13658.9	37309.8	22799.3	8615.19	6244.17	752.868	625.875	85.8416	179.451	457.539	10574.7	360.571	549.248	643	894	685
407 tQC	1990.85	7998	4946.13	129564	91509	3586.24	6289.69	11631.7	13560.8	691211	5.36579e+06	223.782	519.776	2583.66	323787	425.447	2875	148014	1.82424e+06	275954	94.5614	212.078	3462	27754	246007	185.04	284.075	175.287	494.21	591	4636.35	1839.72	1792.05	14665.6	52082.9	19266.5	10047.1	7497.61	1068.17	735.537	129.27	304.211	352.788	12344.3	503.179	1361.91	1516	1459	1776
408 #02-096 PQC	2153.58	8091	5263.93	142592	89672	3568.33	6388.96	13854.7	13969.8	683297	4.70161e+06	183.497	534.467	2392.23	279652	451.889	2500	145799	1.68712e+06	261876	95.1846	173.218	4055	25693	249651	145.309	258.125	237.98	444.827	439	4501.59	1767.36	1646.42	13511.4	45995	17308.6	13146	7321.05	941.834	874.287	222.795	271.034	503.616	12474.2	510.688	1312.48	1372	1674	1618
409 #02-097 Blank + ISTD	1965.51	31	11.4448	1203.81	367			61.8835	162.507	772.117	4416.83	39.6751	251.523	247.811	569.609	69.3616	11		781.292	131.288	21.6709	78.9363	0	72		93.1293	45.1044	28.4906	27.5509	31									604.97	556.896	30.7746	47.1083	397.326	8099.09	317.79	137.909	189	350	291
410 #02-098 3-17-3	2051.75	5312	4206.67	186390	68157	2439.03	7591.84	12129.5	22969.4	891140	4.90555e+06	184.451	432.428	3519.65	332334	889.989	3960	162050	1.54596e+06	151323	154.658	441.367	4673	18956	214482	268.493	345.74	351.012	546.593	408	9360.8	2199.66	2402.33	22375.1	64893.6	31478.5	11719.7	8164.99	654.283	628.623	69.4397	115.99	381.804	11843.3	580.478	733.282	865	948	857
411 #02-099 3-17-12	2231.81	5482	4555.46	195904	66467	2870.66	6722.14	10392.5	32408.5	949181	5.56558e+06	170.147	450.677	3090.32	353514	974.611	3990	191050	1.37423e+06	151728	253.805	335.575	4374	22818	200863	243.866	315.875	399.811	886.193	429	10854.1	3089.78	3307.73	32687.2	73646.2	32407.3	12536.1	8415.88	820.658	704.953	75.8605	159.352	435.378	11966.3	507.976	701.739	1051	1178	1198
412 #02-100 3-18-3	2127.99	5942	4296.88	139986	49108	2356	4743.61	8379.36	15749.2	696973	3.92333e+06	98.8349	477.021	1986.94	193435	912.629	3867	129846	828966	105833	108.866	336.852	2999	13585	202688	190.85	354.301	213.385	747.55	188	5681.77	2161.46	2051.16	15819.4	59660	22945.7	10772.8	6659.03	570.754	572.141	113.26	189.366	347.159	12391.6	396.268	382.915	872	1060	926
413 #02-101 3-18-6	2185.84	3310	1922.27	145558	49919	2183.52	4019.18	6879.33	18105.9	749278	4.77941e+06	114.182	493.011	2479.53	183425	742.543	3283	141513	853498	110675	99.0406	327.112	3309	14529	189005	212.638	308.583	302.143	781.832	332	5964.54	1918.26	1904.32	14263.8	46794.9	22754.9	10903.2	7533.58	664.177	625.238	152.022	224.334	400.101	10852.1	453.995	844.886	890	1138	1190
414 #02-102 3-18-12	1989.31	4819	2840.99	144226	75059	2940.11	4246.24	8888.5	14776.1	762287	4.70395e+06	130.898	452.583	1693.19	183930	1029.47	4069	170231	1.02116e+06	295307	104.894	723.555	4053	22934	274978	288.552	537.194	386.176	965.547	326	6308.6	1770.18	1586.21	11104.5	40671.3	23450.7	9096.72	5172.99	765.836	634.815	135.262	228.141	291.901	11192.3	407.16	754.422	966	1157	1076
415 #02-103 3-18-1	2011.42	6281	2980.97	162807	72913	2053.35	4681.41	6896.83	16604.7	847617	4.61256e+06	80.4558	499.348	2158.18	165016	819.353	4712	180558	1.03639e+06	127553	119.338	322.578	3607	19625	300639	134.201	309.985	308.593	958.08	340	5535.75	2153.2	1929.89	12149.7	45989.6	23949.9	9299.56	5880.44	982.77	782.228	163.092	261.039	400.828	12253.3	451.471	1286.03	990	1254	1483
416 #02-104 3-19-1	2039.51	5809	4978.21	275869	43059	2520.82	6753.9	8091.07	27152.8	982382	4.06923e+06	199.277	492.922	1996.77	211524	1618.92	3545	86379.4	1.46853e+06	580124	216.109	868.443	2598	15185	361448	197.305	381.428	189.533	877.046	527	6146.61	1810.77	2095.29	12968.9	33439.9	24219.4	8624.7	6576.86	779.004	677.464	169.958	325.137	414.515	10123.3	429.233	431.698	657	919	671
417 #02-105 3-19-3	2105.2	4481	3046.97	194449	34229	1818.08	4078.96	5329.05	13386.2	608040	4.37336e+06	113.436	452.27	1754.85	210154	777.402	2538	69953.4	1.07646e+06	384923	115.143	668.185	2249	14612	303462	138.375	328.577	163.739	447.657	346	5764.98	1874.09	1781.86	12562.6	38732.9	20120.1	8364.58	6223.3	699.854	688.42	77.5159	357.148	461.195	10253.1	351.444	336.008	527	961	449
418 #02-106 Blank + ISTD	1894.04	35		1287.19	178			71.2381	164.38	1099.53	5244.76	36.5422	337.935	240.813	606.417	50.7276	3		902.399	161.165	30.8694	43.9455	64	7	160.993	67.5927	42.5647	28.4811	69.9495	7				108.517	178.789				641.501	457.958	155.794	141.596	354.479	9281.53	406.186	159.136	237	481	81
419 #02-107 3-19-12	2029.01	5369	2662.95	188066	30659	1663.35	4684.68	5485.68	20027	718814	4.55526e+06	107.309	511.841	2114.61	226774	862.078	2900	84170.6	1.02932e+06	231877	153.793	356.23	2431	14144	254912	191.242	272.653	325.132	414.342	453	6865.66	1382.52	1816.98	11780.8	38851.7	14514.1	8193.27	5141.22	864.082	567.801	141.717	252.732	395.524	10582.4	508.692	640.556	591	879	831
420 #02-108 3-19-60	2128.08	2634	3072.42	174232	31856	937.745	4071.75	6972.24	20728.3	813097	4.93445e+06	178.959	425.392	2129.27	171786	723.732	2213	82465.4	1.31181e+06	218732	137.688	376.188	2772	15590	312302	142.268	326.601	191.159	461.09	373	6705.63	2513.12	2702.97	15028.9	38327.8	17005.4	8507.01	5721.48	524.449	302.994	71.9792	86.4535	346.415	9885.39	409.586	184.732	330	399	460
421 #02-109 3-2-3	1969.73	3875	2652.77	107000	40990	1783.2	3351.02	5421.46	9975.95	456902	3.11739e+06	138.076	369.706	2407.45	110329	630.207	1982	81321.9	728783	210337	56.2235	299.479	1744	12592	252634	162.196	154.499	212.415	405.839	168	4021.68	1362.79	1471.26	7723.67	20363.3	13301.1	7559.81	5862.88	665.03	528.303	62.6048	180.565	302.772	10299.3	468.076	724.058	791	886	832
422 #02-110 3-2-12	1971.82	7034	2016.85	131472	66092	1541.47	2795.57	6770.85	12376.7	488279	2.75552e+06	223.846	279.455	1560.31	156352	620.969	2031	109359	601160	176271	84.7528	252.41	1962	11155	184516	86.0543	152.901	164.906	338.207	455	4356.35	1171.46	1368.57	9387.92	30830.6	14201	6664.99	5503.77	1046.06	976.554	277.089	425.698	412.635	10943.5	376.467	1842.8	883	1233	1827
423 #02-111 3-2-6	2038.34	5194	2988.6	96855	50819	1770.4	3231.92	5435.15	10030.7	372104	2.33089e+06	72.5579	383.481	1442.25	136403	361.584	1683	73806.3	624664	155505	88.1247	152.827	1750	11491	163495	118.405	267.499	99.5628	181.003	283	3204.49	1121.12	1184.04	6735.02	21733.9	13511.3	7761.04	4484.61	718.55	542.22	138.931	239.309	540.722	10291.3	386.307	532.199	1019	1031	515
424 tQC	2022.63	8271	5180.28	122632	85687	3719.11	6790.47	10551.9	12721.6	809148	3.89091e+06	171.134	418.675	2346.7	269677	535.538	2473	144325	1.678e+06	250183	88.282	258.401	3026	21364	252495	150.758	143.691	247.699	285.576	488	4551.02	1596.36	1634.29	13695	41740.1	16958.7	10582.3	6499.82	936.243	786.529	148.231	327.722	405.598	11671.5	416.933	1383.91	1149	1908	1688
425 #02-112 PQC	2218.87	8745	5674.92	164611	90200	4017.68	6495.85	11939.8	14748.8	681351	4.34327e+06	135.671	479.676	2306.77	282808	556.622	2539	147410	1.54967e+06	246960	187.316	144.99	3188	26101	248700	188.357	164.137	177.915	417.911	575	5005.49	1735.86	1555.91	12233.8	47156.2	18791.1	12018.6	6614.35	1086.2	762.5	250.223	306.126	508.952	12554.9	367.872	1160.79	1706	1693	1565
426 #02-113 3-2-1	2018.93	6089	3855.61	142063	54548	2783.64	4414.5	6164.9	10927.6	498468	3.17679e+06	92.825	339.264	1975.95	150015	878.618	2589	95350.1	1.03736e+06	340071	57.0441	362.909	2577	15867	250581	161.993	283.392	201.231	340.791	509	4731.95	1305.77	1652.3	9026.05	27155.4	14451	8122.45	6195.2	823.23	856.002	164.627	275.134	396.418	11262.4	327.608	1201.62	927	1397	1456
427 #02-114 3-20-3	2024.99	11157	4074.51	195422	53369	2317.45	5053.99	8750.17	18325.9	737803	3.75323e+06	90.8544	438.417	2752.98	444147	639.287	2962	155240	1.07651e+06	222758	178.969	286.596	3189	18301	145519	204.806	300.69	98.1942	515.54	577	5336.41	1519.64	2064.97	19926.4	56554.8	21198.3	8153.33	5664.94	1567.76	1164.79	128.77	302.603	508.849	12797.1	456.771	1252.13	722	1192	1743
428 #02-115 3-20-1	2144.21	5951	3014.93	150900	51352	1543.38	3242.78	6406.61	18212.1	771925	4.13648e+06	94.5902	437.667	2021.75	252534	750.563	3614	199738	1.10501e+06	193000	145.698	284.275	3050	17931	119306	198.418	251.878	263.018	1009.43	585	4895.54	1482.43	1537.51	12751.7	43951.2	18913.8	9555.36	5788.23	699.127	506.181	87.4353	159.52	387.75	10491.1	440.252	492.783	358	570	609
429 #02-116 3-20-12	2079.38	6541	3139.52	154404	74350	1769.6	3856.14	7988.95	17939.2	598310	3.93713e+06	153.119	434.072	2623.04	336885	524.302	3134	132576	1.07386e+06	195664	143.156	283.525	3059	16529	124744	199.771	241.64	291.167	446.908	473	5806.72	2391.69	2316.08	16910.8	53151.6	21598	9380.39	6137.76	1499.66	1237.75	261.904	365.172	529.767	13745.1	591.99	1660.32	964	1484	1867
430 #02-117 3-20-6	2066.99	11284	4043.18	153858	78906	2677.38	4922.61	11045	26071.2	1.14706e+06	4.17479e+06	155.102	448.406	2228.3	407375	930.718	4255	239244	1.3917e+06	277251	222.361	277.36	3882	30684	164340	229.325	344.426	281.169	447.191	951	5539.68	2970.2	2519.06	22375.8	72618.7	25536.9	10320.4	6782.82	1061.07	893.67	193.415	235.028	524.172	11041	432.085	1028.96	908	1144	842
431 #02-118 3-21-6	2128.96	2857	2152.93	141022	35494	1161.11	2825.21	6587.04	15626	811989	3.73443e+06	170.939	452.958	1762.26	157189	1158.75	2725	82534.9	1.0191e+06	181846	178.741	627.738	3062	11486	183550	121.395	290.278	340.003	710.137	420	3939.08	1122.27	1337.6	12123.3	33227.2	16324.7	8753.13	5832.74	723.414	461.482	120.466	234.806	409.559	10630.5	352.59	443.977	462	598	491
432 #02-119 3-21-3	1962.84	3626	2353.11	117160	31157	1388.33	3341.52	4376.1	12783.9	518971	2.89301e+06	123.464	445.574	1653.4	141724	856.662	2366	66076.7	932857	135686	67.4383	334.247	2421	8090	165572	188.072	187.363	311.486	660.999	252	4427.62	1265.06	1449.42	10277	28002.1	17897.1	8414.75	5268.46	696.052	475.77	53.6632	120.258	453.746	10460.2	387.685	452.903	496	709	458
433 #02-120 3-21-12	2096.09	4707	2833.07	151696	41832	1372.58	4630.12	7589.74	21733	561902	3.32255e+06	135.386	414.953	1926.47	161080	779.586	2752	88082.2	1.043e+06	93875.8	157.468	323.007	3314	13188	162572	169.716	273.224	464.875	551.134	275	4234.71	1239.03	1029.87	10053	31483.8	14717.2	9127.49	6885	628.562	532.626	137.965	202.744	360.03	10645	434.031	646.493	821	911	756
434 #02-121 3-21-1	2197.79	3965	1950.47	144766	45352	1401.62	3787.45	5284.47	16419.7	525768	4.00945e+06	105.459	457.621	2127.73	169881	626.947	3043	95142.5	1.05397e+06	115963	121.177	285.22	2775	16005	210542	190.369	158.721	363.214	666.217	343	6867.4	2141.41	2447.09	17431.6	46879.6	30035.5	7724.98	6625.23	694.543	701.842	174.961	239.153	429.61	11390.7	401.664	809.848	961	1011	934
435 #02-122 3-22-60	2159.59	7352	4455	155275	76934	2183.51	5850.19	10978.2	18739.1	890816	4.99353e+06	122.295	476.308	2863.14	297201	957.928	2865	120128	1.21253e+06	240286	202.131	370.698	1754	20591	194205	218.468	337.847	303.651	784.949	482	8252.95	3012.83	3612.98	24759.6	67773.1	33739	12902.5	7775.42	1142.77	823.754	247.918	385.124	533.657	14434.6	500.215	1515.58	1350	1790	1248
436 #02-123 3-22-6	2063.32	7137	5236.94	271017	53723	3043.27	9969.73	8523.17	40328.8	862808	5.64759e+06	155.85	627.873	2923.19	374803	2100.24	3930	129074	1.62218e+06	308034	368.167	905.554	3892	27210	236064	388.258	467.224	419.591	955.94	620	6464.07	1756.97	1771.46	14799.3	47206.9	22722.4	13100.4	7106.59	870.132	745.595	189.634	245.998	417.332	11186.3	386.862	462.162	594	948	622
437 #02-124 3-22-3	2137.48	7920	4521.15	297627	61550	2932.29	8589.47	8780.71	36591.1	919855	5.04872e+06	97.4515	515.203	2988.38	296261	1282.64	3848	142772	1.76922e+06	255091	298.869	329.098	4265	28971	219478	392.296	454.371	334.835	562.245	608	7738.25	2123.52	2277.35	17331.5	49865.3	26643.1	13821.5	7458.71	895.765	836.94	184.683	210.44	482.576	11713	590.937	1107.85	1114	1247	1161
438 #02-125 3-22-12	2146.53	6540	3566.8	222397	73197	2542.45	5570.75	7080.32	24075.7	862449	5.20805e+06	82.7222	531.106	3276.5	301450	1163.63	3202	123693	1.29175e+06	187284	214.058	362.829	3887	19951	187636	241.221	327.136	396.2	602.809	822	7013.24	1392.74	1761.57	14696.2	42257	23069.1	11522.2	8131.55	930.617	732.867	135.958	329.091	499.216	12078.6	453.944	1259.3	825	1054	1602
439 #02-126 3-22-1	2097.31	8502	4753.62	226661	67499	3353.55	8845.41	8094.1	32315.5	790115	4.43743e+06	180.664	408.634	2643.51	309744	904.97	3201	146812	1.39389e+06	292299	373.972	445.541	4044	24349	228487	282.206	500.992	355.122	595.344	716	8379.29	2338.3	2370.77	17083.7	47127.8	28844.4	14171.6	10483.7	1314.98	1117.1	228.735	334.77	535.289	13663.2	458.731	1737.52	1416	1624	1750
440 tQC	2111.04	9075	5401.33	113041	78642	4065.62	5515.38	9202.24	10122.5	661065	4.67496e+06	178.304	451.105	2470.76	241361	387.055	2288	152081	1.60119e+06	251729	128.133	272.918	2454	25342	240630	181.536	141.255	175.539	600.056	628	4073.56	1711.93	1740.11	12908	45042.9	16801.7	13298.7	8115.97	920.299	775.999	211.584	261.656	426.294	11821.4	568.219	1272.43	1337	1373	1783
441 #02-127 PQC	2048.67	8355	4716.4	147208	85501	3707.91	5863.85	11637.3	14282.4	786712	4.13178e+06	259.922	449.667	2275.61	257273	561.67	3002	122427	1.36368e+06	274593	56.8352	271.085	2726	23087	266115	144.448	160.003	258.855	448.276	436	5022.52	1742.75	1798.43	12515.3	45640.6	16740	11194.6	8332.58	1022.63	743.649	169.147	323.747	429.161	11781.6	430.2	1286.82	1526	1536	1278
442 #02-128 Blank + ISTD	1959.89	71		771.83	254	2.31776	40.2935	154.152	294.018	1608.88	6547.95	39.308	307.849	291.488	716.586	116.33	38	222.988	1591.49	255.789	15.1847	71.188	5		166.145	99.1966	29.8514	35.3767	34.5112	3		95.9809		68.8524	231.633			12.7176	651.008	349.487	118.212	211.145	382.251	9871.53	441.884	219.351	270	541	389
443 #02-129 3-23-12	2104.96	5504	3861.74	185292	55863	1950.03	5925.42	11100.3	16563.4	788134	3.97408e+06	151.591	438.312	2398.8	183758	1012.91	3030	97032.5	978392	202564	103.505	269.236	2956	15133	197908	191.113	213.779	259.135	311.825	321	7106.97	1393.55	1541.29	9150.26	30979	15254.5	8876.77	5990.9	680.767	521.863	93.2466	189.547	377.851	11541.5	398.971	518.858	489	661	505
444 #02-130 3-23-1	2063.11	4291	1997.8	139161	43320	2039.23	2557.98	4520.75	13681.7	541012	4.51798e+06	176.881	476.669	2305.85	154503	617.178	3048	102516	1.07334e+06	294115	166.432	146.968	2082	13086	186888	182.958	195.264	133.384	340.549	415	5332.7	1065.18	1071.22	7528.32	30586	9768.78	9865.7	7666.24	778.537	632.274	168.505	170.912	435.056	12179	286.86	499.674	746	854	602
445 #02-131 3-23-3	2138.12	5236	4545.76	188431	75494	2425.88	7318.64	8147	22163.4	795998	4.11109e+06	119.615	480.213	2077.48	180546	1239.39	3133	124059	1.49218e+06	358506	87.9761	273.08	3837	25077	286582	276.492	365.085	286.273	595.054	480	6124.08	1304.22	1286.24	7996.73	31710.3	14327.4	10997.5	8009.36	822.653	544.403	97.8607	240.694	441.953	10926.5	304.174	286.747	569	657	625
446 #02-132 3-23-6	2004.64	6155	5213.04	221608	64682	2070.44	7275.57	7912.36	21022.6	627019	3.843e+06	165.29	497.116	2206.79	154122	1014.89	2487	101524	1.30082e+06	287091	179.245	192.346	3470	17870	226146	210.003	221.518	279.763	317.239	451	4684.26	964.828	1104.45	6886.14	24066.7	9286.62	8457.22	5855.21	788.762	665.933	112.756	248.809	389.058	11026.7	415.883	310.118	432	917	353
447 #02-133 3-24-12	2137.6	4694	2177.29	115208	60943	2531.24	3079.85	6206.47	12489.7	550665	3.75381e+06	176.27	360.579	2645.82	320718	594.773	2555	104942	981946	159514	217.548	338.564	3468	14794	206479	223.272	311.434	313.747	409.974	378	5566.72	1735.5	1684.55	15063.8	40478	20696.8	9813.97	6139.33	864.057	717.818	103.476	206.548	396.802	11948.2	363.016	922.609	1476	1496	1164
448 #02-134 3-24-6	2064.06	3949	2989.37	172870	77635	2391.58	2992.13	6706.33	12525.7	713883	4.62902e+06	151.114	436.318	2657.26	236974	801.92	2320	122154	1.27906e+06	428559	151.064	521.851	2893	15122	297592	166.503	398.767	270.974	392.094	552	5739.92	1709.89	1745.74	11822.3	34484.7	20167.4	10331.2	7023.19	1046.44	864.333	143.386	342.065	462.163	11773.4	380.703	1065.67	1456	1578	1549
449 #02-135 3-24-3	1988.04	7270	3794.17	162000	93623	2926.92	4503.05	8591.08	14691.5	646766	5.35828e+06	143.541	559.607	3284.65	310404	1077.61	2768	120191	1.26615e+06	276116	163.449	493.186	3369	19123	224269	200.338	429.731	272.855	753.119	573	5161.24	1961.3	1701.42	11746.8	36288.4	17711.5	10635.8	7576.62	1126.71	824.279	260.055	262.418	402.836	11777.9	567.255	1209.84	1548	2031	1353
450 #02-136 3-24-1	1979.07	6180	3225.38	207943	73329	4137.48	5527.62	7872.3	18832.7	759205	4.68288e+06	211.851	526.101	2826.56	245655	2068.75	3474	139064	1.1944e+06	615754	134.942	1873.53	2755	20010	369850	176.634	459.189	179.15	697.785	532	4184.98	1464.84	1035.65	8143.69	27271.2	17798.7	12727.3	7267.46	584.595	660.526	115.467	164.161	470.367	10170.2	467.689	535.296	635	798	843
451 #02-137 3-25-60	2112.39	4145	3023.05	183242	87396	1786.2	4073.5	7851.49	19060.6	732102	4.3331e+06	142.306	464.061	2299.73	275963	881.494	3269	112349	1.2837e+06	132404	106.885	290.826	4445	19887	157719	233.149	369.167	511.096	523.048	247	5074.53	1245.55	1286.87	11599.8	35927.6	15272.9	11211.6	8191.67	623.984	586.117	96.4348	230.703	361.553	10766.7	432.201	481.063	547	597	723
452 #02-138 3-25-1	2170.88	3923	2839.57	151210	47235	1680.57	2872.06	4429.86	13416.1	495594	3.96361e+06	244.619	358.778	1888.53	176930	1147.25	3250	91672.4	1.50208e+06	118999	69.1101	231.627	4005	18333	165077	171.36	285.862	371.115	641.36	293	5154.33	1470.09	1129.68	7956.28	26043.5	15087.9	10080.7	7497.8	713.472	576.658	130.21	167.618	350.785	11167.1	444.747	450.78	583	509	523
453 #02-139 3-26-6	1976.53	5478	3456.68	139701	95781	1823.07	4627.95	7917.46	16776.1	681325	3.7434e+06	218.495	522.477	2132.04	189586	714.655	2270	91947	1.24987e+06	148444	133.832	262.899	2364	15562	211093	200.318	213.213	129.12	463.391	223	3725.63	1163.84	1283.82	11470.1	37489.5	15107.2	10126.7	8110.85	892.522	641.73	146.766	232.254	426.453	11366.9	409.108	979.207	1021	1228	1131
454 #02-140 3-26-3	2036.75	8592	3796.96	113358	63859	2669.78	5940.52	8106.28	15110.6	533602	3.64462e+06	170.215	474.035	2383.66	186909	432.557	2817	116206	1.43835e+06	226218	163.318	259.823	3243	18098	234850	135.94	215.569	208.857	414.374	496	4939.56	1503.7	1438.6	12156	39944.7	16341.8	11924.4	7107.89	1383.08	964.096	348.677	483.939	461.787	13971.8	473.133	2212.93	2100	2428	2278
455 #02-141 3-26-1	2067.28	4798	3216.79	137811	56422	1962.55	4429.99	5361.7	14065.6	621357	3.82281e+06	183.973	381.122	2046.78	167695	564.137	2593	97541.9	972651	150847	140.022	260.336	2507	13582	145638	168.898	229.038	281.182	479.803	270	4456.41	1404.99	1532.33	10223.7	34413.9	18927.6	11295.9	6835.41	674.017	656.312	121.279	258.686	442.228	10859.9	424.796	872.799	989	1382	773
456 #02-142 3-26-12	2026.86	4917	3091.72	143135	56535	2256.35	5101.32	6511.72	13119.6	601626	4.27058e+06	195.388	470.499	2204.27	153348	654.269	2449	124901	1.24655e+06	237419	75.7804	272.242	2495	14744	237890	135.335	243.719	236.659	398.77	390	6066.86	1721.05	1790.5	11948.2	38510.8	17759.7	10496.2	6033.19	938.096	618.447	205.07	250.984	494.369	11700.4	370.045	1061.9	1221	1581	1331
457 tQC	2109.19	7743	4877.4	118567	82814	3823.42	5650.29	10216.1	12301.8	776789	4.28945e+06	257.998	418.036	2454.72	264428	438.961	2584	131884	1.50933e+06	287614	89.8345	271.543	2717	23253	251800	146.211	168.99	232.305	315.827	375	4600.27	1854.76	1543.85	13536.5	39339.6	16148.7	11444.6	7216.23	1048.55	889.305	183.363	253.461	529.043	13126.3	485.259	1461.5	1364	1633	1799
458 #02-143 PQC	2010.39	10474	5368.31	133695	91638	3753.41	5980.1	11764.1	11281.4	662315	4.88388e+06	216.648	472.233	2464.94	289407	626.138	2519	150179	1.53318e+06	264461	131.206	124.724	3096	23481	301138	176.94	199.906	294.622	338.751	521	4420.87	1586.32	1596.23	12678.2	44400.8	16166.4	11646.3	8246.9	1294.8	844.484	179.892	347.679	389.978	12985.3	553.631	1188.08	1540	1862	1704
459 #02-144 3-27-1	2065.14	3824	4256.47	169470	53209	2098.83	4937.5	5879.49	14971.9	610703	3.81313e+06	318.018	396.874	2318.32	194204	903.979	2767	112958	1.4708e+06	251730	108.08	247.314	3645	21296	251556	216.888	234.767	161.779	373.009	302	4927.27	1597.35	1847.61	10101	34349.7	19559.5	12209.6	7729.73	773.174	696.002	148.666	356.277	523.816	11550	492.43	566.23	935	957	556
460 #02-145 3-27-3	2231.33	4650	2869.31	145961	51931	1571.31	3688.85	4476.26	14100.5	569859	3.75418e+06	160.97	532.594	2340.87	177518	432.107	1862	82645.6	1.1717e+06	199483	112.256	223.135	3089	15483	213290	156.961	228.844	233.209	337.809	358	5240.95	1389.4	1356.31	8544.26	25633.9	12317.4	10474.7	6693.88	1007.86	871.775	271.866	457.522	525.836	13371.5	469.51	1727.18	1806	1898	2382
461 #02-146 3-27-12	2105.01	3404	2003.73	123217	35470	1288.71	2324.01	4436.23	11676.7	616347	3.64279e+06	158.465	393.149	1965.85	179501	599.313	2261	78679.6	1.0881e+06	170522	149.153	333.496	2828	13560	142977	112.854	190.337	204.576	312.316	347	4768.67	1215.48	1698.14	9206.23	29913.9	14306.1	9441.48	6382.45	654.519	808.066	174.56	294.774	492.144	10583.2	456.354	623.515	658	1003	851
462 #02-147 3-27-60	2037.16	5258	2651.09	170032	84986	1708.68	3959.1	7372.56	12870.7	697626	4.07506e+06	142.351	443.551	1917.93	164620	559.344	2569	86280.7	1.84843e+06	211443	81.4762	199.819	4138	20536	238663	117.195	239.206	230.77	323.494	444	4081.59	1303.24	1407.89	8423.94	30970.1	12645.9	10463.8	6369.57	601.259	593.326	123.575	148.925	387.972	10018.5	442.044	465.841	881	1029	558
463 #02-148 3-27-6	2143.6	4942	3310.6	151109	53195	1668.87	3355.63	5474.91	14298.7	525882	4.2136e+06	189.476	510.591	1646.17	174759	434.981	2837	91515.3	1.26298e+06	193085	102.192	266.538	3589	18334	230929	134.974	225.231	221.848	507.817	462	5009.12	1559.54	1541.34	9942.38	28469	15177.3	9106.51	6112.03	667.112	469.033	122.761	198.953	470.193	10424.3	457.708	487.505	457	697	569
464 #02-149 3-28-3	2114.98	4988	4035.22	190793	42596	1746.91	4610.97	6329.03	14079.1	562575	4.10577e+06	143.818	495.606	2184.33	179018	983.414	4537	84747	871673	191921	88.0076	134.971	1909	13582	276241	123.976	253.831	204.238	442.126	504	7913.17	3401.41	2636.45	12711.3	35234.1	19969.4	10533.1	8068.89	619.091	490.391	151.708	157.04	478.259	10779.1	418.614	433.586	715	707	574
465 #02-150 3-28-12	2142.58	5799	3985.18	132189	42444	1717.27	3440.54	5866	12056.1	642103	4.50286e+06	218.574	539.303	2385	197333	849.97	2536	82133.1	1.04714e+06	157163	91.007	412.291	2557	15950	217026	189.952	264.614	232.441	522.62	434	5911.93	1648.8	1720.82	9446.92	28569.2	14999.4	10987.3	6720.07	630.208	509.998	78.8761	198.039	535.47	11098.3	413.655	589.282	646	836	613
466 #02-151 3-28-1	2053.61	4434	2728.17	142002	36909	1962.48	4209.22	6397.98	12875.9	615388	4.94731e+06	370.917	425.824	3059.49	159840	1102.89	4088	90943.2	1.04453e+06	182489	165.341	564.484	2413	17390	244516	244.717	219.147	264.311	750.329	572	5498.91	1273.3	1026.56	8236.41	33931.9	13379	11299.5	6921.05	590.348	515.537	87.0195	172.072	331.174	10794.1	353.154	326.763	647	781	614
467 #02-152 3-28-60	2041.53	6906	2928.58	103978	46467	1489.29	3801.09	4650.46	8971.69	627417	4.19793e+06	159.186	471.907	2867.16	225407	487.688	2194	59997.6	919771	195263	85.5231	217.106	1426	13866	186722	146.91	168.091	122.409	350.523	290	5173.76	1784.25	1505.51	10023.4	30342	14302.2	9991.23	6513.41	1249.2	906.287	245.256	396.363	664.918	13773.3	598.388	1593.41	1194	1511	2181
468 #02-153 3-28-6	2195.74	8488	4412.91	219095	48653	2642.59	6134.36	8980.73	17630.9	837300	4.7882e+06	184.193	523.463	2437.19	207387	1004.33	3571	96158.1	1.26738e+06	334581	124.2	526.386	2856	23124	276326	148.261	272.845	212.518	642.177	470	5417.91	1975.49	1789.75	9494.25	31187.8	17349.4	10715.5	7149.08	593.938	671.716	101.693	130.745	437.975	10270.5	362.712	342.649	487	644	481
469 #02-154 3-29-1	2046.45	7863	2641.88	180295	43307	1996.12	3069.29	6188.35	14445	730328	3.4966e+06	157.693	479.304	2143.45	185707	1316.49	2756	81495.9	1.0638e+06	344223	55.2929	643.87	2686	18533	244034	114.9	368.938	289.574	486.618	544	4620.84	1186.56	1067.48	6201.4	19385.9	12724	9824.98	5737.59	718.078	626.414	131.791	181.311	497.945	11245.5	338.005	443.568	493	821	855
470 #02-155 3-29-12	2042.67	7218	2644.5	202604	45214	2069.64	4625.58	5748.84	16476.8	642969	4.31089e+06	197.645	538.349	2444.01	192658	870.548	3139	100880	1.24341e+06	234206	139.364	559.271	2811	15547	236261	144.109	351.95	325.683	424.052	325	5072.86	1230.47	1231.34	8365.83	34840.1	12621.5	10125.7	6630.36	747.561	549.241	91.7309	142.097	436.235	10993	333.176	381.211	592	667	204
471 #02-156 3-29-3	2190.13	16114	4652.22	196446	80521	2814.87	3261.13	8454.76	13840.6	667943	4.21758e+06	170.223	466.82	2446.87	342159	733.606	3277	112032	991233	315748	96.8578	116.435	2941	19610	185224	210.159	210.851	91.4626	514.932	883	5476.95	1622.94	1746.42	10085.3	37479.8	19735.5	10091.5	6210.75	958.58	860.095	176.393	295.376	468.415	12381.6	454.028	1087.45	1226	1444	1400
472 #02-157 3-29-6	2013.98	4136	2527.08	161226	35080	1647.7	3496.07	5576.96	18291.8	588333	4.22529e+06	184.294	442.409	2383.21	195514	861.673	2979	83479	1.05505e+06	248273	107.3	438.635	2441	14730	210447	131.425	210.027	187.472	477.301	310	5069.38	1988.51	1941.88	12527.1	34424.9	19796.9	9314.68	4794.67	638.15	546.348	121.638	221.039	449.329	12272.5	436.517	381.497	590	878	503
473 tQC	1978.53	9129	6018.66	135215	87546	3701.03	5864.05	10192.7	14567.4	598687	4.38023e+06	172.782	428.309	2374.86	257615	538.165	3202	111962	1.44806e+06	252963	82.0213	219.382	3165	22915	243427	163.914	139.241	258.018	440.93	527	4994.77	1810.72	1756.24	12655.3	41675.3	15225.4	12752.2	8687.13	1063.17	809.886	170.194	297.458	464.028	12321.4	388.122	1547.81	1506	1471	1623
474 #02-158 PQC	2099.44	7697	5350.86	116458	82414	3606.48	5673.02	11189.9	11179.1	793448	4.10959e+06	208.008	466.21	2392.46	277697	513.508	2723	123647	1.75605e+06	263892	106.827	248.269	2337	25835	226880	155.165	179.155	338.964	491.617	383	4297.52	1682.5	1745.2	12460.5	44196.9	15913.2	11018.5	7652.14	1079.48	924.302	180.918	290.638	518.52	12622.2	370.418	1407.5	1841	1859	1675
475 #02-159 Blank + ISTD	2010.83	20		628.582	306	2.06766	18.5745	71.8895	298.909	940.685	3286.12	22.4326	313.553	340.057	579.799	98.658	17		766.752	131.565	22.0036	53.0148	17	14		113.019	40.8714	36.0752	35.602	15			24.9112	51.703	172.541				670.544	639.573	161.356	276.421	431.645	9414.7	476.577	141.988	325	722	603
476 #02-160 3-30-12	2109.9	3175	2065.1	149681	36264	1336.38	4016.47	6486.48	17374.2	623974	3.53955e+06	139.157	448.854	1962.05	152297	1055.57	2414	85993.9	1.1827e+06	250849	116.785	624.656	2706	14162	192796	163.361	174.917	189.841	363.059	396	4876.07	1451.74	1549.17	9239.32	26738.3	15115.5	9222.23	6342.5	907.719	675.38	113.421	290.757	396.161	11318.1	391.669	551.113	692	1128	549
477 #02-161 3-30-1	2035.94	3648	3291.68	187666	44820	2185.08	4843.77	8306.32	22571.9	671588	4.46894e+06	145.218	405.405	2027.67	183670	2186.01	2615	96990.8	1.28742e+06	786569	133.229	1752.22	2521	21905	345276	158.711	386.985	348.165	466.456	465	5093.47	1984.21	1534.43	9133.48	29323.1	19088.2	9678.51	6693.94	627.242	515.836	72.9359	182.206	445.44	10832.1	405.197	325.427	449	684	422
478 #02-162 3-30-6	2100.38	4341	2357.82	167083	41100	1419.5	4486.81	6991.29	18273.7	740977	3.63222e+06	79.5792	450.528	1953.6	185369	680.015	2565	82738.8	1.22676e+06	289607	96.7628	237.699	2892	16667	203321	124.518	108.141	328.997	173.017	468	4688.62	1495.29	1465.04	10505.4	31629.9	17060.5	8704.81	6134.39	547.728	548.087	58.4426	133.291	347.786	10267.5	470.63	313.155	304	481	634
479 #02-163 3-30-3	2115.25	4950	2379.6	136110	41824	1255.28	3044.9	6935.11	15205.6	657211	3.35958e+06	115.718	389.866	2283.97	146488	939.436	2573	105178	1.08677e+06	198592	90.3659	322.755	2825	13866	193706	125.313	198.745	131.947	469.437	379	4860.44	1535.99	1965.77	12159.6	32619.8	16159.6	11564.3	5966.77	644.535	521.715	84.4164	137.21	579.266	9284.6	405.224	349.933	454	458	571
480 #02-164 3-30-60	2111.76	10984	4071.76	139643	98714	2914.19	3848.61	9363.88	12591.4	769230	3.56258e+06	117.324	488.864	2440.82	330481	573.558	3241	96279.7	1.18592e+06	186116	111.667	237.412	2677	13332	158304	197.591	222.686	206.253	287.097	659	5329.9	1801.22	2006.24	14350.2	52096.9	23624.2	10312.1	7011.42	998.061	805.788	313.013	377.833	478.855	10954.5	501.424	1135.14	1102	1189	1597
481 #02-165 3-31-3	2011.86	6262	3612.15	224296	43800	2483.81	4830.19	7613.69	18319.3	893335	4.7234e+06	155.222	524.226	2426.18	198811	2694	3509	100953	905219	782726	140.708	1910.5	3052	15836	411847	220.417	613.391	166.7	607.505	443	5417.94	1574.43	1903.35	9366.77	33823.6	25562.9	10701.3	7898.03	772.82	594.742	63.3834	203.06	355.68	11133.6	327.082	449.767	621	692	466
482 #02-166 3-31-12	2143.22	4791	2703.58	235525	53845	1897.33	7364.36	10675.5	26867.4	804680	5.33189e+06	350.553	442.616	2623.51	156038	1149.7	3672	80988.7	1.38485e+06	382910	147.493	432.71	3294	15770	383612	170.567	443.781	216.313	487.589	334	6887.68	2900.17	1990.59	15059.9	43120.9	25901.6	11983	7131.97	613.418	430.532	96.6454	139.815	368.707	11490.2	424.746	337.343	609	690	423
483 #02-167 3-31-60	2252.09	5442	1967.75	87195.2	39555	1733.77	2525.92	3936.17	7404.63	570620	4.92773e+06	227.59	425.909	2917.49	223489	349.571	1790	63710.3	1.10415e+06	93227.7	212.576	327.422	2079	11004	101007	242.158	326.567	70.3233	227.006	179	7543.22	2589.32	2497.59	25628.1	78942	30243.2	13635.3	7887.23	1671.96	1329.48	267.084	394.987	644.08	21535.9	520.522	2691.97	2508	2753	3158
484 #02-168 3-31-6	2146.66	5899	4879.88	196695	41383	2181.3	6328.8	8275.72	16547.5	814857	4.97422e+06	74.6617	569.848	2881.37	201227	1203.86	2889	101038	1.04912e+06	690874	96.3006	539.79	2329	17911	429636	222.527	364.087	218.312	465.268	611	6461.1	2156.18	2195.13	10307.7	35873.5	21764.9	12043.9	6744.48	786.288	590.961	131.234	264.61	371.525	11763.7	393.978	690.046	740	978	831
485 #02-169 3-31-1	2051.15	7676	4771.04	280293	66168	2539.36	6316.57	8410.3	28396.9	972174	5.02948e+06	216.853	429.871	2216.77	236452	1932.91	5313	156211	1.45936e+06	562554	220.522	1106.85	4317	29489	525945	308.512	665.624	241.717	716.572	848	13973.9	4181.89	3095.56	13045.3	32575.2	27335.8	13051.3	8349.3	697.019	751.567	135.185	216.94	370.233	13692.5	330.667	549.335	650	952	529
486 #02-170 3-33-60	2080.02	5349	2728.64	129230	59112	1989.18	3840.56	7744.17	11359.7	745511	4.74851e+06	67.1372	448.715	1758.86	267764	701.965	2871	127459	937494	154625	120.795	340.303	2450	14940	153847	174.853	234.388	299.516	643.165	438	5377.48	1476.83	1384.84	12742.1	38995.3	20082.9	9852.43	6603.25	806.127	625.345	150.805	191.169	494.87	11370.6	433.418	558.008	977	1006	653
487 #02-171 3-33-6	2223.2	4112	1359.6	116107	71679	2102.31	2707.11	5414.25	11995.9	655594	3.18264e+06	221.518	519.101	2107.07	217091	411.395	2303	103195	670761	79468.1	106.43	182.341	2707	10486	105632	144.125	187.483	211.34	487.434	256	7766.76	3045.38	4118.18	18671	34505.2	16742	11160.5	6635.4	717.897	644.249	118.541	205.461	460.766	12042.1	408.764	761.21	1059	1105	924
488 #02-172 3-33-3	2122.41	5324	2520.03	143728	59645	1545.94	3680.25	7033.47	10962.4	638084	3.08517e+06	97.1617	404.736	1783.79	181574	925.328	2649	118557	862940	124498	89.7276	367.551	3061	16392	148287	171.332	202.307	220.168	665.667	422	4403	996.148	981.816	6777.15	21639.9	11259.7	8826.66	5895.84	786.527	601.617	205.027	281.952	411.468	11129.8	430.538	688.061	776	901	1196
489 #02-173 3-33-1	2057.15	4483	2654.49	154510	46021	1823.89	4056.49	7610.48	15456.4	703243	3.73826e+06	145.839	393.422	1905.28	170034	1038.26	3119	125451	1.06532e+06	210257	140.232	480.603	3332	18058	213330	228.705	301.004	306.008	455.578	407	4098.69	1275.22	976.793	6829.23	23731	14522.7	10271.7	5386.19	849.507	617.52	121.241	164.717	409.534	11343.5	343.6	572.108	782	879	856
490 tQC	2110.11	8150	4617.54	105918	73714	3389.21	5786.2	9936.18	12571	732349	4.29327e+06	253.583	403.976	2236.17	229233	612.672	2750	124636	1.46994e+06	225290	186.479	214.445	3094	26167	214155	145.564	155.201	152.222	346.866	426	4508.06	1605.03	1624.7	12380.7	39169.9	16130.3	11166.8	7154.44	1053.62	761.725	199.484	252.248	491.559	12516.3	618.618	1402.65	1717	1947	1817
491 #02-174 PQC	2093.69	9775	4978.01	150705	96204	3515.74	5637.8	9384.78	12786.7	671747	4.80645e+06	180.799	467.706	2484.51	283478	565.438	2747	154343	1.60095e+06	280440	105.722	206.548	3238	26560	283419	213.989	140.888	157.5	435.787	593	5140.42	1859.53	1792.19	13025.2	48689.9	18438.6	11795.8	8202.14	1061.94	846.24	214.276	296.198	509.337	12663.7	518.905	1580.77	1396	2051	1660
492 #02-175 3-33-12	2065.37	5395	2854.13	142606	58745	2095.01	3898.17	6829.24	18064.7	724917	4.30284e+06	237.22	563.959	2393.16	238038	990.799	3075	114353	963325	126333	149.191	218.175	3053	15605	166675	114.961	203.46	223.927	540.505	400	4854.33	1325.81	1094.37	9290.37	33579.4	13922.7	10518.9	6844.18	845.118	715.262	128.327	197.074	517.475	11444.7	406.827	608.445	681	1067	812
493 #02-176 3-34-1	2086.44	5534	4309.65	169587	50656	1820.96	4928.24	8102.08	18377.9	819503	4.5532e+06	121.462	328.302	3095.65	189194	827.213	3233	120023	1.18726e+06	181336	118.226	222.688	4712	21578	156975	155.315	215.305	376.419	381.717	597	5089	1820.98	1999.29	10032.2	37271.4	16098.1	10237	7369.47	670.742	558.24	132.995	221.332	452.702	10182	311.469	479.943	688	824	584
494 #02-177 3-34-12	2021.26	4684	3690.23	136702	65559	1848.37	5233.49	7384.41	11988.5	620625	3.30907e+06	184.84	414.706	2841.4	178611	786.296	2167	87213.4	1.13322e+06	188035	99.8287	234.761	2963	18113	171830	216.314	298.916	221.642	491.233	499	4123.13	1211.86	1225.69	7660.66	31863.9	13758	9127.38	6546.31	672.927	533.656	84.6309	190.53	392.041	9988.78	439.877	707.198	831	812	669
495 #02-178 3-34-6	2074.09	6712	4006.35	158694	61119	1958.56	4773.34	7448.17	11492	643259	3.80401e+06	191.746	510.705	2455.91	173364	661.46	2892	102127	1.08957e+06	172662	160.062	229.654	2941	14950	133706	198.577	204.012	314.906	295.635	389	4529.02	1899.89	1776.75	9747.9	35379.6	16282.4	9537.1	5467.97	761.742	554.304	73.9981	113.844	407.481	9793.47	381.358	636.929	681	831	684
496 #02-179 3-34-3	2115.34	6462	4369.91	230972	52617	1844.49	6167.61	9690.87	22568.3	964960	4.71903e+06	102.226	490.841	3710.32	219111	988.951	4015	95869	1.1374e+06	186483	176.699	256.896	4272	20611	212792	163.375	265.239	344.173	334.103	364	4896.3	1467.36	1555.05	11519.3	35932.2	16722.4	11354.4	6119.39	534.783	481.417	48.0627	252.073	456.49	10481.3	397.012	344.643	529	665	519
497 #02-180 3-34-60	2116.92	7943	3519.87	108850	111521	2964.7	4699.38	10656.8	13404.1	734908	3.74858e+06	83.1492	394.704	3088.25	375677	427.809	2079	127109	1.2173e+06	183912	148.53	207.296	3197	19799	147698	205.826	199.195	180.397	260.992	394	4983.79	1746.27	1754.8	13276	44976.1	20164.4	11229.5	6575.69	1581.05	1307.74	724.726	691.724	485.008	15500.2	580.458	2794.67	3224	3582	3377
498 #02-181 3-4-6	2171.06	3077	2127.99	141462	40821	1241.49	2972.38	4539.46	12819.1	494762	2.70158e+06	60.8115	411.092	1265.08	146338	1292.66	2226	53102.5	584284	230946	85.6224	791.5	2617	10768	144570	167.881	337.544	358.83	375.591	266	3555.67	1033.31	1166.97	8900.36	26222	20222.9	7794.37	5490.08	590.577	388.35	56.1236	183.771	443.949	10114.6	411.305	287.14	423	664	416
499 #02-182 3-4-12	2162.69	5141	3217.63	121293	43281	1356.25	3219.92	5413.88	8633.75	523898	2.92114e+06	66.0853	394.721	1373.84	131860	687.013	2038	58065.2	606161	142114	110.795	251.044	1809	10845	166961	138.497	178.677	254.701	160.027	162	4797.92	1516.93	1466.31	12279.5	32378.4	21539	7906.93	5371.69	613.034	405.427	75.1285	156.968	327.879	9963.78	390.81	471.413	538	475	632
500 #02-183 3-4-3	2070.98	5504	3339.17	127364	48601	1457.56	3953.97	6026.13	14282.8	491090	3.08867e+06	105.405	388.463	1366.57	129257	796.587	2010	69498.3	751710	90527.1	119.33	200.039	2619	11226	124939	173.814	270.653	249.378	388.522	108	3575.93	1011.45	1101.57	9002.05	24938.7	15655.6	7899.11	4852.49	625.504	541.122	92.9317	123.883	342.075	9468.57	275.344	451.541	502	924	466
501 #02-184 3-4-1	2110.75	6985	3464.06	107625	62308	1458.71	3855.87	7165.42	11810.4	470496	2.79583e+06	82.0293	357.183	1507.82	137018	436.228	2340	98058.5	695997	105212	189.753	280.407	2361	13321	115734	156.763	217.342	289.72	282.929	265	4003.63	1236.57	1240.22	8907.31	32665	15767.4	8432.79	5438.47	1001.37	952.1	199.389	355.09	420.901	10224.4	281.942	1304.26	999	1508	2079
502 #02-185 3-5-1	2086.52	4521	1816.93	113593	55918	1770.92	3593.88	5090.63	11919.3	565771	3.70158e+06	99.6987	434.301	2044.65	179214	508.371	2042	104239	957116	183123	89.3535	347.303	2056	14653	167748	139.789	159.374	96.7816	546.392	380	4519.21	1311.81	1131.9	7025.61	21794.8	11629.8	9434.16	6863.47	706.712	610.837	123.409	146.14	345.19	10709.8	447.028	730.204	877	1259	881
503 #02-186 3-5-6	1966.63	3570	1619.9	116726	46212	1293.55	2619.79	5839.6	10324.5	536501	3.16506e+06	70.6432	429.26	1547.38	219648	290.593	2919	115293	1.11104e+06	168541	94.1713	225.463	2821	16734	172624	97.5551	203.174	220.987	340.518	377	4580.17	1651.26	1541.95	8521.71	24122.3	13072.3	8595.83	6134.6	608.165	465.111	89.8607	139.509	345.415	9206.59	463.299	312.836	632	903	517
504 #02-187 3-5-12	2053.49	4665	2284.25	144037	44843	1439.09	3214.54	6479.17	15878	720768	4.18734e+06	58.517	399.024	1828.78	263043	895.069	2496	120262	1.19163e+06	312613	120.722	296.324	3197	16329	191261	160.841	254.541	177.165	412.14	424	4338.97	1821.85	1768.91	8227.04	25168.6	16495.7	9376.08	7046.48	639.346	536.297	55.5855	156.908	331.325	9598.08	324.811	431.473	480	612	627
505 #02-188 3-5-60	2028.89	3461	2184.46	99594.3	87937	1315.8	2562.63	6552.88	10850.4	798399	3.36437e+06	85.0038	336.353	1668.03	205192	371.708	1594	98095.1	1.02592e+06	185700	68.2023	185.888	2425	11522	144143	108.579	141.667	93.6343	191.562	199	6009.15	2058.5	1993.63	12413.3	33587.3	16020.3	10569	5805.91	738.188	735.629	61.4098	242.422	393.579	10845.3	334.557	849.945	1191	1416	1138
506 tQC	2037.7	10805	5764.9	137747	77334	3515.74	6093.45	13074	12613	783111	4.26833e+06	188.141	334.602	2164.37	259976	340.78	2686	121479	1.36612e+06	256504	157.187	162.934	2620	24010	222442	199.417	76.8907	279.005	515.49	537	4981.38	1752.57	1528.96	12072.3	38721	13837.9	10750.1	6765.55	1104.57	827.245	160.997	232.099	404.857	12157.8	499.872	1237.46	1791	1690	1860
507 #02-189 PQC	2086.78	8339	5926.61	103555	87544	3688.72	5875.87	11009.1	12926.3	627457	3.86885e+06	220.536	382.747	2137.78	277731	715.269	2760	135973	1.53162e+06	249671	125.98	234.273	3145	21490	225716	181.085	245.361	282.89	520.106	580	4491.1	1655.21	1505.85	12052.3	38692.6	15147.8	11690.4	8527.63	840.495	736.503	158.665	303.971	512.525	12282.1	490.641	1253.76	1787	1851	1267
508 #02-190 Blank + ISTD	1860.36	10		1139.58	226		18.9201	61.1603	340.944	604.377	1873.36	37.5193	245.226	199.588	516.811	117.484	0		363.776	67.6996	33.1053	94.2333	21	35		72.6245	51.5034	51.126	70.8646	0									640.476	423.592	75.9945	146.537	348.248	9013.75	327.156	127.957	194	394	290
509 #02-191 3-5-3	2093.74	4024	2208.29	187967	73516	1536.74	3421.03	5978.83	12857.6	614843	3.94867e+06	137.05	386.923	2048.49	240364	567.649	3121	97401.3	1.36779e+06	161380	104.502	349.541	2983	16537	254859	164.492	184.272	243.139	329.525	251	6367.88	1984.71	2320.78	9737.76	31326.7	16691.9	9359.07	5968.46	676.988	525.572	218.788	260.182	460.585	10385.9	351.185	576.646	781	1336	821
510 #02-192 3-7-6	2126.1	6121	3293.64	214164	54553	1228.81	5130.67	8491.61	24910.9	851088	5.00454e+06	169.851	415.555	2459.07	204963	1493.54	3618	103843	1.4191e+06	175716	197.254	415.957	2660	19371	243084	137.228	340.482	287.832	463.971	476	5761.07	1599.78	1452.36	13545.4	39929	23278.6	12428.5	7310.4	691.042	613.244	93.8996	124.839	360.323	10016.6	388.537	294.463	460	725	610
511 #02-193 3-7-12	2211.33	4066	3361.55	258912	48111	1676.15	5943.75	8363.66	29336.8	756787	5.01385e+06	101.849	413.619	2853.89	239454	1682.35	4349	105064	1.49665e+06	269019	156.917	706.277	3717	15053	273130	201.84	301.878	437.892	437.941	511	8719.96	2119.3	2148.88	12733.7	36557.2	26098.4	12463	7869.41	537.962	503.169	59.2928	85.6548	312.85	10082.9	404.831	293.931	359	455	459
512 #02-194 3-7-60	2103.68	3968	2151.66	118115	35753	1977.03	4946.18	6320.05	14138.9	731345	4.55592e+06	171.82	400.457	2554.64	243479	1089.38	2289	75724	1.10231e+06	258241	234.681	429.892	2399	15007	205806	260.94	552.028	358.747	796.5	446	6101.27	951.933	1117.31	10667	29582.7	16652.2	11225.8	7531.84	694.473	473.526	130.174	164.278	380.518	9805.53	455.36	481.033	730	948	636
513 #02-195 3-7-1	2049.36	4083	2954.88	199707	48794	2378.03	5239.59	10712.3	28824.7	885846	5.04179e+06	239.647	431.57	2985.4	230819	3682.73	4502	74121.8	1.32963e+06	585777	123.317	2728.99	2826	19866	386372	201.48	497.995	72.814	787.621	491	6587.31	1807	1566.08	11948.7	32042.6	27246.8	12419.7	10177.1	591.414	615.737	104.081	149.163	338.907	9747.02	369.75	263.836	463	604	662
514 #02-196 3-8-1	2104.48	8791	3061.26	133494	78327	2851.35	3714.17	6749.99	12021.1	596287	3.96222e+06	132.047	378.19	2525.58	236920	510.957	2982	143124	1.41687e+06	199864	124.372	243.495	2568	19414	136823	158.482	154.231	207.978	484.429	757	3771.39	1013.14	1294.74	9269.39	34793.5	13179.9	10469.5	7394.37	786.651	708.928	143.265	236.463	395.976	10766.9	443.575	1008.19	916	1270	1193
515 #02-197 3-8-12	1968.72	7059	3423.68	132889	45827	1764.97	3852.77	5165.21	14765.3	588614	4.99045e+06	97.5344	354.185	2280.43	233057	666.427	2601	113551	1.41759e+06	237423	65.1987	360.381	2555	13392	200730	169.624	192.566	139.271	368.03	446	4161.54	1354	1516.49	10615.7	34553.6	13243.4	11616.2	6192.28	795.921	558.402	118.07	136.752	366.196	10123.9	338.149	726.002	801	786	600
516 #02-198 3-8-60	2043.31	6723	3030.29	115986	48661	1529.18	3363.44	6772.48	12198.8	573755	4.1464e+06	160.886	306.114	2638.3	254958	547.456	1843	104616	1.26997e+06	168688	127.966	140.828	2788	14057	138883	214.111	275.208	249.328	319.976	306	5405.4	1470.09	1598.77	11198.6	39911.9	16197.9	11019	8260.22	891.229	798.174	187.497	276.718	385.673	11286.2	424.524	1546.87	1149	1477	1643
517 #02-199 3-8-3	2001.87	3641	1775.02	143557	39111	1437.65	3465.34	4079.11	11780.8	477639	3.45506e+06	67.0526	427.577	1532.49	152807	567.485	2492	95524.3	1.26331e+06	120621	88.5357	182.825	2292	15099	206241	137.641	191.633	336.878	364.287	384	3596.73	1321.11	1256.52	8556.31	29941.1	12077.1	8979.55	5592.43	644.233	433.282	100.359	177.171	322.741	9709.32	309.332	370.868	517	720	428
518 #02-200 3-8-6	1979.07	3445	2203.7	129393	29951	1529.63	2838.86	4197.26	13510.5	573668	3.47915e+06	167.592	374.531	1733.88	180876	760.323	2108	94262.2	1.05518e+06	142558	88.4616	287.658	2293	14453	190358	196.76	210.271	245.538	430.851	311	3238.8	1057.83	1052.43	7221.21	23082	10528.4	8298.8	5556.43	646.557	576.762	70.9844	134.627	379.06	10084.3	320.717	416.633	394	675	506
519 #02-201 3-9-1	2093.66	7328	2219.14	102986	80916	2038.71	3789.17	5822.91	11860	674056	4.19061e+06	86.1344	444.462	1532.31	210924	466.469	1999	96253.8	911058	91448.5	165.012	171.887	2508	14580	142561	232.748	163.572	271.218	415.951	238	6315.87	1428.88	1690.31	20725.6	66138.9	18680.7	10374.1	5878.89	1784.45	1467.29	537.523	610.695	511.166	14905.8	516.435	2705.3	3083	3473	3226
520 #02-202 3-9-3	1903.42	4688	2587.27	100815	62008	1720.39	5373.1	6551.58	16060.6	636748	3.91396e+06	74.9702	337.707	1222.17	164301	395.586	2116	77872	966588	82423.6	98.4364	231.412	2568	14709	157981	158.371	267.024	329.649	473.993	157	5303.49	1532.46	1620.57	12137.8	42575.7	15491.3	8857.95	8497.98	1107.58	1063.63	153.453	291.149	372.449	14283.4	451.881	1327.22	1967	2020	1900
521 #02-203 3-9-6	2176.57	2833	1020.05	114911	68340	1403.24	2597.32	3890.55	9733.33	458247	4.18487e+06	107.39	492.256	1821.89	146899	416.797	1711	53380.4	2.46018e+06	129112	327.046	428.279	5329	30192	466354	346.004	651.632	194.327	408.203	191	11733.6	3262.1	2439.26	23803	90734.6	32101.2	17117.6	11601.2	1476.43	1304.24	195.919	310.965	396.94	28726.3	391.968	1967.81	5167	5384	2517
522 #02-204 3-9-12	2048.36	7649	1850.11	80594.6	91515	2452.91	2554.48	5127.45	11071.1	539056	3.2694e+06	84.7645	355.598	1803.38	210065	514.432	1995	99575.1	860099	154160	587.966	307.637	2238	14862	145302	364.667	357.042	94.155	363.388	347	7123.54	1491.16	1655.23	22961.3	79524	18937.3	11204	8462.05	1658.2	1494.18	414.459	620.411	513.646	15659	429.323	2928.26	2935	3320	3351
523 tQC	2072.54	8762	5261.6	141132	89969	3352.29	5942.35	10973.8	12578.6	672618	4.17072e+06	121.075	537.917	2339.77	237767	566.042	2588	133432	1.66273e+06	229698	121.445	176.364	2970	24280	217089	131.994	128.559	133.053	389.376	443	5035.81	1912.74	1637.39	12677.6	40743.9	16797.9	11728.1	6851.4	992.554	847.705	192.496	279.22	316.982	11860.9	371.631	1319.27	1120	1605	1733
524 #02-205 PQC	2111.87	7880	4803.81	152866	82445	3331.76	6179.32	10446.2	12182.3	674505	4.00118e+06	171.379	360.409	2258.97	266543	425.922	2456	115635	1.63807e+06	247282	72.1172	294.659	2863	21091	259478	166.046	218.723	236.949	359.378	513	4390.84	1687.63	1437.79	10726.2	42432.7	15410.3	11897.1	8739.93	1221.79	991.884	280.358	477.174	391.479	12671.7	419.265	1548.73	2194	2500	1622
525 #02-206 3-9-60	2092.04	7236	1618.56	55664	69924	2165.83	1836.12	3041.3	5790.62	381718	3.84924e+06	35.391	403.966	2697.5	311655	232.269	1204	50022.4	891284	199896	279.21	208.953	1191	13513	171494	380.529	308.35	40.24	212.545	201	11976.5	2818.84	3501.31	39968.6	109575	34140	16635.2	10231.5	6224.62	5791.85	949.552	1111.64	1364.97	40899.6	1229.98	9723.44	7328	8828	12109
526 #02-207 4-10-1	2024.1	7019	4464.74	130299	50687	1687.72	4761.57	7112.93	15318.8	571903	3.8321e+06	138.455	341.469	2282.67	174076	861.851	3217	89535.1	1.4565e+06	179620	167.921	374.362	3448	26597	248541	195.05	263.813	338.627	502.467	535	3579.33	999.568	788.477	7039.55	29109.2	11187.3	10463.1	7002.19	736.84	627.998	165.016	231.332	467.981	10066.8	350.001	976.028	930	1192	1164
527 #02-208 4-10-12	2047.65	7815	4879.36	160006	57161	1622.32	6507.14	8477	11874.4	618454	3.40963e+06	61.0882	312.155	1524.1	187471	833.785	2159	75974.4	971854	157277	88.2288	263.734	2723	17058	181226	151.995	354.441	244.455	336.446	430	4628.98	1035.88	1003.64	7198.04	25798.5	14617.7	9017.53	7016.49	781.061	663.388	121.498	157.788	356.635	10691.7	385.037	618.067	631	922	430
528 #02-209 4-10-6	2124.46	4152	3652.41	118359	49248	1198.49	2978.85	4374.96	7076.7	518525	2.52159e+06	69.5221	309.21	1047.35	113730	494.073	2199	73885.8	975262	110840	48.0163	292.518	3824	17399	171667	165.891	215.171	299.959	182.456	391	4958.46	1666.54	1207.58	8753.47	32148.5	17623.1	7902.15	5427.85	684.662	577.652	133.558	241.453	415.065	11194.9	340.982	476.094	992	1285	496
529 #02-210 4-10-3	2035.63	5981	3863.14	135431	45611	1499.85	4770.14	6109.39	16543.4	578636	3.42182e+06	116.73	295.961	1764.7	170529	733.019	3455	77857.3	1.1374e+06	134347	118.618	355.955	4840	18663	168056	221.498	359.705	279.648	500.141	392	3734.91	1049.24	905.157	6667.83	25425.7	13656.6	9266.65	5639.47	534.14	495.156	151.55	122.416	371.029	9462.79	343.893	402.612	516	844	718
530 #02-211 4-11-12	2111.1	6093	2393.56	126000	57517	1908.37	2206.19	5388.2	9595.16	536068	4.60768e+06	96.557	381.015	2293.11	289226	359.548	2271	137423	930753	164832	48.0027	308.475	2911	17573	103030	141.812	198.96	385.543	554.656	471	6516.49	1765.38	1782.45	15351.7	48435.3	19855.7	12375.6	7100.4	1052.01	966.288	209.656	299.137	434.946	11350.9	390.289	1776.64	1260	1512	1937
531 #02-212 4-11-3	2035.53	6468	4220.02	153297	64215	1888.29	3374.19	6963.79	15533.8	751429	4.1281e+06	97.9803	401.036	2424.97	253765	732.304	2804	121242	883808	147995	155.919	268.177	3494	18173	107585	142.943	141.756	331.699	511.221	496	5867.46	2090.26	1834.46	13849.5	49037.1	22314.8	11624.6	5155.14	700.337	553.961	83.9394	174.853	466.678	11237.4	441.751	524.622	754	1031	829
532 #02-213 4-11-1	2035.96	8203	1648.88	76376.2	70539	2129.4	1399.01	3440.81	4972.87	399920	2.84499e+06	106.302	379.417	2440.97	248586	160.712	2120	122120	792185	165804	166.1	272.632	1952	15138	107057	123.74	247.658	122.706	341.973	564	5697.62	1727.22	1568.2	12003.5	43195.8	22667	9712.81	6513.45	2343.71	1816.94	684.468	927.358	479.722	16096.8	445.093	3974.11	4311	4842	5237
533 #02-214 4-11-6	2067.09	9137	3459.42	95689.9	91874	3223.18	2074.18	6989.89	9383.5	607387	3.7976e+06	111.167	334.055	2315.29	342142	393.606	2105	115316	905264	197995	70.6742	237.679	3081	17363	98675.3	163.852	234.421	141.469	404.383	429	6361.06	1894.98	2250.97	16329.9	49100.2	20568.2	12368.9	8552.97	1459.15	1038.85	305.462	558.226	501.714	13348.8	420.064	1993.89	1965	2761	2326
534 #02-215 4-12-6	2115.52	4817	3181.81	137835	44221	1584.6	2804.57	5332.12	10354.8	518659	3.32845e+06	100.497	346.923	2225.87	157133	683.916	2120	99816.9	1.16069e+06	118027	37.3986	180.842	2504	10642	165320	123.243	170.895	256.641	458.761	222	4040.97	1645.46	1431.46	9328.69	29390.5	14203.1	8481.58	5750.95	897.155	642.871	118.328	189.699	362.892	11710.3	414.231	1135.3	1063	1502	998
535 #02-216 4-12-1	1936.55	7466	2587.31	149514	42199	1480.73	2795.72	5860.91	10086.4	489469	3.5416e+06	55.2193	290.189	1586.47	178456	715.063	2363	110603	968871	177015	46.9135	118.157	2663	15844	156895	129.535	83.465	124.27	459.484	434	3573.47	707.228	930.733	6500.23	23044.2	10963.3	8157.16	6088.03	967.506	743.997	214.999	551.608	376.618	9783.65	346.643	1082.6	926	1434	976
536 #02-217 4-12-3	2123.08	4291	2830.37	135940	51897	2232.95	2748.72	4917.05	12133.1	590857	3.92642e+06	92.6937	329.98	2046.64	171239	589.882	2190	97510.5	1.24126e+06	136558	129.902	162.277	2874	14694	192621	173.476	125.453	209.069	484.927	380	5011.37	1195.73	1311.17	11446.2	34391.7	13305.1	9634.36	6357.86	874.769	637.294	120.969	216.552	364.17	11374	376.232	754.767	1321	1279	824
537 #02-218 4-12-12	2068.87	3968	1921.65	114346	40165	1274.61	2630.96	3822.75	9958.24	552055	2.98778e+06	111.053	349.956	1879.11	117030	549.426	2235	61815.6	768492	81287.9	49.2651	193.785	2240	10135	103849	141.22	225.528	130.026	220.731	320	3328.31	1006.12	1073.42	8701.1	26589.4	13510.5	7217.99	5049.93	588.396	629.165	99.5058	158.285	349.889	10215	327.056	460.671	886	971	528
538 #02-219 4-13-1	2035.11	3937	3121.4	144104	33911	1660.89	4239.6	6118.83	14730.8	487297	3.59428e+06	71.6729	335.604	1870.83	147218	700.512	2244	101398	1.21072e+06	155748	52.2272	219.888	2830	12407	138168	137.439	213.969	145.079	374.715	196	5079.23	1749.92	1803.19	9212.65	26354.7	15065.7	12339.5	5807.56	476.767	647.955	92.3754	131.915	434.763	9150.33	337.768	332.113	432	574	483
539 tQC	2136.06	8418	5135.77	130604	67504	3880.74	4643.71	10356.5	13311.6	695463	4.13158e+06	195.6	478.716	2080.04	208688	552.263	2498	154592	1.48352e+06	233856	112.752	100.123	3002	20280	227072	136.738	209.455	198.133	282.94	359	4065.72	1695.49	1635.83	11588.5	38637.5	14994.2	12599.3	6948.44	878.384	795.011	117.648	208.235	451.775	10811.8	333.473	1347.84	1241	1546	1630
540 #02-220 PQC	2091.25	7754	5191.72	127505	75078	2889.1	5514.53	9749.16	10418.1	591249	3.44574e+06	273.971	370.79	2020.46	207082	375.568	2346	110018	1.26264e+06	238875	129.745	191.794	2476	20768	219054	123.732	173.838	197.054	231.392	580	3936.23	1602.08	1072.24	10616.5	36191.6	13406.3	11081.4	6850.14	940.927	636.679	221.272	197.53	394.79	10959.5	368.309	1414.01	1713	1721	1741
541 #02-221 Blank + ISTD	2011.32	68		678.512	160	9.6781		72.7675	187.814	1165.54	3675.36	21.3033	244.434	219.055	560.306	138.119	0		897.878	105.524	27.3916	67.4367	0	25		63.0015	22.5612	27.7746	30.2752	10	64.934				174.375	62.7509			541.926	448.643	49.1276	129.289	337.322	8194.37	356.385	154.375	212	2	163
542 #02-222 4-13-12	1991.54	4953	4476.39	136657	59627	1852.74	5510.17	12179.3	15077.3	733805	3.92146e+06	74.4236	379.568	2099.3	170555	566.494	2530	84102.8	1.2217e+06	171520	109.863	250.808	2912	14971	206774	165.129	173.905	264.633	482.613	262	4823.44	1583.7	1334.63	8566.35	26825	11736.4	11484.6	6610.84	585.7	508.838	63.7131	157.677	315.961	9859.83	359.747	632.548	800	955	572
543 #02-223 4-13-6	2042.07	4492	3078.89	148398	48667	1299.17	4883.11	8427.85	13051.6	729061	3.27443e+06	121.661	339.965	1806.36	131247	558.895	2661	83718.3	1.24447e+06	138528	83.2637	234.395	3038	12941	167914	106.391	187.636	222.464	221.596	114	4938.16	1622.34	1342.77	8047.06	26838.8	13735.5	9175.3	5686.67	630.477	488.234	74.0278	150.787	325.061	9869.73	403.301	501.226	791	1137	626
544 #02-224 4-13-3	1996.08	4623	2766.54	136265	43523	1737.26	4404.69	6295.46	14200.1	656774	3.60821e+06	86.3321	339.657	1763.38	128942	544.924	2172	98693.6	1.30276e+06	159039	125.316	264.208	3051	16639	208223	138.551	207.141	142.937	264.984	322	4527.76	1536.74	1305.49	6945.76	23206.3	12435.2	9205.21	6621.29	590.738	612.048	101.086	200.761	253.84	10299.4	297.704	537.247	681	934	694
545 #02-225 4-14-6	1970.41	4416	2562.75	172900	41729	2390.6	4110.56	6785.07	15162.6	787097	3.61784e+06	77.5116	361.909	1643.97	194441	1030.49	2461	83934.3	1.37845e+06	470852	147.353	550.014	2563	14803	214714	168.709	252.96	199.12	513.122	381	4351.52	1366.77	1434.4	12030.6	29463.4	15100.4	9233.4	6418.97	1022.9	761.263	183.825	501.16	417.137	10524.3	395.447	642.227	886	1458	831
546 #02-226 4-14-3	2005.35	4601	3055.79	142837	49810	2306.46	5270.45	8268.23	17925	592943	3.42955e+06	105.211	337.395	1947.95	237103	930.616	2079	92090.8	1.38997e+06	362110	125.601	219.515	2777	16776	175707	176.743	277.918	237.855	400.767	502	4191.71	1696.84	1856.73	12172.9	30966.2	13915	10955.5	6454.1	678.467	575.449	112.827	131.619	443.165	10656.2	404.961	637.504	707	969	1102
547 #02-227 4-14-1	2014.19	3311	2401.63	128999	50354	1399.3	3989	5998.11	11784.1	556461	3.04906e+06	87.7967	313.497	1704.07	186718	531.614	2061	99208.2	1.31859e+06	244990	136.215	309.949	2187	17245	208825	147.342	290.134	215.237	311.263	240	3651.19	1508.77	1456.02	9792.31	24765.9	16514.7	8895.83	6352.99	644.476	518.141	184.651	314.18	343.727	10427.3	432.907	606.882	1195	1300	860
548 #02-228 4-14-12	2135.29	4075	3589.68	159792	36996	1693.94	5495.04	7924.46	17853	549886	3.74218e+06	155.738	289.722	1472.48	180417	721.542	2486	98875.4	942156	199193	95.8101	161.875	2482	14108	148838	153.678	252.315	287.351	292.044	379	4735.02	1641.17	1453.67	10940.5	33050.6	16816.2	9213.22	5504.69	677.257	441.633	92.0758	216.824	322.734	9240.86	320.328	446.725	592	585	517
549 #02-229 4-15-1	2067.72	4499	3248.34	114732	42652	1735.48	4323.49	7524.59	12150.1	663249	3.77141e+06	119.829	292.245	2073.62	152107	346.887	2424	129504	1.13818e+06	258158	54.1072	132.181	2708	19057	319611	111.575	89.1704	168.587	368.007	285	4572.97	2204.6	1741.74	10256.3	30884.6	19802.4	10992.8	6729.25	715.194	489.445	54.1207	179.97	334.328	11255.1	349.299	801.007	1265	1128	849
550 #02-230 4-15-3	2018.26	5854	3691.25	160645	50378	1908.64	5000.87	9720.14	18101.6	628531	4.37986e+06	100.008	351.493	2158.29	168841	515.721	2937	130095	1.21235e+06	121859	116.575	141.04	3099	18263	216222	144.136	241.493	375.653	410.11	610	3653.15	1408.61	1486.74	9140.01	30048.9	14688.2	10361.2	7089.16	469.338	540.186	61.616	198.378	294.966	8925.59	323.853	273.192	534	744	361
551 #02-231 4-15-6	1996.03	6789	4414.72	258611	47666	3904.91	7473.94	11084.3	25681	757403	4.87717e+06	87.8168	401.688	2409.09	181936	1781.28	4339	140055	1.36463e+06	762064	110.419	760.452	3525	30527	326720	164.254	325.894	418.198	711.532	685	4512.31	1190.2	1230.44	9180.3	30687	15806.2	11892.9	8075.1	773.877	526.826	73.2108	170.669	294.657	10254.5	428.474	536.395	534	887	757
552 #02-232 4-15-12	2050.36	7066	2594.15	100408	53368	1990.29	3313.43	7352.9	12191.2	506033	3.7032e+06	199.655	375.339	2236.98	157695	180.162	2032	101049	1.02428e+06	180606	152.744	214.79	1248	19534	243065	192.027	206.143	88.1992	296.164	674	4902.83	1300.06	1502.74	10331.4	33248.1	13808.1	12867.4	7222.97	3047.26	2580.02	528.08	797.579	716.032	19451.5	795.17	4302.06	3974	4667	4805
553 #02-233 4-16-1	2010.11	6010	3127.05	155268	53130	1842.52	3802.77	6176.15	14114.1	495893	3.29386e+06	85.3631	316.546	3878.72	146985	765.827	3143	135972	982607	244355	92.2488	176.496	2338	11392	266593	172.747	187.671	261.308	642.647	600	4376.43	965.283	992.915	6643.89	26479.5	10368.6	10134.4	6845.03	983.718	854.894	147.03	156.344	375.958	10865.9	339.232	1038.76	1105	1262	1288
554 #02-234 4-16-3	1950.85	7878	3384.53	131987	52494	2837.4	3758.61	5893.64	12815.6	490109	3.06719e+06	81.0371	267.442	3345.3	115235	831.184	2533	94023.6	1.05226e+06	463656	128.763	647.772	2128	12448	305257	138.928	203.614	172.297	477.585	350	4422.59	1362.65	1026	6271.69	22206.6	13849.7	9570.25	6986.87	928.388	723.239	164.6	251.7	508.456	9487.89	340.12	556.106	1068	1125	1067
555 #02-235 4-16-6	1956.88	4754	2669.49	169868	48579	1568.12	3923.6	6172.77	13525.8	555937	3.44072e+06	135.056	333.922	2289.08	117698	648.707	2909	69156.8	853838	295528	55.6299	207.426	1991	11118	316755	149.97	176.644	276.48	476.539	340	4649.16	1427.61	880.726	6002.95	20045.9	13435.2	10847.6	5824.11	528.148	486.987	82.1163	186.803	237.552	9583.9	369.628	395.342	481	743	417
556 tQC	1993.99	8871	3681.07	116216	71256	3478.86	4808.14	8775.94	11983.4	564094	3.95181e+06	205.3	400.835	1994.08	228057	365.459	2008	104819	1.34618e+06	224950	88.0599	136.535	3265	20601	191265	147.133	149.62	201.865	441.242	475	4490.02	1569.69	1412.87	11384.1	39482.4	14642.9	10930.9	6874.76	844.111	727.117	146.132	234.442	425.63	11000.5	406.217	1176.54	1232	1244	1328
557 #02-236 PQC	2279.21	9539	4160.14	121397	65884	3197.42	5466.81	8099.84	11040.5	561257	3.87242e+06	157.047	361.899	2008.98	233559	484.62	2123	145596	1.40923e+06	236437	90.6265	219.61	2630	20028	247725	115.282	256.671	241.043	366.009	423	3619.4	1449.47	1302.15	10217.7	38446.9	14420.8	10567.5	7565.35	890.192	783.533	188.688	362.714	454.712	11351.1	392.612	1381.08	1724	2174	1643
558 #02-237 4-16-12	2106.57	4320	2693.25	135489	46435	1718.51	3011.54	4972.28	10146.2	480583	3.36613e+06	97.5316	335.219	1938.51	104990	728.76	2469	110510	1.14955e+06	148400	117.039	260.48	2820	14439	248736	190.285	193.716	310.598	456.005	303	4410.08	1084.97	1074.66	7731.72	22266.7	12429.1	9604.14	6833.78	612.703	410.185	96.9995	132.28	332.454	9749.36	339.999	299.784	712	892	522
559 #02-238 4-17-6	2046.45	6479	5638.6	151039	61099	2315.11	7491.41	8649.78	13228.7	748222	3.41678e+06	89.6724	342.867	2098.65	161262	702.867	3095	83199.1	1.05095e+06	452318	60.4529	267.466	2708	16469	310734	100.866	212.085	165.851	698.19	497	3935.63	1151.13	850.703	7300.96	24714.6	10069.9	10189.2	5886.34	1056.98	1044.49	175.914	280.693	424.703	10641.1	461.345	1645.03	953	1265	1890
560 #02-239 4-17-12	2019.46	4289	3554.16	111543	42543	1958.78	5838.54	7815.55	15775.5	706561	4.31122e+06	103.604	427.337	2514.42	132739	1083.99	2767	97209.6	959036	182223	114.865	251.058	2696	18243	215368	137.22	232.297	324.469	917.848	423	4244.05	1439.87	1259.38	8593.98	32453.2	12717.1	9964.81	7090.94	733.341	505.919	124.051	353.711	372.069	10079.1	428.74	622.416	982	1007	539
561 #02-240 4-17-3	2035.28	7925	5359.45	140518	64938	2820.34	8195.94	12338.2	16512.4	659990	4.01888e+06	147.656	379.617	2185.34	184268	972.253	4252	107800	1.10057e+06	146281	52.0684	261.073	2902	15637	203768	140.723	186.605	390.342	787.072	381	4190.58	1659.03	1396.33	8117.1	25926.8	16609	10218.6	8358.32	1239.78	844.692	242.328	378.645	459.716	11167.6	480.093	1328.71	1308	1726	1711
562 #02-241 4-17-1	2094.96	6549	4841.87	158045	59571	2099.32	6512.71	9315.23	15439.4	587793	3.43555e+06	134.667	352.006	2283.05	222277	899.3	3656	121804	1.31684e+06	173875	75.9728	505.966	3488	15029	240699	180.954	273.253	316.43	646.053	352	4392.32	1777.56	1314.56	7924.1	29005.5	17747.1	9706.08	6400.34	1150.38	892.207	239.904	421.598	415.912	11684.5	442.755	902.16	1281	1548	997
563 #02-242 4-19-1	2094.93	7884	4201.59	119184	113187	3081.8	3823.3	16608.4	6216.66	615244	3.11048e+06	116.257	350.663	2610.44	317464	565.744	2917	140851	721763	238910	95.6989	182.402	2717	15430	108283	219.922	126.102	199.469	383.44	717	4767.73	1742.95	1944.88	15238.8	44733.6	20506.3	9920.24	7243.9	1569.54	1287.46	330.311	697.412	452.205	12969	368.865	1682.29	1567	2499	2036
564 #02-243 4-19-3	2079.31	5158	3305.92	134379	60296	2142.99	2790.2	6824.41	7930.5	555499	4.0468e+06	42.4009	341.82	1365.27	176649	530.226	2365	110411	877133	198582	83.9764	359.087	3008	16864	208309	147.652	195.14	370.67	432.464	596	5215.79	1764.38	1702.48	10509	38016.6	19741.6	9963.51	5931.02	933.597	850.819	175.268	355.094	311.586	11086.1	542.126	983.294	1479	1382	1152
565 #02-244 4-19-6	2032.61	7230	4180.42	131989	68727	2355.73	4445.06	9673.12	10846.8	658328	3.6077e+06	60.5227	381.951	1441.98	186399	388.682	2795	102589	870406	195614	97.8584	291.572	3361	18382	183057	120.47	175.3	272.807	401.822	477	6509.92	2631.58	2177.98	15496.9	40412.1	26849.9	10764	7613.28	687.79	550.224	138.546	223.304	456.532	10885.3	399.636	757.937	1145	1146	1072
566 #02-245 4-19-12	2023.22	4767	3494.32	123796	48463	1805.9	3321.33	6589.62	8261.89	557871	4.09263e+06	58.759	425.446	2057.44	191022	398.595	2178	71885	652768	173857	47.9816	251.94	2134	13123	144608	171.396	207.968	236.159	310.742	184	3700.53	1405.5	1353.98	10342.9	33761	18440.2	8191.3	5118.71	805.112	636.439	161.837	212.871	366.873	9756.18	339.603	1174.36	673	887	1053
567 #02-246 4-2-3	2025.76	5982	2835.6	126794	44187	1288.55	3328.59	4952.75	13982.4	579979	3.24149e+06	48.6199	380.086	1840.83	157827	562	2672	99884.7	1.029e+06	144887	124.362	221.937	2376	16080	185822	172.102	200.393	220.194	413.866	174	3327.41	1128.17	940.749	5464.07	17547.4	11024.7	8402.33	5709.64	842.592	751.741	213.609	265.049	474.137	10471.5	428.265	760.838	990	886	1283
568 #02-247 4-2-12	2051.19	4523	2588.33	136556	47879	1479.02	3013.78	6679.18	10724.6	614277	3.048e+06	99.274	400.084	1626.78	168720	467.999	2803	90761.2	1.1484e+06	148306	120.369	217.288	2338	15593	172047	115.995	197.045	229.846	274.891	309	4024.17	1138.25	1049.7	7659.71	20046.6	11227.1	8581.77	6922.75	705.687	587.375	86.7695	250.826	367.151	9650.37	380.261	518.06	719	904	742
569 #02-248 4-2-6	2081.74	3736	2106.7	121891	52905	891.69	2548.97	4272.51	11686.8	445946	2.36285e+06	44.4852	391.856	1229.09	115036	575.768	1640	73810.1	1.11304e+06	113027	72.7541	204.379	3520	12170	189275	127.275	343.081	223.223	182.888	288	5181.58	2207.21	1449.67	7862.78	20672.8	17309.3	7874.46	5693.63	564.127	540.573	112.821	173.415	427.023	10005.6	396.655	529.801	836	1021	644
570 #02-249 4-2-1	2051.79	6079	2074.96	92464.5	56654	1814.93	2774.16	5733.38	9727.13	484047	2.80156e+06	158.474	376.201	1583.79	155259	518.309	2487	116582	1.00855e+06	173726	158.683	226.24	2344	19555	153616	142.005	201.906	148.906	267.305	503	4495.76	1076.74	917.493	5807.39	19866.9	11551.6	8370.2	5370.18	921.335	659.047	257	374.143	602.862	10590.5	492.82	1173.42	1075	1325	1425
571 #02-250 4-20-1	2218.29	5114	3291.39	156444	49398	2044.88	3769.33	5733.13	15373.3	760809	4.00131e+06	133.385	425.434	3018.75	246899	710.114	2670	97017.5	995421	222581	121.148	265.469	2908	13928	146260	200.595	165.974	201.101	408.962	417	4314.44	1147.1	1308.46	10217.6	38130.8	12603.9	11643.4	7917.02	759.954	485.293	110.369	161.643	403.879	10612.3	377.036	394.353	343	527	297
572 tQC	2167.98	8975	5808.47	129709	80661	3478.84	5345.4	11771.5	11429.4	569316	4.05802e+06	224.988	484.508	2271.67	244348	515.562	2436	140485	1.6169e+06	247127	49.8189	250.233	3719	24476	233199	142.529	176.268	186.502	431.482	524	5413.15	1563.26	1276.7	12157.2	42663.6	15273.4	12702.2	8060.37	1061.32	909.595	121.697	330.089	437.671	11689.9	441.876	1450.54	1378	1580	1592
573 #02-251 PQC	2172.78	8182	5553.83	156803	100679	3294.8	6791.53	9974.67	13146.6	623746	4.26161e+06	189.476	513.955	2418.78	304774	518.799	2781	152626	1.75238e+06	262474	92.551	248.272	3039	23884	207365	203.245	176.655	206.913	451.587	535	4787.16	2077.92	1568.54	13875.8	45328.6	15485.9	10651	8125.95	1191.78	804.919	196.35	297.625	425.968	13217.9	466.772	1437.87	1544	2163	1654
574 #02-252 Blank + ISTD	1922.93	56		1454.49	199		17.7788	109.247	281.064	1505.94	6353.15	24.4203	309.226	340.948	731.68	111.962	39	151.924	1334.69	284.653	34.7471	77.6832	15	13	353.279	95.7476	47.6666	36.8326	40.4825	0	151.176			42.043	234.73	86.3662			670.529	402.838	164.799	219.095	282.205	10431.3	330.569	273.399	409.99	571	238
575 #02-253 4-20-6	2371.53	4001	2092.69	111051	35427	1163.06	2137.72	3479.85	7429.14	408370	2.93468e+06	61.4761	420.294	1714.97	122746	586.815	1741	70896	716288	97347	55.987	187.571	2972	10125	87339.1	168.641	139.858	240.44	214.325	217	4812.66	1381.21	1515.14	9970.11	28540.1	15743.3	8318.29	6059.43	716.286	591.482	83.7886	126.646	475.032	11611.8	419.522	338.205	666	674	623
576 #02-254 4-20-3	2103.1	4832	3155.4	151233	54366	1586	3518.14	5410.89	17309.9	726471	3.48392e+06	124.82	450.869	2481.46	194196	663.074	2039	96337.2	896511	130437	234.723	261.34	3012	14112	125468	233.855	283.443	343.001	476.036	292	4426.49	1354.65	1374.55	13509.6	37815.9	15589.6	9696.15	7523.6	528.759	498.906	68.1992	203.23	461.861	10259	382.515	385.895	541	607	545
577 #02-255 4-20-12	2206.88	5468	3283.45	160148	43980	1648.53	3708.62	4628.19	12064.9	623138	3.89031e+06	129.053	426.999	2610.98	270372	681.464	2293	91078.1	1.04832e+06	158144	63.2491	350.002	2774	12181	124721	174.427	258.397	133.34	364.921	279	6244.49	1716.12	1858.14	11581.2	41826	19102.9	10421.7	6756.54	673.444	550.041	61.6094	192.055	346.133	10955.8	389.928	287.267	513	566	674
578 #02-256 4-21-3	2185.69	5899	2826.61	125958	80664	1669.02	3759.75	8746.27	8684.19	638397	3.06432e+06	80.3208	411.409	2012.98	177908	378.528	2242	111818	1.37112e+06	184746	71.6464	185.367	2595	18154	204908	150.234	132.963	96.7525	329.466	258	4699.39	1744.63	1437.47	8718.35	26638.6	17037	9256.75	6466.41	712.462	618.815	200.453	198.387	346.383	11336.9	408.031	900.648	958	1171	1183
579 #02-257 4-21-12	2173.44	11800	3656.45	125408	160224	4523.17	4106.44	12784.5	11400.9	654054	4.14267e+06	102.979	421.928	3294.25	421750	358.979	2704	161062	1.46763e+06	302173	71.3734	165.17	3826	26999	153897	175.332	130.062	140.122	298.336	491	5852.54	1634.17	1710.25	14623.3	46252	19063.6	10923.3	8307.58	1506.55	1180.47	405.933	458.689	583	13899.6	505.93	2260.91	2677	3460	3239
580 #02-258 4-21-6	2084.58	4823	3379.99	200651	81413	1873.74	4470.61	11344.3	16685.3	751949	3.5574e+06	101.517	390.053	1893.04	184127	523.368	3359	155160	1.58164e+06	240093	19.3671	172.931	3511	23394	251671	128.528	141.197	256.411	518.919	704	6126.4	1952.7	1634.35	9640.03	32101.4	20506.3	8461.4	4652.11	736.266	501.937	114.86	306.141	364.022	11329.2	396.317	408.227	700	1101	602
581 #02-259 4-21-1	2287.27	3902	2200.37	126338	75744	1661.3	3871.37	7835.25	13746.7	594051	3.03965e+06	76.79	368.99	1835.88	162404	568.151	2026	99635.7	1.97975e+06	225558	102.028	152.27	2562	14822	257550	147.266	198.909	138.224	236.769	280	5162.84	2521.01	1878.53	9608.64	26828	21078	10274.9	7410.19	844.122	708.007	173.576	355.48	379.13	11363.2	316.848	836.857	1573	1521	933
582 #02-260 4-22-12	2158.31	4182	2820.82	135960	40598	1282.39	3145.87	6342.17	16599.3	658290	3.17518e+06	120.797	404.865	2607.32	124826	1139.56	3096	89884.9	1.11331e+06	68516.2	124.24	276.431	3268	16333	132529	155.582	223.163	474.335	293.994	263	4832.17	1442.52	1524.76	7821.1	26603.5	10426.1	7409.46	5638.16	781.407	548.886	120.411	248.935	409.462	10666.7	555.305	740.779	656	563	708
583 #02-261 4-22-6	2048.54	6903	3322.7	166599	50422	1628.06	4745.55	8210.35	14955.3	728427	4.49003e+06	106.251	418.176	2890.73	194210	777.364	3743	125126	1.12427e+06	132952	78.3105	257.326	3678	18872	143730	150.246	244.686	290.038	485.302	420	4711.75	1844.63	1587.25	11756.8	33992.4	17758.9	9475.57	7058.63	824.394	698.448	185.764	360.309	411.348	10514.8	377.114	671.743	702	852	716
584 #02-262 4-22-3	2042.68	4370	3010.71	177546	44656	1786.32	5133.76	6789.22	22855.3	853549	3.93923e+06	116.011	476.088	2704.39	177602	959.705	2982	138192	1.16442e+06	108110	147.151	244.527	3123	18553	159624	178.565	240.784	314.049	533.245	322	4193.66	1848.02	1593.57	10285.4	29102.9	12730.1	10118.7	7004.41	783.818	382.33	108.89	204.6	335.994	10148.3	375.173	329.755	479	742	567
585 #02-263 4-22-1	1959.81	3904	3608.83	225051	54323	2016.11	4888.54	8991.41	25121.1	794201	3.86302e+06	89.0319	397.637	2768.35	231904	1034.59	3550	115156	1.38842e+06	148783	69.0586	314.028	4797	25573	183373	196.458	292.865	428.645	682.957	578	5055.17	2038.63	1446.1	9267.8	29044.5	16000.3	10204.5	6800.58	580.569	412.157	73.9681	261.772	389.733	10716.1	367.789	264.323	552	801	362
586 #02-264 4-23-1	2132.68	6637	3358.98	79376.7	57012	2289.38	4427.55	6598.24	8141.86	549148	2.85032e+06	134.918	346.393	3768.85	157331	319.153	2216	99506.9	553320	122467	70.9401	125.758	1620	11275	100736	188.804	216.368	83.9709	175.165	321	5318.3	1443.28	1234.05	10151.2	36792.3	15328.8	10155.2	6631.04	1370.27	1088	265.589	405.146	480.89	13790.9	535.52	2280.63	1717	2012	2515
587 #02-265 4-23-6	2087.76	8277	3373.75	89203.8	55113	2039.24	3520.08	6911.47	11581.4	546085	3.1966e+06	71.9754	383.395	2053.65	144064	489.185	2182	101158	565730	108065	121.793	240.775	1975	11414	79174.7	271.599	172.23	169.872	128.549	166	3290.6	1331.28	1326.89	10162.1	30933.3	13807.8	7633.23	5086.58	948.028	674.239	216.931	341.769	467.772	10459.5	606.573	1284.19	1366	1472	1605
588 #02-266 4-23-12	2155.31	6540	3328.96	143603	49391	1668.75	4168.03	7263.49	12286.6	597614	4.28615e+06	101.876	401.745	1858.08	169780	423.094	2164	119205	717904	82685.9	107.045	241.148	2228	12780	133121	168.505	110.083	190.108	292.011	286	4650.73	1695.35	1673.06	12532.2	39704.6	16301.6	9356.88	6756.09	843.844	690.641	185.265	335.476	443.326	10992.1	368.2	1105.64	1104	1454	1757
589 tQC	2045.01	7516	4681.13	133545	93537	4194.1	5428.95	11524	12177.9	764709	4.27707e+06	150.297	417.963	2292.81	239329	517.569	2256	128972	1.53857e+06	257352	145.602	245.333	2802	21681	228278	165.412	129.907	216.979	470.207	504	4843.47	1688.73	1689.02	11486	41325.5	15894.2	12111.2	7784.82	1018.11	822.874	178.297	341.298	360.201	11841.5	401.811	1578.51	1566	1922	1894
590 #02-267 PQC	2105.86	8687	4793.45	128591	77406	2978	5157.58	9140.86	11838	689290	4.46627e+06	227.629	383.434	2212.01	237494	317.075	2535	138688	1.52546e+06	258056	105.098	128.697	2757	21680	235562	145.367	145.275	202.391	373.769	536	4983.55	1493.94	1471.07	11442.8	40256.4	15177.5	11306.3	7994.28	1037.51	797.98	241.113	287.373	522.263	12416.4	452.606	1555.83	1774	1591	1482
591 #02-268 4-23-3	2195.72	7349	4915.94	149768	60726	1990.62	6391.91	9820.26	12798	623525	3.02311e+06	103.473	398.725	1523.1	195673	572.472	2328	99581.3	636204	133479	84.9793	190.847	1761	11364	123916	177.44	101.73	98.6827	218.791	242	3890.03	1818.29	1489.46	11154.8	33231.7	17246.4	8316.95	6078.74	712.669	624.225	121.056	234.347	417.849	10069.4	520.521	469.549	518	717	779
592 #02-269 4-24-12	2206.56	9755	6097.64	296211	65586	2883.9	7564.33	9646.71	31126.8	1.10689e+06	5.90585e+06	89.767	481.99	2683.32	318730	1182.28	5416	273788	3.19595e+06	283860	121.991	455.149	9498	56709	467978	151.069	486.201	992.597	1566.11	1569	9867.79	2583.49	2445.73	17678.7	49600.5	20816.8	15285.5	10521.4	536.128	530.175	121.044	207.932	516.922	11404.6	512.962	576.046	583	718	461
593 #02-270 4-24-1	2160.86	9097	5892.05	271288	76441	4137.37	10191.3	13757	32304.5	907313	4.5319e+06	57.7041	453.995	2245.49	304026	832.32	5495	350143	3.2287e+06	218722	123.678	357.921	10308	74072	445987	238.276	510.407	952.552	1192.4	1223	7876.51	2632.11	2041.27	11406.5	33652.8	18050.1	15492.3	13580.4	1064.64	698.453	248.626	302.316	562.73	11992.4	519.213	1105.8	882	1343	1419
594 #02-271 4-24-6	2189.71	7690	5500.15	226601	56601	3139.12	7394.97	10195.5	25197.1	958564	6.13445e+06	53.5078	512.542	2736.16	273709	950.188	4827	193857	2.62066e+06	171697	146.494	300.901	9276	54805	410361	217.619	312.563	739.235	895.887	1024	8097.08	2570.01	1858.11	16461.6	51412.6	17337.5	16284	10040.1	895.625	602.783	93.2351	190.205	425.515	10514.1	334.749	548.665	567	920	481
595 #02-272 4-24-3	2148.15	6828	5925.7	221393	68761	3069.2	9829.39	12152	35833.7	972770	5.01249e+06	87.953	458.327	2050.69	255488	947.924	5321	264992	3.99824e+06	200196	148.388	385.811	9528	67004	553778	183.351	458.476	733.135	877.523	1315	8412.82	2942.29	1992.88	12250	35311.7	17714.9	15299	10927.8	746.715	582.52	138.243	264.55	387.853	11384.3	344.919	580.341	683	1157	702
596 #02-273 4-25-12	2052.72	5577	3735.47	250008	96366	2434.79	6507.91	9503.59	24726.4	829123	4.51495e+06	105.591	440.75	3086.35	261513	1023.03	3404	115025	1.40679e+06	215192	74.702	322.381	3361	18226	221600	184.517	225.698	286.299	420.143	317	9739.77	3273.69	2213.78	13464	39927.1	22005.5	10860	8086.42	669.955	627.581	103.24	189.022	438.213	11629.8	431.862	390.99	648	1025	726
597 #02-274 4-25-1	2189.72	3330	3050.36	134723	84819	1082.17	1626.14	4810.16	2887.1	501115	2.92431e+06	75.2054	326.812	1772.43	91839.6	265.659	1703	57107.4	1.04274e+06	134075	38.6212	208.164	2152	16384	170720	99.816	110.9	124.456	202.637	114	7202.96	2800.84	2036.26	10863.9	31588.7	24506.2	9213.2	5751.04	826.757	733.581	136.203	183.915	367.515	13068.2	416.787	604.264	1216	1873	914
598 #02-275 4-25-3	2034.47	7776	3751.96	161776	60113	2636.12	5012.85	8572.66	16607	598881	4.1653e+06	103.571	412.054	4296.1	217886	1032.01	3302	106773	1.19542e+06	412198	50.278	686.553	2443	19396	237863	168.216	278.318	220.881	363.862	432	5328.4	2118.92	1810.94	10886.8	33613.9	21279.1	10991	9118.76	929.776	769.152	219.185	319.761	461.611	13072.6	407.886	969.551	1898	1886	1344
599 #02-276 4-27-1	2059.22	6249	2434.19	171499	56154	1823.93	4397.88	6927.52	16002.9	565277	4.19875e+06	194.472	482.849	2619.61	153819	667.806	2808	127651	1.36399e+06	405841	81.284	280.624	2843	13470	346493	169.015	370.676	326.522	438.885	416	4451.08	2174.64	1688.93	10000.3	32383.4	21732	10047.4	6406	890.184	567.981	107.13	275.447	341.645	11595.1	397.989	898.584	876	1358	1141
600 #02-277 4-27-12	2096.01	3805	3405.69	186680	52504	1645.21	4579.73	7166.04	19345.5	621562	4.51522e+06	123.937	442.378	1985.31	174482	1150.63	3658	121667	1.61649e+06	236029	81.7895	627.473	3313	11969	266909	153.841	203.959	339.472	558.586	532	4857.81	1479.31	836.541	8774.82	25891.9	14175.6	9785.11	7906.27	814.585	555.089	105.503	284.717	385.477	10668.8	451.55	343.981	440	825	372
601 #02-278 4-27-3	2058.24	3634	3202.01	167493	58129	1449.65	4644.06	8019.63	14004.5	626353	4.38764e+06	85.2516	457.085	2045.05	127790	843.824	3081	107155	1.43e+06	237196	126.053	293.112	3298	15310	285158	123.4	316.176	333.306	358.657	332	5331.78	1563.34	1059.76	7154.27	23567	12211.8	9880.89	6524.86	678.491	594.185	53.2284	188.795	366.736	10175.3	433.685	691.468	851	1039	664
602 #02-279 4-27-6	2054.14	6549	3218.11	164391	47073	1732.01	3899.92	6501.69	13328.4	624686	3.95159e+06	132.88	389.681	2063.81	125011	836.964	2551	99174.4	977744	469675	65.6292	902.737	2698	12729	270956	92.4912	274.984	320.125	431.357	304	4838.6	1386.72	942.443	7223.04	24975.8	13644.6	8704.61	7344.5	506.822	575.274	84.227	122.534	420.628	10942.4	329.453	537.822	474	599	510
603 #02-280 4-28-12	2129.51	6372	4932.55	168686	43190	2628.91	5991.89	8638.52	23349.9	747588	4.39289e+06	92.1733	471.439	1818.05	169067	1171.18	3188	124932	813669	128161	92.3558	509.495	3377	12838	114758	184.262	307.326	366.791	653.322	428	4339.96	1537.41	1467.93	11408.5	37766	15766.8	11729.2	7175.04	682.316	723.975	153.187	283.15	526.074	10481.5	389.789	398.82	473	628	786
604 #02-281 4-28-3	2182.4	3618	2542.16	142717	45527	1448.37	3415.31	6264.57	14944.7	602354	3.73306e+06	108.788	404.555	1808.89	177733	641.735	3119	84034.2	1.08975e+06	105578	102.085	432.603	2982	13597	117361	187.979	525.129	409.198	594.758	359	4681.89	1634.93	1657.59	11525.1	33434.1	18507.9	11379	7245.9	637.521	545.084	162.697	224.274	347.595	10916.9	501.389	804.774	727	962	1165
605 tQC	2136.92	8525	5600.59	115366	100502	3214.37	5987.24	12318.4	13061.3	749923	4.22814e+06	246.911	361.905	2217.04	262555	307.506	2318	132673	1.73088e+06	254639	97.7708	180.848	3254	24186	240986	151.679	191.617	136.473	485.792	438	4705.53	1540.99	1276.17	11666.9	38731.8	14520.6	11667.2	7502.82	910.983	846.542	183.776	311.658	384.952	12935.1	516.229	1665.63	1504	1703	1909
606 #02-282 PQC	2150.2	7957	5657.83	133011	84406	2993.74	5567.81	9575.34	10726.1	861831	4.21353e+06	177.906	456.743	2245.49	272394	538.704	2536	136783	1.63311e+06	241508	91.0962	136.894	2895	21969	232504	111.927	204.859	72.6904	395.714	347	4705.87	1553.83	1396.1	12053.2	39584.1	15985.6	11769	8192.98	929.037	838.611	203.313	276.485	386.493	12471.3	459.417	1505.52	1811	1759	1767
607 #02-283 Blank + ISTD	1981.37	43		433.961	269	0.717857		76.7202	344.572	888.136	3732.11	53.6368	270.636	311.584	511.007	109.388	7		842.644	127.001	34.2688	94.9778	7	33		76.099	50.4207	35.4355	56.2881	0				36.2178		26.8184			645.289	339.211	90.2707	194.312	374.894	10003.9	403.168	171.52	367	393	229
608 #02-284 4-28-6	2210.06	6326	4346.37	155018	52445	1723.8	4582.6	9219.48	22730.7	753619	4.25878e+06	78.8466	428.921	1604.35	157358	1119.71	2752	106322	919292	105589	155.486	432.33	3162	15224	135772	198.155	366.84	425.824	517.573	423	4908.76	1669.34	1463.21	11496	33540.2	13557.6	9088	6429.16	600.844	566.815	77.2081	109.735	331.817	10681.5	366.262	280.684	401	608	382
609 #02-285 4-28-1	2031.73	5104	3511.29	159096	50538	1671.31	4249.79	8740.77	16663.1	781621	4.68637e+06	62.513	390.876	1641.11	162177	847.412	3912	133713	902021	146425	91.1993	491.083	4215	15509	133823	179.417	301.648	294.632	583.577	530	5176.55	1605.47	1720.69	12133.9	39314.5	20529.6	9803.86	6647.72	739.223	456.112	119.311	242.956	413.93	10830.6	344.759	673.803	864	770	592
610 #02-286 4-29-12	2060.49	2653	2287.81	144177	47016	1355.35	3459.18	4590.54	15216.9	648449	3.57049e+06	121.236	375.234	2482.29	165539	779.64	1912	87506.4	841782	115771	140.004	266.722	2012	11827	94114.5	175.38	288.904	253.366	255.641	261	3571.05	1274.78	1319.1	11416.8	36398.4	10057.1	8267.15	6031.42	761.061	509.4	103	149.013	389.493	11686.1	358.286	447.713	701	673	608
611 #02-287 4-29-3	2204.07	3212	1988.55	101653	41468	1101.61	1802.64	4659.08	12630.5	560030	2.6468e+06	84.064	413.949	1588.04	101664	372.984	1674	79177.1	685102	63639.2	163.189	157.117	2186	11225	78862.4	170.772	227.492	260.558	183.01	214	3550.35	1005.27	943.594	8619.16	33200.7	7836.53	7115.15	5190.08	1663.25	1168.04	166.293	286.423	663.62	15712.6	633.744	1443.12	894	1026	1450
612 #02-288 4-29-6	2128.91	3044	2264.19	100403	34883	1215.75	2929.09	4667.38	12247.2	569301	3.5475e+06	124.11	341.786	1331.4	105809	507.12	2625	97669.4	753433	59228	216.928	239.867	2673	12709	91758.1	247.861	259.254	166.834	262.765	302	3541.61	1238.51	1066.59	12309.7	40256	10599.4	7330.95	5340.66	749.084	527.838	82.998	221.293	450.145	10935.2	432.092	365.012	866	875	487
613 #02-289 4-29-1	2045.81	1757	1524.06	121181	26497	1125.93	2431.35	3273	10116	594536	4.17836e+06	129.783	363.992	2090.63	83135	1187.96	2210	57197.3	849299	109009	450.44	464.108	1878	9416	204389	449.065	171.889	176.899	372.346	157	3168.26	647.443	745.038	13837.7	39092.6	6013.42	10029.5	7373.81	552.96	442.903	98.7515	112.752	317.41	10167.5	280.555	410.077	903	833	434
614 #02-290 4-3-6	2194.83	7509	4417.06	188134	42753	1905.5	6112.32	6179.55	14746.5	632357	4.06586e+06	135.94	410.567	2510	170593	698.022	2570	113246	1.49143e+06	293573	145.543	437.758	3380	21639	385186	185.946	244.111	85.3089	297.646	439	5875.33	2313.97	1832.66	12075.1	35417.2	23584.5	10701.2	6182.2	825.789	633.324	219.604	221.887	320.303	11234.6	423.465	773.806	887	1016	923
615 #02-291 4-3-1	2119.94	8045	3952.02	170780	42948	2441.66	5519.34	8538.9	13478.2	635609	4.60589e+06	157.649	443.662	2170.87	195236	983.801	2191	85871.1	1.43427e+06	975550	117.228	906.028	3085	22146	519364	173.353	322.099	174.45	415.753	401	5831.12	2067.83	1803.25	10462.1	29674.2	22417.6	13266.4	8123.6	729.077	581.36	94.0503	143.699	516.682	11083.4	321.204	721.027	764	951	859
616 #02-292 4-3-3	2065.4	6236	5096	208553	39538	2672.98	5114.53	6140.42	11776.9	678892	4.34973e+06	134.291	413.713	1941.21	202063	923.109	2766	97262.2	1.77197e+06	934680	70.3286	953.589	3569	24826	432920	163.598	391.889	179.833	513.978	453	5385.53	1593.56	1338.93	9167.18	27900.6	19766	11280.9	7756.75	715.788	592.954	79.3963	161.305	479.56	10475.6	408.364	642.444	635	881	804
617 #02-293 4-3-12	2002.32	5442	5510.01	177775	40729	2757.76	5191.58	7088.89	14927.7	720514	4.04805e+06	80.3466	435.754	2162.48	157570	1216.51	3127	95407.1	1.63044e+06	568794	152.005	789.549	2780	22032	402699	189.771	299.31	371.03	497.185	310	5142.73	1486.42	1502.56	10586.5	32664.8	26854.8	10464.1	6284.95	700.834	481.564	96.303	159.194	353.125	10547.5	406.061	423.659	478	373	262
618 #02-294 4-30-3	2138.33	3878	2600.29	131611	49591	1514.85	4448.38	7152.42	12651.7	585550	3.20371e+06	109.107	421.99	1813.49	110046	819.168	2522	88381.6	1.13901e+06	266379	74.8658	277.594	2087	12068	273582	156.038	173.756	260.617	309.781	266	3549.77	2197.63	1479.98	7335.66	20369.1	15264.6	9265.75	7164.03	660.034	725.219	109.291	291.215	398.485	10776.6	310.101	598.196	1214	1615	906
619 #02-295 4-30-1	2169.95	6780	3640.34	122918	71856	2119.16	3837.76	8831.61	13076.5	616877	2.89535e+06	150.694	453.137	2061.64	160465	843.746	2489	105460	1.12331e+06	643328	119.075	550.235	2131	15438	336888	134.668	222.418	289.996	617.646	337	3886.02	1668.32	1386.29	6631.2	26880.8	20413.7	9239.28	6767.99	930.637	633.15	205.06	299.185	364.271	10592.3	415.835	1026.92	1238	1471	1277
620 #02-296 4-30-12	2085.62	5948	2888	120356	65082	1954.22	3594.4	6521.1	14281.2	650618	4.61409e+06	129.463	397.254	2986.38	183927	741.568	3159	101855	1.05464e+06	117693	80.6197	262.689	2508	14863	160772	169.602	207.029	173.593	488.131	272	4389.07	2370.15	1752.88	12331.7	32182.6	15284.3	11205.7	6782.22	1064.85	887.345	184.199	296.444	463.966	12711.7	358.541	1574.17	1383	1741	1295
621 #02-297 4-30-6	2161.48	4450	2590.89	143357	42432	1253.02	4054.87	6812.1	14146.5	592378	3.43994e+06	118.678	383.846	1682.08	122948	994.782	4025	101390	1.447e+06	193113	119.37	346.002	3625	16360	265910	138.63	266.707	298.181	561.398	387	4651.88	2620.89	1954.49	12618.2	28934.2	18821.7	10407.4	6442.73	595.618	579.315	93.2745	121.723	359.577	10388.1	370.109	400.467	893	868	451
622 tQC	2170.44	7769	5417.57	134093	78432	3181.52	4738.81	12449.9	11441.1	814836	4.27144e+06	209.162	394.286	2295.42	259747	670.364	2970	131230	1.31773e+06	252220	171.493	180.46	3107	21889	262825	166.271	178.874	249.125	430.891	559	4589.49	1805.54	1584.8	11285.9	40296.4	13293.2	11941.3	7125.81	1224.45	854.828	204.761	326.633	485.612	12148.6	434.648	1649.37	1891	2017	1703
623 #02-298 PQC	2229.88	8203	4723.89	133966	99654	3442.15	5633.98	10504.1	11670.7	641568	3.36297e+06	218.007	435.14	2127.68	232886	427.451	2761	116335	1.82424e+06	247448	112.187	226.658	2884	23573	250717	150.354	171.059	179.015	429.076	543	3923.48	1401.64	1568.57	11403.3	41364.2	16733.7	11951.6	7073.35	944.215	766.879	233.768	284.025	433.904	12810.1	513.285	1489.21	1718	1813	1585
624 #02-299 4-31-6	2001.59	6298	3706.39	152324	50547	3068.99	5934.62	8296.63	19281.3	825622	4.64992e+06	96.0981	415.736	2337.11	214788	1149.93	3956	119733	1.36405e+06	801240	225.878	972.849	2855	19173	427362	167.838	458.163	199.894	492.431	625	4680.35	1271.82	1265.46	10852.3	38484.4	18823.1	12913.5	8071	716.218	518.86	132.827	176.665	516.192	10964.9	389.743	645.848	1183	1121	855
625 #02-300 4-31-12	2083.4	5717	3269.41	157087	55765	2248.73	4257.71	7376.46	20493.5	643796	4.82166e+06	83.1293	423.305	2681	209139	646.563	3677	158725	1.22311e+06	148149	139.948	213.635	3047	18273	215964	145.259	274.111	176.987	445.293	298	5981.73	1693.63	1513.88	11584.1	42960.4	18761.9	12916	7043.75	774.555	534.49	129.439	209.228	425.002	12245.8	344.123	772.855	1200	1157	755
626 #02-301 4-31-3	2052.8	6710	3702.21	152757	54519	2267.3	4669.63	7418.32	20772.9	742498	4.71605e+06	99.846	382.408	2536.36	207408	922.778	3384	149228	1.02691e+06	254102	145.016	141.78	2270	15498	366170	225.005	234.31	204.552	380.221	427	4111.67	1216.88	1139.53	10351.7	35608.3	14325.1	11247.9	6805.47	735.841	546.676	118.026	264.658	489.415	10283.6	366.121	610.734	771	1015	662
627 #02-302 4-4-12	2023.94	6700	4919.36	174847	62392	2115.73	7362.48	11227.5	24692	769262	4.00056e+06	97.5629	379.013	1351.35	207146	1862.81	3665	83970.6	1.38467e+06	365824	119.447	728.33	4037	19965	268747	163.532	375.278	452.431	1103.35	582	5684.93	2682.03	1668.88	13990.1	38347.3	26779.8	9585.77	7234.72	683.625	535.964	47.1897	120.035	355.704	10404.5	370.249	420.925	592	599	463
628 #02-303 4-4-1	2045.2	6750	3734.99	142715	52972	1617.77	4350.28	5566.59	11650.6	553280	2.74619e+06	59.4962	365.997	915.158	129479	1869.21	3046	60196.2	920354	516500	116.371	1127.44	3427	14810	308565	168.681	470.154	356.408	592.066	542	4945.9	1569.16	1438.67	8462.39	26289	18067	9859.29	6222.98	685.746	545.477	133.301	255.341	278.923	11079.7	342.004	485.76	646	907	742
629 #02-304 4-4-6	2188.41	10698	7182.52	202154	53882	2847.59	8477.66	11215	23996.8	782517	4.05669e+06	55.352	378.871	2001.32	258472	1828.49	3119	62713.9	1.13193e+06	511475	221.591	943.048	3519	19399	269735	219.293	480.274	404.893	741.988	567	5966.79	2181.09	1784.5	12952.2	36230.8	23862.5	11427.5	7026.87	980.987	593.687	254.535	403.002	466.769	11226.3	385.484	712.41	808	1543	761
630 #02-305 4-4-3	2112.27	5977	3295.48	199754	53374	1399.47	4847.37	7062.96	18075	616689	3.41707e+06	58.3062	368.725	1105.13	126516	1102.27	3335	66615.7	1.04049e+06	438880	72.2486	790.472	2841	14149	290769	204.724	405.72	260.397	712.197	318	6008.8	2181.13	1572.54	9161.48	22921.1	17414.7	9947.82	7208.43	650.574	552.012	87.6258	248.843	357.64	10652.4	496.41	350.165	658	812	520
631 #02-306 4-5-1	2218.44	5820	1654.16	139094	50868	1545.36	2476.83	4483.22	12878	799870	3.77625e+06	418.895	491.186	2388.08	185224	1275.42	3191	68459.4	576294	54813.5	75.0524	289.003	2700	13719	68422.7	303.498	503.836	938.929	1323.58	375	5126.86	1128.46	1623.07	11655	43979.8	20514.1	10149.7	7241.35	753.664	576.167	100.633	188.714	416.505	11144.5	433.361	656.907	1154	1217	668
632 #02-307 4-5-3	2056.59	2596	1460.11	138495	36517	1361.66	2332.9	4069.51	15313.1	862397	3.90876e+06	272.546	354.111	2237.85	221841	1084.88	3482	61168	788189	46494.6	140.61	736.343	3085	16115	71171.6	243.565	327.979	467.585	952.84	234	5256	1024.99	1125.25	9195.5	35199	15841	10472.8	8052.34	592.735	483.966	79.5107	145.691	465.004	11452.4	447.839	522.884	706	755	712
633 #02-308 4-5-12	2061.68	4040	2213.36	128934	34884	1541.21	3761.34	5135.37	10096.4	497197	3.09262e+06	126.267	308.913	1853.17	117526	765.682	3062	80155.3	1.02651e+06	135485	118.599	321.401	2908	13902	131833	178.941	122.387	209.09	625.231	261	4454.8	1121.52	1007.28	6180.18	23687.9	14482.9	8800.61	6592	665.178	618.852	88.5964	194.201	496.491	10171.6	359.817	634.959	709	1075	910
634 #02-309 4-5-6	2181.5	3322	1950.77	110802	35082	1069.56	2924.54	4312.44	10100.1	649980	3.50969e+06	194.908	420.109	2013.79	159604	721.649	3087	54854.1	852747	70758.1	90.9266	296.369	2916	12980	101426	146.511	300.528	250.982	809.622	275	4034.05	1147.55	1059.34	8563.25	27572.6	15570	9232.22	4857.65	597.871	500.165	133.917	175.556	363.273	11053.6	433.689	530.279	754	819	543
635 #02-310 4-7-12	2108.62	4102	2616.39	161632	38317	1428.33	3114.84	5327.79	14656.8	570871	3.79768e+06	84.2387	401.502	2058.74	191860	482.703	2480	92627	959365	130973	101.938	170.519	2532	16484	123971	129.651	144.582	201.609	249.958	393	5238.28	1888.07	1342.67	11211	38077.2	14170.9	8656.89	6005.39	815.156	477.804	123.714	239.514	409.408	10476.4	311.258	424.24	597	653	613
636 #02-311 4-7-1	2194.75	3466	1972.98	127657	54560	767.962	2402.36	4179.62	8767.06	428331	2.95823e+06	104.462	265.54	1563.97	145205	429.651	2137	82167.4	1.3597e+06	188372	11.32	234.947	3471	19861	220645	91.7645	143.402	250.127	194.177	121	4907.9	2003.22	1689.22	9390.21	27734.3	23311.8	9474.05	6225.73	766.295	649.359	131.524	226.225	415.495	11058.9	405.844	660.337	1058	933	819
637 #02-312 4-7-3	2038.95	3283	2080.04	127639	52099	1287.66	2499.69	6174.61	9759.25	568054	2.99955e+06	69.1838	356.095	1438.33	137373	696.983	1781	120396	856783	135257	76.9703	146.897	2283	16566	127915	112.093	170.188	116.6	272.557	245	3899.56	1426.61	1020.62	8254.41	24849.7	18901.9	7792.33	5476.85	667.644	542.833	144.303	189.675	513.926	10305.3	409.68	435.863	423	879	423
638 #02-313 4-9-3	2053.13	6328	2613.06	139662	32852	1175.75	3261.3	4879.73	11644.8	640831	3.96337e+06	119.523	443.352	2546.69	172772	694.308	2976	104700	985922	112600	131.823	241.849	3021	13130	115861	197.57	182.212	265.124	575.543	235	5492.3	1135.8	1464.77	11588.2	41888	18860.3	9075.67	6641.12	636.005	580.074	60.9147	161.441	456.586	11302.4	353.487	362.17	416	517	264
639 #02-314 4-9-1	2061.82	4537	3543.75	154318	48021	1219.14	3456.37	6754.44	16926.8	657162	4.06881e+06	99.727	376.632	2050.72	152203	978.587	2035	90980.3	1.18691e+06	110834	25.654	394.275	3713	14113	153364	140.421	359.243	279.036	409.948	274	6114.47	1492.27	1537.34	11880	45934.9	18233.9	10523.1	7457.22	560.7	441.606	85.3489	141.953	293.694	11180.3	411.981	364.585	493	606	543
640 #02-315 4-9-12	2125.18	4499	4557.65	183973	42124	1259.17	4239.81	6140.83	15262.8	628959	4.02923e+06	102.604	390.372	2051.27	178435	569.95	3221	77489.7	1.14443e+06	115813	136.746	232.267	3165	14549	166151	216.199	311.573	375.316	522.653	168	5528.81	1436.95	1437.54	12083.8	44791.9	17314.7	10854.7	6190.93	609.498	629.984	132.88	186.55	376.503	11524.3	417.152	415.193	467	845	494
641 #02-316 4-9-6	2091.57	6700	3794.99	167096	40427	1670.8	3554.35	5834.44	16632.4	808388	4.73385e+06	88.431	378.214	2480.1	228077	754.276	2677	96130.4	1.08537e+06	125622	144.402	294.36	2475	14857	205243	197.022	335.683	309.303	482.488	304	5412.46	1341.84	1597.06	13929.6	51170.3	23822	11800.7	8574.57	975.711	726.064	174.138	370.406	439.472	11184.8	410.964	659.85	959	1178	969
642 tQC	1966.69	8683	4503.51	129697	72724	3351.96	5471.45	8764.11	10955.1	751249	4.17218e+06	152.114	322.208	2145.06	215008	591.237	2185	141680	1.50784e+06	245881	109.963	193.972	2766	21207	236942	137.257	182.558	159.887	297.808	351	4557.96	1709.46	1460	10374	42191.9	15406.7	10846.3	7454.46	918.081	844.195	235.622	206.844	378.026	12699.2	431.783	1247.49	1886	2008	1711
643 #02-317 PQC	2017.69	8225	4485.29	113213	80201	3290.81	6367.11	8016.22	11529.2	684996	3.97581e+06	196.781	306.801	2143.99	241544	382.876	2152	128645	1.60746e+06	274405	98.5269	206.434	3077	21734	232164	166.37	177.124	229.164	270.767	479	4246.86	1563.12	1414.55	10625.5	39597.5	14626.4	11558.5	9036.11	922.968	760.194	259.47	278.313	340.265	11954.4	356.667	1401.3	1633	1853	2019
644 #02-318 Blank + ISTD	1948.24	61		351.709	421	2.7944	42.4926	65.985	198.463	1042.98	3213.84	29.3133	208.352	254.186	557.684	126.482	24		913.603	99.6329	31.3768	75.6773	23	13		64.9598	35.1058	42.6903	31.8566	13		163.995							540.372	499.178	84.6209	310.312	356.493	8984.55	412.01	182.366	327	586	245
645 #02-319 Unextracted blank	1925.56	55		161.789	97			85.2295	261.192	724.361	2434.47	38.5656	263.769	263.359	510.296	99.3292	12		274.43	97.2401	59.4625	64.9811	12	34		84.978	2.01357	27.3991	28.4495		171.193	89.0287							490.4	343.67	74.6727	140.57	429.333	8859.02	392.11	141.263	184	273	226
[truncated: 380 more columns]
